# Supplementary material for: Safety culture in a pharmacy setting using a pharmacy survey on patient safety culture: a cross-sectional study in China
Source: PubMed Central journal article supplement — BMJ Open. 2014 Jun 28;4(6):e004904. doi: 10.1136/bmjopen-2014-004904 (PMC4078772; doi:10.1136/bmjopen-2014-004904), 2014-06-28
Supplement: bmjopen-2014-004904.draft_revisions.pdf [file bmjopen-2014-004904.draft_revisions.pdf]

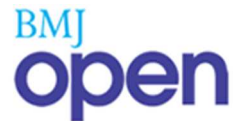

**Safety Culture in Pharmacy Setting Using Pharmacy Survey  
on Patient Safety Culture: A Cross-sectional Study in China**

|                                 |                                                                                                                                                                                                                                                                                                                                                                                                                                                                                                                                                                                                                                                                                                                                             |
|---------------------------------|---------------------------------------------------------------------------------------------------------------------------------------------------------------------------------------------------------------------------------------------------------------------------------------------------------------------------------------------------------------------------------------------------------------------------------------------------------------------------------------------------------------------------------------------------------------------------------------------------------------------------------------------------------------------------------------------------------------------------------------------|
| Journal:                        | <i>BMJ Open</i>                                                                                                                                                                                                                                                                                                                                                                                                                                                                                                                                                                                                                                                                                                                             |
| Manuscript ID:                  | bmjopen-2014-004904                                                                                                                                                                                                                                                                                                                                                                                                                                                                                                                                                                                                                                                                                                                         |
| Article Type:                   | Research                                                                                                                                                                                                                                                                                                                                                                                                                                                                                                                                                                                                                                                                                                                                    |
| Date Submitted by the Author:   | 21-Jan-2014                                                                                                                                                                                                                                                                                                                                                                                                                                                                                                                                                                                                                                                                                                                                 |
| Complete List of Authors:       | Jia, Pengli; Chinese Evidence-Based Medicine, West China Hospital, Sichuan University,<br>Zhang, Longhao; Chinese Evidence-Based Medicine, West China Hospital, Sichuan University,<br>Zhang, Mingmig; WHO patient for patient safety champion, Chinese Evidence-Based Medicine, West China Hospital, Sichuan University,<br>Zhang, Linli; West China Second University Hospital, Department of Pharmacy<br>Zhang, Chuan; West China Second University Hospital, Department of Pharmacy<br>Qin, Shengfang; Sichuan Provincial Hospital for Women and Children, Department of Fetal Medicine<br>Li, Xinli; The Sixth Chengdu Hospital, Department of Pharmacy<br>Liu, Kexin; West China Hospital, Sichuan University, Department of Pharmacy |
| <b>Primary Subject Heading</b>: | Global health                                                                                                                                                                                                                                                                                                                                                                                                                                                                                                                                                                                                                                                                                                                               |
| Secondary Subject Heading:      | Health services research                                                                                                                                                                                                                                                                                                                                                                                                                                                                                                                                                                                                                                                                                                                    |
| Keywords:                       | Quality in health care < HEALTH SERVICES ADMINISTRATION & MANAGEMENT, Organisation of health services < HEALTH SERVICES ADMINISTRATION & MANAGEMENT, International health services < HEALTH SERVICES ADMINISTRATION & MANAGEMENT, HEALTH SERVICES ADMINISTRATION & MANAGEMENT                                                                                                                                                                                                                                                                                                                                                                                                                                                               |
|                                 |                                                                                                                                                                                                                                                                                                                                                                                                                                                                                                                                                                                                                                                                                                                                             |

SCHOLARONE™  
Manuscripts

**Title page**

**Manuscript title:** Safety Culture in Pharmacy Setting Using Pharmacy Survey on Patient Safety  
Culture: A Cross-sectional Study in China

**Running title:** Patient Safety Culture in Pharmacy Setting

**Names and affiliations of contributing authors:**

PL Jia<sup>1#</sup>, LH Zhang<sup>1#</sup>, MM Zhang<sup>1§</sup>, LL Zhang<sup>2</sup>, C Zhang<sup>2</sup>, SF Qin<sup>3</sup>, XL Li<sup>4</sup>, KX Liu<sup>5</sup>

# Equal contributors

§Corresponding author

Pengli Jia (PLJ): Research assistant, Chinese Evidence-Based Medicine, West China Hospital,

Sichuan University, Chengdu 610041 P R China. Equal-First authors

Longhao Zhang (LHZ): Research assistant, Chinese Evidence-Based Medicine, West China Hospital,

Sichuan University, Chengdu 610041 P R China. Equal-First authors

Mingming Zhang (MMZ): MSc. Professor and WHO patient for patient safety champion, Chinese Evidence-Based Medicine, West China Hospital, Sichuan University, Chengdu 610041 P R China.

Corresponding author

Linli Zhang (LLZ): Professor, Department of Pharmacy, West China Second University Hospital, Chengdu 610041 P R China.

Chuan Zhang (CZ): Senior Pharmacist, Department of Pharmacy, West China Second University Hospital, Chengdu 610041 P R China.

Shengfang Qin (SFQ): Associated Professor, Department of Fetal Medicine, Sichuan Provincial Hospital for Women and Children, Chengdu 610045 P R China

Xinli Li (XLL): Associated Professor, Department of Pharmacy, The Sixth Chengdu Hospital, 610051 P R China

1 Kexin Liu (KXL):Pharmacist, Department of Pharmacy, West China Hospital, Sichuan University,  
2  
3 Chengdu 610041 P R China.  
4

5 **Correspondence details for corresponding author:**  
6

7  
8 Prof. Mingming Zhang, Chinese Evidence-Based Medicine Centre, West China Hospital  
9  
10 Sichuan University, Chengdu 610041. P.R. China.  
11

12  
13 Tel: 86-28-85422079  
14

15  
16 Fax: 86-28-85422253  
17

18  
19 E-mail: mingming-zhang@163.com  
20

21 **Key words:** Patient safety; Safety culture; Pharmacists; Surveys  
22

23 **Word count:**4161  
24  
25  
26  
27  
28  
29  
30  
31  
32  
33  
34  
35  
36  
37  
38  
39  
40  
41  
42  
43  
44  
45  
46  
47  
48  
49  
50  
51  
52  
53  
54  
55  
56  
57  
58  
59  
60

## Abstract

**Objective** To explore the attitudes and perceptions of patient safety culture for pharmacy workers in China by using a Pharmacy Survey on Patient Safety Culture (PSOPSC), and to assess the psychometric properties of the translated Chinese-language version of the PSOPSC.

**Design** Cross-sectional study.

**Participants** Data were obtained from 20 hospital pharmacies in southwest part of China.

**Method** Chi-Square test was performed to explore the differences on pharmacy staff in different hospital and qualification levels and countries towards patient safety culture. We also computed descriptive statistics, internal consistency coefficients and inter-subscale correlation analysis, then conducted a exploratory factor analysis. A test-retest was performed to assess reproducibility of the items.

**Result** A total of 630 questionnaires were distributed of which 527 were responded validly (response rate 84 %). The positive response rate for each item ranged from 37% to 90%. The positive response rate on three dimensions (“*Teamwork*”, “*Staff Training and Skills*” and “*Staffing, Work Pressure, and Pace*”) was higher than that of Agency for Healthcare Research and Quality(AHRQ) data ( $P<0.05$ ). There was a statistical difference on the perception of patient safety culture in different hospital and qualification levels. The internal consistency of the total survey was comparatively satisfied (Cronbach’s  $\alpha=0.89$ ).

**Conclusion** The results demonstrated that among the pharmacy staffs surveyed in China,there was a positive attitudes towards patient safety culture in their organizations. Identifying perspectives of patient safety culture from pharmacists in different hospital and qualification levels are important,since this can help support decisions about action to improve safety culture at pharmacy settings. The Chinese translation of PSOPSC questionnaire (version 2012) applied in our study is

1  
2  
3  
4  
5  
6  
7  
8  
9  
10  
11  
12  
13  
14  
15  
16  
17  
18  
19  
20  
21  
22  
23  
24  
25  
26  
27  
28  
29  
30  
31  
32  
33  
34  
35  
36  
37  
38  
39  
40  
41  
42  
43  
44  
45  
46  
47  
48  
49  
50  
51  
52  
53  
54  
55  
56  
57  
58  
59  
60

acceptable.

## Strengths and limitations of this study

- This is the first kind of study that was conducted in China measuring patient safety culture in pharmacy setting. The results of this study may provide some evidence to help healthcare decision makers or policy makers in pharmacy settings from developing countries to develop effective strategies to assess areas of strength and identify areas for improvement in their patient safety culture as part of their quality improvement activities.
- Findings might be limited by selection bias as pharmacies were selected on a convenient basis. Our study was carried out only in the Second-grade and Third-grade hospitals which may not reflect the whole picture of patient safety culture in China. Meanwhile, this is the first kind of study using PSOPSC to measure safety culture in pharmacy setting, there are no similar studies from benchmark scores using PSOPSC for us to compare with, so the external comparison was restrictive.

## Background

Medication errors are the largest component of medical errors accounting for about a quarter of the incidents which threaten patient safety.[1] An estimated 770000 people are injured or die in hospitals from adverse drug events(ADEs) each year which are injuries resulting from drug use. Approximately 28% of ADEs are associated with a medication error and therefore are judged to be preventable.[2] Fifty percent of these ADEs could have been prevented by a pharmacist.[3] It appears that pharmacists and clinical pharmacy services can substantially improve patient safety and reduce hospital costs associated with medication errors.[1] Meanwhile, the report by Institute of Medicine (IOM) indicated for a safety culture in which adverse events can be reported without people being blamed, and that when mistakes occur that lessons are learned.[4] Therefore, if hospital pharmacies want to improve patient safety, it is important to know more about the views of their staff in relation to the culture of patient safety.

Today, reducing medication errors and improving patient safety have become common topics of health services around the world.[5] Many developed countries have initiated the research into the role played by patient safety culture research. On a global basis, several international organizations promote the establishment of a culture of patient safety: the WHO Patient Safety Programme will launch in 2014 the Third Global Patient Safety Challenge, focusing on medication safety, the National Patient Safety Agency in the UK, the Agency for Healthcare Research and Quality in US, The Australia Commission of Safety and Quality, and The European Foundation for the Advancement of Healthcare Practitioners.[4,6] There are some developing countries that are oblivious to the problems created by medication errors. However, efforts are now being taken in these countries, especially India, China and Philippines, to set up pharmacovigilance system for collection of information on ADEs.[6-8]

1  
2  
3  
4  
5  
6  
7  
8  
9  
10  
11  
12  
13  
14  
15  
16  
17  
18  
19  
20  
21  
22  
23  
24  
25  
26  
27  
28  
29  
30  
31  
32  
33  
34  
35  
36  
37  
38  
39  
40  
41  
42  
43  
44  
45  
46  
47  
48  
49  
50  
51  
52  
53  
54  
55  
56  
57  
58  
59  
60

As pharmacies continually strive to improve safety and quality, there is a growing recognition of the importance of establishing a culture of patient safety. Achieving such a culture requires an understanding of the values, and beliefs about what is important in the organization and what attitudes and behaviors related to patient safety are expected.[9] The assessment of safety culture in pharmacies has recently begun to develop and the consistency of methods and instruments used across pharmacies needs to be further elaborated.[10] Quite often, hospital pharmacies have been included in overall hospital based safety culture assessments.[11-16] There are a few studies of pharmacy survey on patient safety culture by using different scales.[10,17-19] However, most of these studies focused on the evaluation of the psychometric properties of the scales or on developing, and examining the component structure and internal consistency of the survey instruments.[10,18,19] E.g. the study by Ashcroft aims to develop a Pharmacy Safety Climate Questionnaire (PSCQ) and examine the component structure and internal consistency in the community pharmacy setting in England.[19] Nevertheless, no study to date, to our knowledge, using survey developed for pharmacists has been published in which the safety culture in hospital pharmacies has been assessed.

In this study, we measured the patient safety culture in China's hospital pharmacies by using the modified version of Pharmacy Survey on Patient Safety Culture (PSOPSC) developed by AHRQ (version 2012).[9] We also compared some of the findings with existing data from the AHRQ pilot study. Meanwhile, we intended to assess the quality of this investigative questionnaire.

## Methods

### Questionnaire

The Pharmacy Survey on Patient Safety Culture (PSOPSC) was translated and modified to suit the Chinese system. The original PSOPSC was developed by AHRQ in 2012 on the purpose of pilot study which was designed to assess 11 dimensions of pharmacy with 36 items of patient safety

1 culture.[9] The questionnaire also included three questions that ask respondents to rate the frequency  
2 with which mistakes were documented and one question that provides an overall rating on patient  
3 safety.[20] Additionally, the original PSOPSC contained a section of “*Background Questions*” as  
4 well as an open ended section. We made a slight emendation of PSOPSC questionnaire by combining  
5 two items—( A3:“*Technicians in this pharmacy receive the training they need to do their jobs*” and  
6 A10: “*Staff get enough training from this pharmacy*”) into one item because they were almost the  
7 same meaning in Chinese translation. Furthermore, we added two items to the section “*Background*  
8 *Questions*”—(gender and hospital levels) and refreshed the qualification categories to adapt to  
9 Chinese context.

10  
11  
12 The survey used either 5-point agreement scales (“Strongly disagree” to “Strongly agree”) or  
13 frequency scales (“Never” to “Always”). Items include a “Does not apply or Don’t know” option.[20]

14  
15 The permission to use PSOPSC was obtained from AHRQ. The Chinese translation was carried  
16 out in several steps. First, the recommended guideline of PSOPSC: *User’s Guide* was carefully  
17 discussed within the research group before translation. The first translation was done by a graduate  
18 medical student with background in patient safety. Then, the translation was double checked and  
19 reviewed by the research group including experts in pharmacy, methodologists, and English. We had  
20 a further discussion regarding to some wordings and especially on some items that would cause  
21 misunderstanding in Chinese language.

## 22 **Sample**

23 Convenient sampling was used to survey hospital pharmacies throughout southwest part of China.  
24 The self-administered questionnaire was conducted over six months from March through August  
25 2013 with 20 hospital pharmacies included. We involved in all pharmacy staff working in the  
26 pharmacy area where prescriptions were dropped off, filled, dispensed, and picked up or prepared for  
27 delivery.[9]



1  
2  
3  
4  
5  
6  
7  
8  
9  
10  
11  
12  
13  
14  
15  
16  
17  
18  
19  
20  
21  
22  
23  
24  
25  
26  
27  
28  
29  
30  
31  
32  
33  
34  
35  
36  
37  
38  
39  
40  
41  
42  
43  
44  
45  
46  
47  
48  
49  
50  
51  
52  
53  
54  
55  
56  
57  
58  
59  
60

To ensure the privacy of the respondents, the survey was strictly anonymous. Permission to conduct the investigation was granted by the hospital pharmacy directors before investigation. The participants were informed of the purpose of the survey and voluntarily completed a paper copy of the questionnaire by the research coordinators in different hospitals.

### **Data screening and collection**

After receiving the completed questionnaires, a preprocessing step was applied to remove incomplete or invalid data and based on the study by Hellings J.[14] We checked and examined the returned questionnaire. The exclusion criteria were similar to two studies: 1) there was no entire section completed; 2) there was fewer than half items answered or all the items answered the same.[4,14] All data was entered by two researchers (Jia PL and Zhang LH) independently, and then were cross-checked mutually by Epidata (version, 3.02). In case of doubts or disagreement in some answers, we looked into the original questionnaires. Negatively worded items were reversed to ensure that positive answers indicated a higher score. Most of the items in the questionnaire used the Likert 5- point response scale of agreement (Strongly disagree to Strongly agree) or frequency (Never to Always), so the lowest three scoring(1-3) answers (Strongly disagree/Disagree/Neither Agree nor Disagree or Never/Rarely/Sometimes), the highest two scoring (4-5) answers(Agree /Strongly agree or Most of the time/Always), as well as the highest two scoring answers were perceived as positive response answers, and the lowest three scoring answers were deemed other response answer. We calculated the positive response rate according to the formula by the User's Guide of PSOPSC.[9] Items marked as "Does Not Apply/Don't Know" response option by the respondents were excluded when displaying percentages of response and the positive response scores.[9]

### **Data analysis**

We analyzed the demographic characteristics using the Excel 2007. The number of positive response/positive response rate of all the items was also summarized. Positive response rate was used

1 to evaluate the attitudes towards patient safety culture on different dimensions or items. We used  
2  
3 Chi-Square test to compare whether there was a statistical difference on pharmacy staff in hospital  
4  
5 and qualification levels towards patient safety culture. A Chi-squared test was also used to infer if  
6  
7 there was a statistical difference on “*patient safety grade*” in Chinese pharmacies compared with that  
8  
9 of US pharmacies, with the significant level of  $P = 0.05$ .

10  
11 We calculated Cronbach’s  $\alpha$  and exploration factor analysis to evaluate the quality of the  
12  
13 questionnaire. Internal consistency value (Cronbach’s  $\alpha \geq 0.70$ ) for newly developed scales was  
14  
15 recommended.[4] Structure validity was explored using principal component factor analysis by  
16  
17 Kaiser-Meyer-Olkin Measure of Sampling Adequacy ( $KMO > 0.7$ ) and by Bartlett’s Test of Sphericity  
18  
19  $P < 0.05$ .

20  
21  
22 Interrelations among 11 dimensions were calculated using the non-parametric Spearman test  
23  
24 as it is adapted to qualitative ordinal variables. The correlations should be less than 0.8 for the  
25  
26 composites to be considered unique and avoid problems with multicollinearity.[12]  
27

28  
29 A test–retest was administered in a specialized hospital to assess the reproducibility. Thirty-three  
30  
31 randomly selected pharmacy staff were asked to answer the questionnaire twice with a 2-week  
32  
33 interval between the test and the retest. Test–retest reliability was assessed by the one-way  
34  
35 intra-class correlation coefficient (ICC type (1, 1).[21] Reliability was considered good if ICC was  
36  
37 greater than 0.70.[21]  
38

## 40 41 **Ethic**

42  
43 This was a non-interventional survey. We were informed that no required from the ethics committee  
44  
45 needed this time by the hospital ethics committee. However, responding to the questionnaire was  
46  
47 voluntary and all answers were de-identified to maintain confidentiality.  
48  
49  
50  
51  
52  
53  
54  
55  
56  
57  
58  
59  
60

## Results

### Sample and response statistics

A total of 630 questionnaires were distributed of which 527 were responded validly (84%). Three hundred and seventy nine (72%) of the respondents were female, 421 (80%) were junior pharmacists, followed by pharmacy interns (16%) and senior pharmacists (4%). The majority of the respondents (68%) was from Third-grade hospitals (Table 1).

**Table 1 Demographic characteristics of respondents**

| Characteristics                   | Senior pharmacist<br>(n = 20) | Junior pharmacist<br>(n = 421) | Pharmacy intern<br>(n = 86) | Total<br>(n = 527)     |
|-----------------------------------|-------------------------------|--------------------------------|-----------------------------|------------------------|
| <b>Sex</b>                        |                               |                                |                             |                        |
| Male                              | 4(2.7)                        | 115(77.7)                      | 29(19.6)                    | 148(100 <sup>a</sup> ) |
| Female                            | 16(4.2)                       | 306(80.8)                      | 57(15.0)                    | 379(100)               |
| <b>Working time in hospital</b>   |                               |                                |                             |                        |
| Less than 6 months                | 3(5.6)                        | 40(74.1)                       | 11(20.4)                    | 54(100)                |
| 6 months to less than 1 year      | 5(6.4)                        | 57(73.1)                       | 16(20.5)                    | 78(100)                |
| 1 to 3 years                      | 5(4.0)                        | 104(83.9)                      | 15(12.1)                    | 124(100)               |
| 3 to 6 years                      | 3(3.0)                        | 82(81.2)                       | 16(15.8)                    | 101(100)               |
| 6 to 12 years                     | 1(1.4)                        | 55(77.5)                       | 15(21.5)                    | 71(100)                |
| 12 years or more                  | 3(3.0)                        | 83(83.8)                       | 13(13.1)                    | 99(100)                |
| <b>Working hours per week</b>     |                               |                                |                             |                        |
| 1 to 16 hours                     | 0(0)                          | 14(87.5)                       | 2(12.5)                     | 16(100)                |
| 17 to 31 hours                    | 1(4.5)                        | 18(81.8)                       | 3(13.6)                     | 22(100)                |
| 32 to 40 hours                    | 14(4.7)                       | 244(73.2)                      | 42(14.0)                    | 300(100)               |
| More than 40 hours                | 5(2.6)                        | 145 (76.8)                     | 39(20.6)                    | 189(100)               |
| <b>Hospital level<sup>b</sup></b> |                               |                                |                             |                        |
| Third-grade hospital              | 14(3.9)                       | 290(81.2)                      | 53(14.8)                    | 357(100)               |
| Second-grade hospital             | 6(3.5)                        | 131(77.1)                      | 33(19.4)                    | 170(100)               |

<sup>a</sup> Parenthesis represent percentage

<sup>b</sup> Third-grade hospital: provincial and municipal hospital  
Second-grade hospital: regional hospital

1 In our study, the percentage of positive responses for the 11 patient safety culture dimensions ranged  
2 from 50% to 88%, the mean positive response rate was 71%. The lowest positive response rate of  
3 dimension was “*Staffing, Work Pressure, and Pace*” (50%), while the highest positive response rate  
4 of dimension was “*Staff Training and Skills*” (88%). There were two dimensions of which positive  
5 response rate were less than 60% such as “*Patient Counseling*”(57%), and “*Staffing, Work Pressure,*  
6 *and Pace*” (50%). The positive response rate for the rest of the items ranged from 37% to 90%. The  
7 highest positive response rate of the three items reached 90% , while the lowest positive response rate  
8 of the item was “*Staff feel like their mistakes are held against them*”(37%)(Table 2).  
9

10 However, the 2012 Preliminary Comparative Results: PSOPSC in US showed that the average  
11 positive response rate of 11 dimensions ranged from 41% to 90%, the overall average positive  
12 response rate for dimensions was 78%. The lowest positive response rate of item was “*We feel rushed*  
13 *when processing prescriptions*”(14%) and the highest positive response rate item was “*Our*  
14 *pharmacists tell patients important information about their new prescriptions*” (93%). There were 4  
15 items of which the positive response rate were less than 60% (Table 2).  
16

17 There were some differences between the adapted Chinese PSOPSC with that of original US  
18 PSOPSC, so only the same items were compared to explore the differences of perceptions towards  
19 patient safety culture between the two countries. The results showed that there was a significant  
20 difference on three items ( $P < 0.05$ ) of which the positive response rate on three items in China was  
21 higher than that of the US. These dimensions were (1) *Teamwork*, (2) *Staffing, Work Pressure, and*  
22 *Pace*. However, there was a significant difference on 18 items ( $P < 0.05$ ), which of the positive  
23 response rate on 18 items in China was lower than that of the US (Table 2).  
24  
25  
26  
27  
28  
29  
30  
31  
32  
33  
34  
35  
36  
37  
38  
39  
40  
41  
42  
43  
44  
45  
46  
47  
48  
49  
50  
51  
52  
53  
54  
55  
56  
57  
58  
59  
60

**Table 2 Positive response rate of each item , Cronbach's  $\alpha$  for dimensions and reproducibility**

| Dimension/items(internal consistency reliability coefficient)                                                                                                   | US  | China | ICC  |
|-----------------------------------------------------------------------------------------------------------------------------------------------------------------|-----|-------|------|
| <b>1 Physical Space and Environment</b> (Cronbach's $\alpha=0.60$ )                                                                                             | 72% | 69%   |      |
| A1. This pharmacy is well organized.                                                                                                                            | 84% | 84%   | 0.86 |
| A5. This pharmacy is free of clutter                                                                                                                            | 67% | 53%   | 0.80 |
| A7. The physical layout of this pharmacy supports good workflow.                                                                                                | 65% | 69%   | 0.69 |
| <b>2. Teamwork</b> (Cronbach's $\alpha=0.44$ )                                                                                                                  | 81% | 84%   |      |
| A2. Staff treat each other with respect.                                                                                                                        | 79% | 86%   | 0.74 |
| A4. Staff in this pharmacy clearly understand their roles and responsibilities.                                                                                 | 81% | 90%   | 0.86 |
| A9. Staff work together as an effective team.                                                                                                                   | 82% | 77%   | 0.80 |
| <b>3. Staff Training and Skills</b> (Cronbach's $\alpha=0.75$ )                                                                                                 | 79% | 88%   |      |
| A3. Technicians in this pharmacy receive the training they need to do their jobs                                                                                | 81% | 87%   | 0.78 |
| A6. Staff in this pharmacy have the skills they need to do their jobs well.                                                                                     | 86% | 90%   | 0.86 |
| A8. Staff who are new to this pharmacy receive adequate orientation                                                                                             | 72% | 88%   | 0.86 |
| <b>4. Communication Openness</b> (Cronbach's $\alpha=0.57$ )                                                                                                    | 87% | 64%   |      |
| B1. Staff ideas and suggestions are valued in this pharmacy                                                                                                     | 81% | 64%   | 0.30 |
| B5. Staff feel comfortable asking questions when they are unsure about something                                                                                | 91% | 72%   | 0.88 |
| B10. It is easy for staff to speak up to their supervisor/ manager about patient safety concerns                                                                | 88% | 57%   | 0.52 |
| <b>5. Patient Counseling</b> (Cronbach's $\alpha=0.69$ )                                                                                                        | 90% | 57%   |      |
| B2. We encourage patients to talk to pharmacists about their medications.                                                                                       | 92% | 56%   | 0.80 |
| B7. Our pharmacists spend enough time talking to patients about how to use their medications                                                                    | 86% | 52%   | 0.94 |
| B11. Our pharmacists tell patients important information about their new prescriptions                                                                          | 93% | 63%   | 0.73 |
| <b>6. Staffing, Work Pressure, and Pace</b> (Cronbach's $\alpha=0.50$ )                                                                                         | 41% | 50%   |      |
| B3. Staff take adequate breaks during their shifts                                                                                                              | 56% | 60%   | 0.92 |
| B9. We feel rushed when processing prescriptions. (negatively worded)                                                                                           | 14% | 40%   | 0.81 |
| B12. We have enough staff to handle the workload.                                                                                                               | 56% | 62%   | 0.92 |
| B16. Interruptions/distractions in this pharmacy (from phone calls, faxes, customers, etc.) make it difficult for staff to work accurately. (negatively worded) | 40% | 37%   | 0.72 |
| <b>7. Communication About Prescriptions Across Shifts</b> (Cronbach's $\alpha=0.84$ )                                                                           | 81% | 79%   |      |
| B4. We have clear expectations about exchanging important prescription information across shifts                                                                | 84% | 83%   | 0.79 |
| B6. We have standard procedures for communicating prescription information across shifts.                                                                       | 78% | 77%   | 0.72 |
| B14. The status of problematic prescriptions is well communicated across shifts                                                                                 | 81% | 77%   | 0.76 |
| <b>8. Communication About Mistakes</b> (Cronbach's $\alpha=0.17$ )                                                                                              | 79% | 62%   |      |
| B8. Staff in this pharmacy discuss mistakes.                                                                                                                    | 74% | 50%   | 0.93 |
| B13. When patient safety issues occur in this pharmacy, staff discuss them.                                                                                     | 84% | 57%   | 0.73 |
| B15. In this pharmacy, we talk about ways to prevent mistakes from happening again.                                                                             | 81% | 78%   | 0.68 |
| <b>9. Response to Mistakes</b> (Cronbach's $\alpha=0.57$ )                                                                                                      | 79% | 65%   |      |
| C1. Staff are treated fairly when they make mistakes                                                                                                            | 80% | 81%   | 0.71 |
| C4. This pharmacy helps staff learn from their mistakes rather than punishing them                                                                              | 84% | 66%   | 0.84 |
| C7. We look at staff actions and the way we do things to understand why mistakes happen in this pharmacy.                                                       | 84% | 76%   | 0.86 |
| C8. Staff feel like their mistakes are held against them. (negatively worded)                                                                                   | 69% | 37%   | 0.66 |
| <b>10. Organizational Learning—Continuous Improvement</b> (Cronbach's $\alpha=0.48$ )                                                                           | 83% | 84%   |      |
| C2. When a mistake happens, we try to figure out what problems in the work process led to the mistake.                                                          | 90% | 90%   | 0.74 |
| C5. When the same mistake keeps happening, we change the way we do things                                                                                       | 82% | 81%   | 0.71 |
| C10. Mistakes have led to positive changes in this pharmacy                                                                                                     | 79% | 82%   | 0.76 |
| <b>11. Overall Perceptions of Patient Safety</b> (Cronbach's $\alpha=0.45$ )                                                                                    | 84% | 80%   |      |
| C3. This pharmacy places more emphasis on sales than on patient safety. (negatively worded)                                                                     | 80% | 79%   | 0.73 |
| C6. This pharmacy is good at preventing mistakes.                                                                                                               | 85% | 76%   | 0.94 |
| C9. The way we do things in this pharmacy reflects a strong focus on patient safety.                                                                            | 86% | 84%   | 0.68 |
| ICC, intra-class correlation coefficient                                                                                                                        |     |       |      |

## Comparative results

The results showed that there was a significant difference on seven dimensions between Third-grade hospital and Second-grade hospital ( $P < 0.05$ ). The positive response rate of five items of Third-grade hospitals was lower than that of Second-grade hospitals: (1) *This pharmacy is free of clutter* (2) *Our pharmacists spend enough time talking to patients about how to use their medications* (3) *Staff take adequate breaks during their shifts* (4) *We feel rushed when processing prescription* (5) *Interruptions/distractions in this pharmacy make it difficult for staff to work accurately* ( $P < 0.05$ ).

The positive response rate of other items of Third-grade hospitals was higher than that of Second-grade hospitals (Table 3).

Incidence of patient safety events was closely related to the qualification levels of pharmacists. Our results showed that there was a significant difference in the positive response rate on two dimensions (“*Staffing, Work Pressure, and Pace*” and “*Communication About Prescriptions Across Shifts*”,  $P < 0.05$ ) for senior pharmacists, junior pharmacists and pharmacy intern. Furthermore, the positive response rate of pharmacists with high qualification (senior pharmacists) was higher than those with low qualification level (junior pharmacists) on the two items: “*Staff take adequate breaks during their shifts*” and “*We have standard procedures for communicating prescription information across shifts*”  $P < 0.05$  (Table 3).

Table 3 The comparison of attitudes of different levels of hospitals and qualification of hospital pharmacists on patient safety culture

| Items                                                                                                            | Hospital Levels      |     |                       |     | $\chi^2$ | p     | Qualification Levels |     |                   |     |              |
|------------------------------------------------------------------------------------------------------------------|----------------------|-----|-----------------------|-----|----------|-------|----------------------|-----|-------------------|-----|--------------|
|                                                                                                                  | Third-grade Hospital |     | Second-grade Hospital |     |          |       | Senior Pharmacist    |     | Junior Pharmacist |     | Pharm Intern |
|                                                                                                                  | NPR                  | NOR | NPR                   | NOR |          |       | NPR                  | NOR | NPR               | NOR | NPR          |
| organized.                                                                                                       | 316                  | 41  | 123                   | 47  | 21.63    | 0.000 | 18                   | 2   | 355               | 66  | 66           |
| of clutter                                                                                                       | 171                  | 186 | 107                   | 63  | 10.45    | 0.001 | 12                   | 8   | 223               | 198 | 43           |
| this pharmacy supports good workflow.                                                                            | 236                  | 121 | 123                   | 47  | 2.07     | 0.15  | 16                   | 4   | 288               | 133 | 55           |
| with respect.                                                                                                    | 308                  | 49  | 141                   | 29  | 1.01     | 0.31  | 18                   | 2   | 360               | 61  | 71           |
| clearly understand their roles and responsibilities.                                                             | 321                  | 36  | 150                   | 27  | 0.34     | 0.56  | 19                   | 1   | 312               | 49  | 80           |
| an effective team.                                                                                               | 283                  | 74  | 116                   | 54  | 7.63     | 0.006 | 16                   | 4   | 321               | 100 | 62           |
| army receive the training they need to do their jobs                                                             | 308                  | 49  | 139                   | 31  | 1.82     | 0.18  | 14                   | 6   | 353               | 68  | 73           |
| have the skills they need to do their jobs well.                                                                 | 319                  | 38  | 150                   | 27  | 0.15     | 0.70  | 19                   | 1   | 376               | 45  | 74           |
| this pharmacy receive adequate orientation                                                                       | 309                  | 48  | 144                   | 26  | 0.33     | 0.57  | 17                   | 3   | 360               | 61  | 76           |
| ions are valued in this pharmacy                                                                                 | 220                  | 137 | 101                   | 69  | 0.24     | 0.63  | 16                   | 4   | 253               | 168 | 52           |
| ask the questions when they are unsure about something                                                           | 255                  | 102 | 110                   | 60  | 2.45     | 0.12  | 17                   | 3   | 289               | 132 | 59           |
| report up to their supervisor/ manager about patient safety concerns in this pharmacy.                           | 193                  | 164 | 92                    | 78  | 0.000    | 0.99  | 9                    | 11  | 232               | 189 | 44           |
| to talk to pharmacists about their medications.                                                                  | 192                  | 165 | 87                    | 83  | 0.31     | 0.58  | 14                   | 6   | 217               | 204 | 48           |
| I enough time talking to patients about how to use their medications                                             | 274                  | 83  | 137                   | 33  | 0.99     | 0.32  | 13                   | 7   | 231               | 208 | 46           |
| patients important information about their new prescriptions                                                     | 214                  | 143 | 94                    | 76  | 1.03     | 0.31  | 12                   | 8   | 247               | 174 | 49           |
| breaks during their shifts                                                                                       | 187                  | 170 | 121                   | 49  | 16.75    | 0.000 | 18                   | 2   | 245               | 176 | 45           |
| processing prescriptions. (negatively worded)                                                                    | 110                  | 247 | 87                    | 83  | 20.40    | 0.000 | 8                    | 12  | 153               | 268 | 36           |
| of to handle the workload.                                                                                       | 212                  | 145 | 202                   | 68  | 0.02     | 0.89  | 15                   | 5   | 251               | 170 | 48           |
| ons in this pharmacy (from phone calls, faxes, customers, etc.) make it difficult for<br>ly. (negatively worded) | 116                  | 241 | 71                    | 99  | 4.32     | 0.04  | 6                    | 14  | 147               | 274 | 34           |
| tion about exchanging important prescription information across shifts                                           | 171                  | 186 | 101                   | 69  | 6.11     | 0.01  | 17                   | 3   | 333               | 88  | 61           |
| ed for communicating prescription information across shifts.                                                     | 241                  | 116 | 126                   | 44  | 2.28     | 0.12  | 16                   | 4   | 303               | 118 | 48           |
| ation prescriptions is well communicated across shifts                                                           | 257                  | 100 | 126                   | 44  | 0.26     | 0.61  | 18                   | 2   | 307               | 114 | 58           |
| disorders mistakes.                                                                                              | 180                  | 177 | 72                    | 98  | 3.00     | 0.08  | 11                   | 9   | 201               | 220 | 40           |
| ssues occur in this pharmacy, staff discuss them.                                                                | 208                  | 149 | 84                    | 86  | 3.65     | 0.06  | 11                   | 9   | 233               | 188 | 48           |
| talk about ways to prevent mistakes from happening again.                                                        | 283                  | 74  | 116                   | 54  | 7.63     | 0.006 | 16                   | 4   | 319               | 102 | 64           |
| when they make mistakes                                                                                          | 287                  | 70  | 131                   | 39  | 0.78     | 0.38  | 17                   | 3   | 330               | 91  | 71           |
| staff learn from their mistakes rather than punishing them                                                       | 222                  | 135 | 120                   | 50  | 3.57     | 0.06  | 15                   | 5   | 275               | 146 | 52           |
| is and the way we do things to understand why mistakes happen in this pharmacy.                                  | 268                  | 89  | 117                   | 53  | 2.28     | 0.13  | 15                   | 5   | 313               | 108 | 57           |
| mistakes are held against them. (negatively worded)                                                              | 118                  | 239 | 68                    | 102 | 2.43     | 0.12  | 5                    | 15  | 152               | 269 | 29           |
| ns, we try to figure out what problems in the work process led to the mistake.                                   | 323                  | 34  | 145                   | 25  | 3.11     | 0.08  | 19                   | 1   | 371               | 50  | 78           |
| we know what is happening, we change the way we do things                                                        | 291                  | 66  | 127                   | 43  | 3.25     | 0.07  | 18                   | 2   | 335               | 86  | 65           |
| positive changes in this pharmacy                                                                                | 298                  | 59  | 118                   | 52  | 13.70    | 0.000 | 16                   | 4   | 337               | 84  | 63           |
| more emphasis on sales than on patient safety. (negatively worded)                                               | 274                  | 83  | 132                   | 38  | 0.05     | 0.82  | 17                   | 3   | 323               | 98  | 66           |
| at preventing mistakes.                                                                                          | 276                  | 81  | 116                   | 54  | 4.98     | 0.03  | 17                   | 3   | 315               | 106 | 60           |
| in this pharmacy reflects a strong focus on patient safety.                                                      | 306                  | 51  | 129                   | 41  | 7.73     | 0.005 | 19                   | 1   | 351               | 70  | 65           |
| es the patient and could cause harm but does not, how often is it documented?                                    | 200                  | 157 | 99                    | 71  | 0.23     | 0.63  | 12                   | 8   | 243               | 178 | 44           |
| es the patient but has no potential to harm the patient, how often is it documented?                             | 207                  | 150 | 95                    | 75  | 0.21     | 0.65  | 13                   | 7   | 246               | 175 | 43           |
| ould have harmed the patient is corrected before he medication, leaves pharmacy,<br>ented?                       | 209                  | 148 | 95                    | 75  | 0.33     | 0.56  | 14                   | 6   | 244               | 177 | 41           |

of positive response answers; NOR, Number of other response

## Patient safety grade in China and the US and different qualification levels

The percentage of staff who rated the level of patient safety as “good”, “very good” or “Excellent” was 79% in our study, which was lower than the US score of 95%, there was a significant difference between the two groups ( $P < 0.001$ ). While there was no significant difference on “Patient safety grade” in different qualification levels ( $P = 0.66$ ) (Table 4).

Table 4 The comparisons of patient safety grade between different position of hospital pharmacists

| Patient safety grade | Senior Pharmacist (%) | Junior Pharmacist (%) | Pharmacy Intern (%) | China (%) | US (%)  |
|----------------------|-----------------------|-----------------------|---------------------|-----------|---------|
| Excellent            | 2 <sup>a</sup> (6.5)  | 25(80.6)              | 4(12.9)             | 84(16)    | 191(40) |
| Very good            | 1(1.2)                | 69(85.2)              | 11(13.6)            | 227(43)   | 211(44) |
| Good                 | 6(5.6)                | 80(74.8)              | 21(19.6)            | 105(20)   | 53(11)  |
| Fair                 | 7(3.1)                | 184(81.4)             | 35(15.5)            | 79(15)    | 24(5)   |
| Poor                 | 4(4.9)                | 63(76.8)              | 15(18.30)           | 32(6)     | 0       |

<sup>a</sup> number of the respondents



## Reliability and validity

In our research, the Cronbach's alpha was of 0.89 for the questionnaire and ranged from 0.17 to 0.83 for dimensions. The dimension "*Communication About Mistakes*" had the lowest coefficients of 0.17 (Table 2). Yet in the US, the Cronbach's  $\alpha$  was ranged from 0.68 to 0.89 for dimensions of which "*Staffing, Work Pressure, and Pace*" had the lowest values of 0.68.

Bartlett's test of the 35 items on patient safety culture demonstrated a sufficient inter-item correlation:  $\chi^2 = 12037.98$ ,  $df = 595$ ,  $P < 0.01$ . Furthermore, the Kaiser–Meyer–Olkin measure of sampling adequacy was satisfactory, with a value of 0.935. Explorative factor analysis was performed using principal component analysis with varimax rotation drawing seven factors. The factors cumulatively explained 59 % of the variance in the survey and the result was acceptable.

Thirty-three participants answered twice to the questionnaire. For the 35 items, an ICC ranged from 0.30 to 0.94. Twenty-nine items had an ICC above 0.70, five items had an ICC between 0.50 and 0.70 and one item had an ICC under 0.50 (Table 2).

The inter-correlations of the 11 dimensions, and correlations between the scale scores were also calculated. No dimension had high correlations above 0.80, with other dimensions. "*Communication Openness*" and "*Patient Counseling*" ( $r = 0.74$ ) was most correlated, while "*Staffing, Work Pressure, and Pace*" and "*Overall Perceptions of Patient Safety*" ( $r = 0.01$ ) was least correlated. The highest intercorrelations was 0.78 between "*Communication Openness*" and the scale ( $r = 0.78$ ). The correlation between each dimension and the total scale were significantly different (Table 5).

Table 5 Correlation with the total scale and inter-correlations of the 11 dimensions

| Dimensions                                             | 1    | 2    | 3    | 4    | 5    | 6    | 7    | 8    | 9    | 10    | 11   | Total |
|--------------------------------------------------------|------|------|------|------|------|------|------|------|------|-------|------|-------|
| 1. Physical Space and Environment                      | 1.00 | 0.15 | 0.12 | 0.27 | 0.25 | 0.22 | 0.26 | 0.22 | 0.73 | 0.61  | 0.15 | 0.14* |
| 2. Teamwork                                            |      | 1.00 | 0.12 | 0.44 | 0.30 | 0.28 | 0.31 | 0.28 | 0.64 | 0.55  | 0.15 | 0.14* |
| 3. Staff Training and Skills                           |      |      | 1.00 | 0.39 | 0.34 | 0.33 | 0.44 | 0.33 | 0.56 | 0.44  | 0.09 | 0.16* |
| 4. Communication Openness                              |      |      |      | 1.00 | 0.74 | 0.63 | 0.37 | 0.57 | 0.37 | 0.36  | 0.03 | 0.78* |
| 5. Patient Counseling                                  |      |      |      |      | 1.00 | 0.70 | 0.70 | 0.70 | 0.20 | 0.02  | 0.05 | 0.76* |
| 6. Staffing, Work Pressure, and Pace                   |      |      |      |      |      | 1.00 | 0.68 | 0.69 | 0.02 | -0.05 | 0.01 | 0.77* |
| 7. Communication About Prescriptions<br>Across Shifts  |      |      |      |      |      |      | 1.00 | 0.68 | 0.20 | 0.05  | 0.07 | 0.75* |
| 8. Communication About Mistakes                        |      |      |      |      |      |      |      | 1.00 | 0.20 | -0.05 | 0.10 | 0.77* |
| 9. Response to Mistakes                                |      |      |      |      |      |      |      |      | 1.00 | 0.32  | 0.04 | 0.17* |
| 10. Organizational Learning—<br>Continuous Improvement |      |      |      |      |      |      |      |      |      | 1.00  | 0.12 | 0.18* |
| 11. Overall Perceptions of Patient Safety              |      |      |      |      |      |      |      |      |      |       | 1.00 | 0.13* |

\*All correlations are significant at  $P < 0.001$

1  
2  
3  
4  
5  
6  
7  
8  
9  
10  
11  
12  
13  
14  
15  
16  
17  
18  
19  
20  
21  
22  
23  
24  
25  
26  
27  
28  
29  
30  
31  
32  
33  
34  
35  
36  
37  
38  
39  
40  
41  
42  
43  
44  
45  
46  
47  
48  
49  
50  
51  
52  
53  
54  
55  
56  
57  
58  
59  
60

Finally, table 6 presented the factor loadings for each item (all loadings > 0.30). Factor one loadings on five dimensions, and factor two loading on three dimensions (*“Physical Space and Environment”*, *“Teamwork”* and *“Staff Training and Skills”*), and factor three on *“Overall Perceptions of Patient Safety”*.

For peer review only

Table 6 Factors loading in each item

| Items                                                                                                                                                          | 1    | 2    | 3     | 4    | 5     | 6    | 7     |
|----------------------------------------------------------------------------------------------------------------------------------------------------------------|------|------|-------|------|-------|------|-------|
| 1. This pharmacy is well organized.                                                                                                                            |      | 0.78 |       |      |       |      |       |
| 2. This pharmacy is free of clutter                                                                                                                            |      | 0.55 |       |      |       |      |       |
| 3. The physical layout of this pharmacy supports good workflow.                                                                                                |      | 0.72 |       |      |       |      |       |
| 4. Staff treat each other with respect.                                                                                                                        |      | 0.82 |       |      |       |      |       |
| 5. Staff in this pharmacy clearly understand their roles and responsibilities.                                                                                 |      | 0.47 |       |      |       |      | 0.30  |
| 6. Staff work together as an effective team.                                                                                                                   |      | 0.80 |       |      |       |      |       |
| 7. Technicians in this pharmacy receive the training they need to do their jobs                                                                                |      | 0.41 |       |      |       |      |       |
| 8. Staff in this pharmacy have the skills they need to do their jobs well.                                                                                     |      | 0.41 |       |      |       |      |       |
| 9. Staff who are new to this pharmacy receive adequate orientation                                                                                             |      | 0.66 |       |      |       |      |       |
| 10. Staff ideas and suggestions are valued in this pharmacy                                                                                                    | 0.73 |      |       |      |       |      |       |
| 11. Staff feel comfortable asking questions when they are unsure about something                                                                               | 0.97 |      |       |      |       |      |       |
| 12. It is easy for staff to speak up to their supervisor/ manager about patient safety concerns in this pharmacy.                                              | 0.95 |      |       |      |       |      |       |
| 13. We encourage patients to talk to pharmacists about their medications.                                                                                      | 0.96 |      |       |      |       |      |       |
| 14. Our pharmacists spend enough time talking to patients about how to use their medications                                                                   | 0.96 |      |       |      |       |      |       |
| 15. Our pharmacists tell patients important information about their new prescriptions                                                                          | 0.61 |      |       |      |       |      |       |
| 16. Staff take adequate breaks during their shifts                                                                                                             | 0.73 |      |       |      |       |      |       |
| 17. We feel rushed when processing prescriptions. (negatively worded)                                                                                          | 0.92 |      |       |      |       |      |       |
| 18. We have enough staff to handle the workload.                                                                                                               | 0.61 |      |       |      |       |      |       |
| 19. Interruptions/distractions in this pharmacy (from phone calls, faxes, customers, etc.) make it difficult for staff to work accurately. (negatively worded) | 0.94 |      |       |      |       |      |       |
| 20. We have clear expectations about exchanging important prescription information across shifts                                                               | 0.73 |      |       |      |       |      |       |
| 21. We have standard procedures for communicating prescription information across shifts.                                                                      | 0.72 |      |       |      |       |      |       |
| 22. The status of problematic prescriptions is well communicated across shifts                                                                                 | 0.96 |      |       |      |       |      |       |
| 23. Staff in this pharmacy discuss mistakes.                                                                                                                   | 0.74 |      |       |      |       |      |       |
| 24. When patient safety issues occur in this pharmacy, staff discuss them.                                                                                     | 0.60 |      |       |      |       |      |       |
| 25. In this pharmacy, we talk about ways to prevent mistakes from happening again.                                                                             | 0.53 |      |       |      |       |      |       |
| 26. Staff are treated fairly when they make mistakes                                                                                                           |      |      |       | 0.92 |       |      |       |
| 27. This pharmacy helps staff learn from their mistakes rather than punishing them                                                                             |      | 0.65 |       |      |       |      |       |
| 28. We look at staff actions and the way we do things to understand why mistakes happen in this pharmacy.                                                      |      | 0.68 |       |      |       |      |       |
| 29. Staff feel like their mistakes are held against them. (negatively worded)                                                                                  |      | 0.41 |       |      | 0.54  |      |       |
| 30. When a mistake happens, we try to figure out what problems in the work process led to the mistake.                                                         |      |      |       |      | -0.75 |      |       |
| 31. When the same mistake keeps happening, we change the way we do things                                                                                      |      | 0.69 |       |      |       |      |       |
| 32. Mistakes have led to positive changes in this pharmacy                                                                                                     |      |      |       | 0.91 |       |      |       |
| 33. This pharmacy places more emphasis on sales than on patient safety. (negatively worded)                                                                    |      |      | -0.71 |      |       |      |       |
| 34. This pharmacy is good at preventing mistakes.                                                                                                              | 0.39 | 0.71 |       |      |       |      |       |
| 35. The way we do things in this pharmacy reflects a strong focus on patient safety.                                                                           |      | 0.43 |       |      |       | 0.33 | -0.35 |

## Discussion

The study is the first publication of its kind using the PSOPSC to explore patient culture in hospital pharmacy sector. It is, furthermore, the first Chinese study to report data on perspectives of patient culture in different levels of qualification and hospital in pharmacy setting. The PSOPSC has been introduced by AHRQ for about one year which was only conducted for pilot study in US pharmacies.[20] We adopted this survey in our research, because we take the consideration that this is a very comprehensive patient safety culture survey focused on the pharmacy sector which is best suitable for examining patient safety climate from a hospital pharmacy perspective. Moreover, the survey will enable the pharmacies to assess areas of strength and identify areas for improvement in their patient safety culture as part of their quality improvement activities.

In our study, the response rate was 84% which was higher than the pilot study implemented in US (75%).[20] A high response rate on a questionnaire about safety attitudes might be a measure of the staff's attentiveness to these issues.[22] Overall, the mean positive response rate for the 11 patient safety culture dimensions of the PSOPSC survey was 71%, slightly higher than the other two studies conducted in Taiwan by Chen 2012[23] and the mainland of China by Nie 2013.[4] Comparing with these two studies, we found that the three studies have a common feature that they predominantly used surveys to assess individual attitudes covering areas related to work environment, adherence to guidelines and safety concerns.[24] The only difference is that Chen and Nie used the Hospital Survey on Patient Safety Culture (HSPSC) for all health care workers within organizational level, while we

1  
2 used PSOPSC for hospital pharmacy workers which thereby, elicits a snapshot of the safety climate in  
3  
4 the specific setting. Meanwhile, in some other studies, the pharmacists surveyed were relatively in a  
5  
6 small size in their study populations, such as the HSPSC study in Japan by Shinya Ito, 155(2.4%)  
7  
8 pharmacists were included,[11] and the HSPSC study in US by Joann S Sorra, 1215(2%) pharmacists  
9  
10 were included.[12]  
11  
12

13  
14  
15 Our study found that there was substantial variability in the percent of positive scores across  
16  
17 11 dimensions. The dimension “*Staff Training and Skill*” appeared to receive the highest positive  
18  
19 response rate (88%). An explanation for this might be the fact that the national job training project for  
20  
21 pharmacists in China named ‘*Clinical Pharmacist pilot Training*’ for a long time put great effort into  
22  
23 providing clinical pharmacy training for pharmacists who are working or will work as clinical  
24  
25 pharmacists from different hospitals.[25] But another possible reason is that the relatively high  
26  
27 proportion of positive responses might be that the translation was inadequate, and that a ceiling effect  
28  
29 occurred.[10] Simultaneously, the dimension “*Teamwork*” received a positive response rate of 84% in  
30  
31 our study, which is similar to the studies reported by Belgium,[14] Turkey,[26] Swedish,[10] US,[27],  
32  
33 China[4] and Taiwan[23] ( 70%,76%,78%,80%,84%,and 94% ,respectively). The interpretation of the  
34  
35 results within a given setting is that if  $\geq 80\%$  of the respondents report positive assessments on a  
36  
37 specific item or set of items, then there is a strong positive consensus in that setting.[10] A score of  
38  
39 less than 60% is considered to be in the "needs improvement," range.[10] Hence,  $\geq 60\%$  is a  
40  
41 threshold for which safety climate can be considered acceptable. Hooly, we can conclude that the  
42  
43  
44  
45  
46  
47  
48  
49  
50  
51  
52  
53  
54  
55  
56  
57  
58  
59  
60

1  
2 respondents were delight in cooperating with others and well functioning relative to hospital  
3  
4 departments.  
5  
6

7  
8 This study displayed that both in China and US, the dimensions that received the lowest positive  
9  
10 rate was “*Staffing, Work Pressure, and Pace*”(50% and 41%, respectively), indicating that the  
11  
12 respondents feel that staff allocation is not adequate to handle patient safety related workload.[4] Our  
13  
14 results are according with those reported by Hellings and the study conducted in Taiwan and China.  
15  
16 [4,14,23,28] Meanwhile, a study by Elisa E in Northern California hospital of US showed that the  
17  
18 most common causes of medication errors were high workload (25.3%), fatigue or lack of sleep  
19  
20 (16.5%).[29] Therefore it is important for pharmacy to allocate staffs and working hours more  
21  
22 adequately to reduce the medication errors and improve patient safety. In addition, in our study,  
23  
24 another relatively low positive response rate was the dimension “*Patient Counseling*” (57%) which  
25  
26 reflected the problem in China: poor doctor-patient communication. A study by Zou in China  
27  
28 indicated that 49% medical lawsuits related to poor doctor-patient communication.[30] A study by  
29  
30 Moore P showed that of 635 complaints involved a doctor, 49 cases (15%) were because of "Lack of  
31  
32 communication".[31] Lack of ‘communication openness’ was identified as a major safety culture  
33  
34 problem. In other words, communication openness was seriously jeopardised by the lack of trust  
35  
36 between health workers and patients in China reported by Liu in the recent study.[32]  
37  
38  
39  
40  
41  
42  
43  
44  
45  
46  
47

48 The results showed that the positive response numbers of Third-grade hospital regarding  
49  
50 patient safety culture was higher than that of Second-grade hospital. The reason account for this may  
51  
52  
53  
54  
55  
56  
57  
58  
59  
60

1  
2 be that in China, the Third-grade hospital always manage severe clinical cases so the pharmacies of  
3  
4  
5 Third-grade hospital have a higher potential for life-threatening medical errors. As most risky medical  
6  
7  
8 interventions take place in these hospitals, the staff have to get better training to deal with in  
9  
10 safety-related issues.[26] Simultaneously, our study found that the positive response rate of  
11  
12 pharmacists with high qualification (senior pharmacists) was higher than those with low qualification  
13  
14 level (junior pharmacists ) on the dimension “*Staffing, Work Pressure, and Pace*”. Seniority has been  
15  
16 found to bring about experience,[22] as they know the pitfalls of the pharmacy work and can avoid  
17  
18 them masterly which might reduce the risk for error making, so senior pharmacists might work more  
19  
20 effectively and had a positive attitude to their work pressure. This was also elucidated in the study by  
21  
22 Sorlie V that the more experience physicians gained, the more confident they would feel.[33] So we  
23  
24 can infer that the experiential proficiency is a prerequisite to this higher positive response.  
25  
26  
27  
28  
29  
30  
31

32 The pharmacy is an important link between the patient and medication, so developing a culture  
33  
34 of safety has become one of the pillars of the pharmacy. According to the report of China Food and  
35  
36 Drug Administration(CFDA), a total of 852,799 drug adverse events happened in China in 2011.[7]  
37  
38 Chinese Hospital Association (CHA) estimated that adverse events affect 1.6 ~ 7.6 million  
39  
40 hospitalizations annually in Chinese hospitals.[34] A study by Li,XL showed that 1165 medication  
41  
42 errors reported by 22 hospitals in Beijing in 2012[35]and another study by Li,XY in China indicating  
43  
44 that 32 (26.30%) dispensing errors were applied to the pharmacists and 5 (4.03%) dispensing errors  
45  
46 were related to the environment of the pharmacy.[36] The adaptation of this instrument to the Chinese  
47  
48  
49  
50  
51  
52  
53  
54  
55  
56  
57  
58  
59  
60



1  
2  
3 pharmacy context not only is an important milestone for safety research in pharmacies but also  
4  
5 provides the pharmacies with an instrument that generates diagnostic and actionable information for  
6  
7 pharmacies and leaders to use in guiding improvement efforts.[37] The findings of the study  
8  
9 illustrated that the pharmacies and health care organizations in China should have imperatives to  
10  
11 develop strategies to improve pharmacy service quality and ensure patient safety. These strategies  
12  
13 include: strengthen patient safety training for pharmacy staffs, reasonable allocate staff and workload,  
14  
15 creating an environment conducive to reporting errors by focusing on the process or system failure  
16  
17 instead of the individual who committed the error.[38] What's more, we should raise awareness of the  
18  
19 important of patient engagement in improving medication safety because a global concerted effort is  
20  
21 need to address medication safety and it needs the involvement of all health-care stakeholders,  
22  
23 including patient. In addition, building trust between providers and patients and between managers  
24  
25 and health workers is essential for empowering health workers to address patient safety issues.[32]  
26  
27  
28  
29  
30  
31  
32  
33

### 34 **Reliability**

35  
36 Using Cronbach's  $\alpha$ , all subscales had acceptable levels of reliability, which varied from 0.84 for  
37  
38 "*Communication About Prescriptions Across Shifts*" to 0.44 for "*Teamwork*", with the exception of  
39  
40 the dimension "*Communication about Mistakes*" which had the lowest value 0.17. The results were  
41  
42 less satisfactory as compared to AHRQ data.[20] The dimension "*Communication about Mistakes*"  
43  
44 received the lowest Cronbach's  $\alpha$  among the 11 dimensions, three reasons could account for  
45  
46  
47  
48  
49 this. Firstly, a possible explanation was the translation, scale should not be translated and applied in  
50  
51  
52  
53  
54  
55  
56  
57  
58  
59  
60

1  
2 another setting of a different cultural context directly.[4] Secondly, factor structure of the PSOPSC  
3  
4  
5 model for these items might not fit the data well.[23] Thirdly, the sample size of the data might not be  
6  
7  
8 large enough to achieve consistency.[23] But, the low reliability also suggested the instability of the  
9  
10 aspects measured by the questionnaire, which are based on professionals' perceptions of safety  
11  
12 (themselves linked to safety circumstances at a given time, and inherently instable and subject to  
13  
14  
15 change). If culture does not change so rapidly, perceptions do.[21]  
16  
17  
18  
19

## 20 **Conclsion**

21  
22 The results demonstrated that among the pharmacy staff surveyed in China there was a positive  
23  
24 attitudes towards patient safety culture in their organizations. The Chinese translation of PSOPSC  
25  
26  
27 questionnaire (version 2012) used in our study was acceptable.  
28  
29

## 30 **Footnotes**

## 31 **Acknowledgement**

32  
33  
34 Thanks for all the respondents who took part in this study. Thanks Prof.Kang Deying for his statistical  
35  
36  
37 support and Miss Kathren Sieminski for her help with English revising.  
38  
39  
40

## 41 **Contributors**

42  
43  
44 MMZ conceptualized and designed the study. PLJ and LHZ performed and interpreted the data  
45  
46  
47 analysis. MMZ and PLJ drafted and revised the manuscript critically for intellectual content. The rest  
48  
49  
50 of authors did data collection and checked data input. All authors read and approved the final  
51  
52  
53  
54  
55  
56  
57  
58  
59  
60

1  
2 manuscript.

3  
4  
5 **Competing interests**

6  
7 None

8  
9  
10 **Funding**

11  
12 This project was supported by National Natural Science foundation NO.70973083

13  
14  
15 **Data sharing statement**

16  
17 No additional data are available.

18  
19  
20 **Reference**

- 21  
22  
23 1 Bond CA, Raehl CL, Franke T. Clinical pharmacy services, hospital pharmacy staffing, and  
24 medication errors in United States hospitals. *Pharmacotherapy* 2002;22:134-47.  
25  
26  
27 2 Kaushal R, Shojania KG, Bates DW. Effects of computerized physician order entry and clinical  
28 decision support systems on medication safety. *Arch Intern Med* 2003;163:1409-16.  
29  
30  
31 3 Kelly WN. Potential risks and prevention, part 4: Reports of significant adverse drug events. *Am J*  
32  
33 *Health Syst Pharm* 2001;58:1406-12.  
34  
35  
36 4 Nie YL, Mao XY, Cui H, et al. Hospital survey on patient safety culture in China. *BMC Health Serv*  
37  
38 *Res* 2013;13:228.  
39  
40  
41 5 Benjamin DM. Reducing Medication Errors and Increasing Patient Safety: Case Studies in Clinical  
42  
43 Pharmacology. *J Clin Pharmacol* 2003;43:768-83  
44  
45  
46  
47  
48  
49 6 Patel I, Balkrishnan R. Medication error management around the globe: An overview. *Indian J*  
50  
51  
52  
53  
54  
55  
56  
57  
58  
59  
60

1  
2  
3 *Pharm Sci* 2010;72:539-45.

4  
5 7 The national annual report of adverse drug reaction monitoring in 2011.

6  
7  
8 <http://www.sda.gov.cn/WS01/CL0078/72193.html> (accessed May 2012)

9  
10 8 Hartigan-Go K. Developing a pharmacovigilance system in the Philippines, a country of diverse  
11  
12 culture and strong traditional medicine background. *Toxicology* 2002;181-182:103-7.

13  
14  
15 9 Westat R, Martha F, Joann S. Pharmacy Survey on Patient Safety Culture: User's Guide.( Prepared  
16  
17 by Rockville, MD 20850 Contract No. HHS290200710024C). AHRQ Publication No.

18  
19  
20 12(13)-0085: Agency for Healthcare Research and Quality, 2012.

21  
22  
23 <http://www.ahrq.gov/professionals/quality-patient-safety/patientsafetyculture/pharmacy/index.html>

24  
25  
26 10 Norden-Hägg A, Sexton J, Källemark-Sporrong S, et al. Assessing safety culture in pharmacies:

27  
28  
29 The psychometric validation of the Safety Attitudes Questionnaire (SAQ) in a national sample of  
30  
31 community pharmacies in Sweden. *BMC Pharmacol Toxicol* 2010;10:8.

32  
33  
34 11 Ito S, Seto K, Kigawa M, et al. Development and applicability of Hospital Survey on Patient

35  
36  
37 Safety Culture (HSOPS) in Japan. *BMC Health Serv Res* 2011;11:28.

38  
39  
40 12 Sorra JS, Dyer N. Multilevel psychometric properties of the AHRQ hospital survey on patient

41  
42  
43 safety culture. *BMC Health Serv Res* 2010;10:199.

44  
45  
46 13 Singer SJ, Gaba DM, Geppert JJ, et al. The culture of safety: results of an organization-wide

47  
48  
49 survey in 15 California hospitals. *Qual Saf Health Care* 2003;2:112-8.

50  
51  
52 14 Hellings J, Schrooten W, Klazinga N, et al. Challenging patient safety culture: survey results. *Int J*

1  
2  
3  
4  
5  
6  
7  
8  
9  
10  
11  
12  
13  
14  
15  
16  
17  
18  
19  
20  
21  
22  
23  
24  
25  
26  
27  
28  
29  
30  
31  
32  
33  
34  
35  
36  
37  
38  
39  
40  
41  
42  
43  
44  
45  
46  
47  
48  
49  
50  
51  
52  
53  
54  
55  
56  
57  
58  
59  
60

*Health Care Qual Assur* 2007;20:620-32.

15 Nieva VF, Sorra J. Safety culture assessment: A tool for improving patient safety in healthcare organizations. *Qual Saf Health Care* 2003;12:ii17-ii23.

16 Kanse L, Schaaf TW Van Der, Vrijland ND, et al. Error recovery in a hospital pharmacy. *Ergonomics* 2006;49:503-16.

17 Phipps DL, De Bie J, Herborg H, et al. Evaluation of the Pharmacy Safety Climate Questionnaire in European community pharmacies. *Int J Qual Health Care* 2012;24:16-22.

18 Ashcroft DM, Morecroft C, Parker D, et al. Safety culture assessment in community pharmacy: development, face validity, and feasibility of the Manchester Patient Safety Assessment Framework *Qual Saf Health Care* 2005;14:417-21.

19 Ashcroft DM, Parker D. Development of the Pharmacy Safety Climate Questionnaire: a principal components analysis. *Quality and Safety in Health Care* 2009;18:28-31.

20 Westat, Rockville. 2012 Preliminary Comparative Results: Pharmacy Survey on Patient Safety Culture. (Prepared by Westat, Rockville Contract No. HHSA 290200710037). AHRQ Publication No. 12-0085-1-EF: U.S. Department of Health and Human Services, 2012.  
<http://www.ahrq.gov/professionals/quality-patient-safety/patientsafetyculture/pharmacy/index.html>

21 Occelli P, Quenon JL, Kret M et al. Validation of the French version of the Hospital Survey on Patient Safety Culture questionnaire. *Int J Qual Health Care* 2013;25:459-68.

22 Norden-Hagg A, Kalvemark-Sporrong S, Lindblad AK. Exploring the relationship between safety

1  
2 culture and reported dispensing errors in a large sample of Swedish community pharmacies. *BMC*  
3  
4  
5 *Pharmacol Toxicol* 2012;13:4.  
6

7  
8 23 Chen IC, Li H-H. Measuring patient safety culture in Taiwan using the Hospital Survey on Patient  
9  
10 Safety Culture (HSOPSC). *BMC Health Serv Res* 2010;10:152.  
11

12  
13 24 Colla JB, Bracken AC, Kinney LM, et al. Measuring patient safety climate: a review of surveys.  
14  
15 *Qual Saf Health Care* 2005;14:364-6.  
16

17  
18 25 Ning-Jiang Bao, Hong Shao, Xiao-Yan Nie, et al. Analysis of the status of clinical pharmacist pilot  
19  
20 training in Chinese hospitals. *Chinese Pharmaceutical Sciences* 2011;20:410-14.  
21  
22

23  
24 26 Bodur S, Filiz E. A survey on patient safety culture in primary healthcare services in Turkey. *Int J*  
25  
26 *Qual Health Care* 2009;21:348-55.  
27

28  
29 27 Joann S, Theresa F, Naomid D, et al. 2012 User Comparative Database Report: Hospital Survey on  
30  
31 Patient Safety Culture.( Prepared by Westat, Rockville, MD under Contract No. HHSA  
32  
33 290200710024C). Agency for Healthcare Research and Quality,January 2012  
34  
35  
36  
37 <http://www.ahrq.gov/professionals/quality-patient-safety/patientsafetyculture/hospital/2012/index.html>  
38

39  
40 28 Zhu J, Li L, Li Y, et al. What constitutes patient safety culture in Chinese hospitals. *Int J Qual*  
41  
42 *Health Care* 2012;24:250-57.  
43

44  
45 29 Nguyen EE, Connolly PM, Wong V. Medication safety initiative in reducing medication errors. *J*  
46  
47 *Nurs Care Qual* 2010;25:224-30.  
48

49  
50 30 Zou B,Zhao S. The application analysis of communication skill in reconstructing the harmonious  
51  
52  
53  
54  
55  
56  
57  
58  
59  
60

- 1  
2  
3 doctor-patient relationship. *The Journal of Medical Theory and Practice* 2013;26:1676-78.  
4  
5 31 Moore p, Vargas A, Núñez S, et al. A study of hospital complaints and the role of the  
6  
7 doctor-patient communication. *Rev Med Chil* 2011;139:880-5.  
8  
9  
10 32 Liu C, Liu W, Wang Y, et al. Patient safety culture in China: a case study in an outpatient setting  
11  
12 in Beijing. *BMJ Qual Saf* 2013;0:1-9.  
13  
14  
15 33 Sorlie V, Lindseth A, Uden G, et al. Women physicians' narratives about being in ethically difficult  
16  
17 care situations in paediatrics. *Nurs Ethics* 2000;7:47-62.  
18  
19  
20  
21 34 Cao RG. Medical quality and patient safety in China. *Chinese Hospitals* 2007;11:1-4.  
22  
23  
24 35 Li XL, Yan SY, Wang YQ, et al. Analysis of 1165 medication errors among 22 hospitals in Beijing.  
25  
26  
27 *Adverse Drug Reactions Journal* 2013;2:64-68.  
28  
29  
30 36 Li XY, Lai BL, Li SL, et al. Error analysis of hospital outpatient pharmacy from 2010 to 2011.  
31  
32  
33 *Pharmacy Today* 2012;8:496-97.  
34  
35 37 Sexton JB, Paine LA, Manfuso J, et al. A culture check-up for safety in “my patient care area”  
36  
37  
38 *Jt Comm J Qual Patient Saf* 2007;33:699-703.  
39  
40 38 Hughes RG, Clancy CM. Working conditions that support patient safety. *J Nurs Care Qual*  
41  
42  
43 2005;20:289-92.  
44  
45  
46  
47  
48  
49  
50  
51  
52  
53  
54  
55  
56  
57  
58  
59  
60

# BMJ Open

## Safety Culture in Pharmacy Setting Using Pharmacy Survey on Patient Safety Culture: A Cross-sectional Study in China

|                                 |                                                                                                                                                                                                                                                                                                                                                                                                                                                                                                                                                                                                                                                                                                                                             |
|---------------------------------|---------------------------------------------------------------------------------------------------------------------------------------------------------------------------------------------------------------------------------------------------------------------------------------------------------------------------------------------------------------------------------------------------------------------------------------------------------------------------------------------------------------------------------------------------------------------------------------------------------------------------------------------------------------------------------------------------------------------------------------------|
| Journal:                        | <i>BMJ Open</i>                                                                                                                                                                                                                                                                                                                                                                                                                                                                                                                                                                                                                                                                                                                             |
| Manuscript ID:                  | bmjopen-2014-004904.R1                                                                                                                                                                                                                                                                                                                                                                                                                                                                                                                                                                                                                                                                                                                      |
| Article Type:                   | Research                                                                                                                                                                                                                                                                                                                                                                                                                                                                                                                                                                                                                                                                                                                                    |
| Date Submitted by the Author:   | 22-May-2014                                                                                                                                                                                                                                                                                                                                                                                                                                                                                                                                                                                                                                                                                                                                 |
| Complete List of Authors:       | Jia, Pengli; Chinese Evidence-Based Medicine, West China Hospital, Sichuan University,<br>Zhang, Longhao; Chinese Evidence-Based Medicine, West China Hospital, Sichuan University,<br>Zhang, Mingmig; WHO patient for patient safety champion, Chinese Evidence-Based Medicine, West China Hospital, Sichuan University,<br>Zhang, Linli; West China Second University Hospital, Department of Pharmacy<br>Zhang, Chuan; West China Second University Hospital, Department of Pharmacy<br>Qin, Shengfang; Sichuan Provincial Hospital for Women and Children, Department of Fetal Medicine<br>Li, Xinli; The Sixth Chengdu Hospital, Department of Pharmacy<br>Liu, Kexin; West China Hospital, Sichuan University, Department of Pharmacy |
| <b>Primary Subject Heading</b>: | Global health                                                                                                                                                                                                                                                                                                                                                                                                                                                                                                                                                                                                                                                                                                                               |
| Secondary Subject Heading:      | Health services research                                                                                                                                                                                                                                                                                                                                                                                                                                                                                                                                                                                                                                                                                                                    |
| Keywords:                       | Quality in health care < HEALTH SERVICES ADMINISTRATION & MANAGEMENT, Organisation of health services < HEALTH SERVICES ADMINISTRATION & MANAGEMENT, International health services < HEALTH SERVICES ADMINISTRATION & MANAGEMENT, HEALTH SERVICES ADMINISTRATION & MANAGEMENT                                                                                                                                                                                                                                                                                                                                                                                                                                                               |
|                                 |                                                                                                                                                                                                                                                                                                                                                                                                                                                                                                                                                                                                                                                                                                                                             |

SCHOLARONE™  
Manuscripts



**Title page**

**Manuscript title:** Safety Culture in Pharmacy Setting Using Pharmacy Survey on Patient Safety  
Culture: A Cross-sectional Study in China

**Running title:** Patient Safety Culture in Pharmacy Setting

**Names and affiliations of contributing authors:**

PL Jia<sup>1#</sup>, LH Zhang<sup>1#</sup>, MM Zhang<sup>1§</sup>, LL Zhang<sup>2</sup>, C Zhang<sup>2</sup>, SF Qin<sup>3</sup>, XL Li<sup>4</sup>, KX Liu<sup>5</sup>

# Equal contributors

§Corresponding author

Pengli Jia (PLJ): Research assistant, Chinese Evidence-Based Medicine, West China Hospital,

Sichuan University, Chengdu 610041 P R China. Equal-First authors

Longhao Zhang (LHZ): Research assistant, Chinese Evidence-Based Medicine, West China Hospital,

Sichuan University, Chengdu 610041 P R China. Equal-First authors

Mingming Zhang (MMZ): MSc. Professor and WHO patient for patient safety champion, Chinese Evidence-Based Medicine, West China Hospital, Sichuan University, Chengdu 610041 P R China.

Corresponding author

Linli Zhang (LLZ): Professor, Department of Pharmacy, West China Second University Hospital, Chengdu 610041 P R China.

Chuan Zhang (CZ): Senior Pharmacist, Department of Pharmacy, West China Second University Hospital, Chengdu 610041 P R China.

Shengfang Qin (SFQ): Associated Professor, Department of Fetal Medicine, Sichuan Provincial Hospital for Women and Children, Chengdu 610045 P R China

1 Xinli Li (XLL): Associated Professor, Department of Pharmacy, The Sixth Chengdu Hospital, 610051

2  
3 P R China

4  
5 Kexin Liu (KXL): Pharmacist, Department of Pharmacy, West China Hospital, Sichuan University,

6  
7 Chengdu 610041 P R China.

8  
9  
10 **Correspondence details for corresponding author:**

11  
12 Prof. Mingming Zhang, Chinese Evidence-Based Medicine Centre, West China Hospital

13  
14 Sichuan University, Chengdu 610041. P.R. China.

15  
16  
17 Tel: 86-28-85422079

18  
19  
20 Fax: 86-28-85422253

21  
22 E-mail: mingming-zhang@163.com

23  
24 **Key words:** Patient safety; Safety culture; Pharmacists; Surveys

25  
26  
27 **Word count:4556**

## Abstract

**Objective** To explore the attitudes and perceptions of patient safety culture for pharmacy workers in China by using a Pharmacy Survey on Patient Safety Culture (PSOPSC), and to assess the psychometric properties of the translated Chinese-language version of the PSOPSC.

**Design** Cross-sectional study.

**Participants** Data were obtained from 20 hospital pharmacies in southwest part of China.

**Method** Chi-Square test was performed to explore the differences on pharmacy staff in different hospital and qualification levels and countries towards patient safety culture. We also computed descriptive statistics, internal consistency coefficients and inter-subscale correlation analysis, then conducted a exploratory factor analysis. A test-retest was performed to assess reproducibility of the items.

**Result** A total of 630 questionnaires were distributed of which 527 were responded validly (response rate 84 %). The positive response rate for each item ranged from 37% to 90%. The positive response rate on three dimensions (“*Teamwork*”, “*Staff Training and Skills*” and “*Staffing, Work Pressure, and Pace*”) was higher than that of Agency for Healthcare Research and Quality(AHRQ) data ( $P<0.05$ ). There was a statistical difference on the perception of patient safety culture in different hospital and qualification levels. The internal consistency of the total survey was comparatively satisfied (Cronbach’s  $\alpha=0.89$ ).

**Conclusion** The results demonstrated that among the pharmacy staffs surveyed in China, there was a positive attitudes towards patient safety culture in their organizations. Identifying perspectives of patient safety culture from pharmacists in different hospital and qualification levels are

1  
2 important,since this can help support decisions about action to improve safety culture at pharmacy  
3 settings. The Chinese translation of PSOPSC questionnaire (version 2012) applied in our study is  
4 acceptable.  
5  
6

## 7 8 9 **Strengths and limitations of this study**

- 10  
11 • This is the first kind of study that was conducted in China measuring patient safety culture in  
12 pharmacy setting. The results of this study may provide some evidence to help healthcare decision  
13 makers or policy makers in pharmacy settings from developing countries to develop effective  
14 strategies to assess areas of strength and identify areas for improvement in their patient safety  
15 culture as part of their quality improvement activities.  
16  
17
- 18 Findings might be limited by selection bias as pharmacies were selected on a convenient basis. Our  
19 study was carried out only in the Second-grade and Third-grade hospitals which may not reflect the  
20 whole picture of patient safety culture in China. Meanwhile, this is the first kind of study using  
21 PSOPSC to measure safety culture in pharmacy setting, there are no similar studies from benchmark  
22 scores using PSOPSC for us to compare with, so the external comparison was restrictive. Finally,  
23 because of small sample numbers included in our study and because our primary objective is to  
24 explore the attitudes and perceptions of patient safety culture for pharmacy workers, we did not  
25 conduct confirmatory factor analysis to test hypotheses about a particular factor structure.  
26  
27  
28  
29  
30  
31  
32  
33  
34  
35  
36  
37  
38  
39  
40  
41  
42  
43  
44  
45  
46  
47  
48  
49  
50  
51  
52  
53  
54  
55  
56  
57  
58  
59  
60

## Background

Medication errors are the largest component of medical errors accounting for about a quarter of the incidents which threaten patient safety.[1] An estimated 770000 people are injured or die in hospitals from adverse drug events(ADEs) each year which are injuries resulting from drug use. Approximately 28% of ADEs are associated with a medication error and therefore are judged to be preventable.[2] Fifty percent of these ADEs could have been prevented by a pharmacist.[3] It appears that pharmacists and clinical pharmacy services can substantially improve patient safety and reduce hospital costs associated with medication errors.[1] Meanwhile, the report by Institute of Medicine (IOM) indicated for a safety culture in which adverse events can be reported without people being blamed, and that when mistakes occur that lessons are learned.[4] Therefore, if hospital pharmacies want to improve patient safety, it is important to know more about the views of their staff in relation to the culture of patient safety.

Today, reducing medication errors and improving patient safety have become common topics of health services around the world.[5] Many developed countries have initiated the research into the role played by patient safety culture research. On a global basis, several international organizations promote the establishment of a culture of patient safety: the WHO Patient Safety Programme will launch in 2014 the Third Global Patient Safety Challenge, focusing on medication safety, the National Patient Safety Agency in the UK, the Agency for Healthcare Research and Quality in US, The Australia Commission of Safety and Quality, and The European Foundation for the Advancement of Healthcare Practitioners.[4,6] There are some developing countries that are oblivious to the problems created by medication errors. However, efforts are now being taken in these countries, especially India, China and Philippines, to set up pharmacovigilance system for collection of information on

1  
2  
3  
4  
5  
6  
7  
8  
9  
10  
11  
12  
13  
14  
15  
16  
17  
18  
19  
20  
21  
22  
23  
24  
25  
26  
27  
28  
29  
30  
31  
32  
33  
34  
35  
36  
37  
38  
39  
40  
41  
42  
43  
44  
45  
46  
47  
48  
49  
50  
51  
52  
53  
54  
55  
56  
57  
58  
59  
60

ADEs.[6-8]

As pharmacies continually strive to improve safety and quality, there is a growing recognition of the importance of establishing a culture of patient safety. Achieving such a culture requires an understanding of the values, and beliefs about what is important in the organization and what attitudes and behaviors related to patient safety are expected.[9] The assessment of safety culture in pharmacies has recently begun to develop and the consistency of methods and instruments used across pharmacies needs to be further elaborated.[10] Quite often, hospital pharmacies have been included in overall hospital based safety culture assessments.[11-16] There are a few studies of pharmacy survey on patient safety culture by using different scales.[10,17-19] However, most of these studies focused on the evaluation of the psychometric properties of the scales or on developing, and examining the component structure and internal consistency of the survey instruments.[10,18,19] E.g. the study by Ashcroft aims to develop a Pharmacy Safety Climate Questionnaire (PSCQ) and examine the component structure and internal consistency in the community pharmacy setting in England.[19] Nevertheless, no study to date, to our knowledge, using survey developed for pharmacists has been published in which the safety culture in hospital pharmacies has been assessed.

In this study, the patient safety culture in China's hospital pharmacies were measured by using the modified version of Pharmacy Survey on Patient Safety Culture (PSOPSC) developed by AHRQ (version 2012).[9] We also compared some of the findings with existing data from the AHRQ pilot study. Meanwhile, we intended to assess the quality of this investigative questionnaire.

## Methods

### Questionnaire

1 The Pharmacy Survey on Patient Safety Culture (PSOPSC) was translated and modified to suit the  
2 Chinese system. The original PSOPSC was developed by AHRQ in 2012 on the purpose of pilot  
3 study which was designed to assess 11 dimensions of pharmacy with 36 items of patient safety  
4 culture.[9] The questionnaire also included three questions that ask respondents to rate the frequency  
5 with which mistakes were documented and one question that provides an overall rating on patient  
6 safety.[20] Additionally, the original PSOPSC contained a section of “*Background Questions*” as  
7 well as an open ended section. We made a slight emendation of PSOPSC questionnaire by combining  
8 two items—( A3:“*Technicians in this pharmacy receive the training they need to do their jobs*” and  
9 A10: “ *Staff get enough training from this pharmacy*”) into one item because they were almost the  
10 same meaning in Chinese translation. Furthermore, we added two items to the section “*Background*  
11 *Questions*”—(gender and hospital levels) and refreshed the qualification categories to adapt to  
12 Chinese context. (see online supplementary table)

13  
14  
15  
16  
17  
18  
19  
20  
21  
22  
23  
24  
25  
26  
27  
28  
29  
30  
31  
32  
33  
34  
35  
36  
37  
38  
39  
40  
41  
42  
43  
44  
45  
46  
47  
48  
49  
50  
51  
52  
53  
54  
55  
56  
57  
58  
59  
60  
The survey used either 5-point agreement scales (“Strongly disagree” to “Strongly agree”) or  
frequency scales (“Never” to “Always”). Items include a “Does not apply or Don’t know” option.[20]

The permission to use and translate PSOPSC was obtained from AHRQ. We did not use  
“translation-back translation techniques”,because we were informed by our language experts that  
“translation-back translation techniques” was a good approach for some languages especially for  
Latin language system, however it may not be one of the best approaches for the Chinese translation  
which was totally different language system. The Chinese translation was carried out in several steps.  
First, the recommended guideline of PSOPSC: *User’s Guide* was carefully discussed within the  
research group before translation. The first translation was done by a graduate medical student with  
background in patient safety. Then, the translation was double checked and reviewed by the research

1  
2  
3  
4  
5  
6  
7  
8  
9  
10  
11  
12  
13  
14  
15  
16  
17  
18  
19  
20  
21  
22  
23  
24  
25  
26  
27  
28  
29  
30  
31  
32  
33  
34  
35  
36  
37  
38  
39  
40  
41  
42  
43  
44  
45  
46  
47  
48  
49  
50  
51  
52  
53  
54  
55  
56  
57  
58  
59  
60

group including experts in pharmacy, methodologists, and English. Finally, we pre-test the translation in the pilot investigation among 30 pharmacy staff for further improvement before formal investigation. We had a further discussion regarding to some wordings and especially on some items that would cause misunderstanding in Chinese language. (e.g.the items of “*We feel rushed when processing prescriptions*”, “*Staff feel like their mistakes are held against them*”, “*Staff feel comfortable asking questions when they are unsure about something*” and the last section of “*Documenting Mistakes*”).

### Sample

Convenient sampling was used to survey hospital pharmacies (one of the hospital departments ) throughout southwest part of China. The self-administered questionnaire was conducted over six months from March through August 2013 with 20 hospital pharmacies included(pharmacy workers ranging from 30 to 60 in each hospital).We involved in all pharmacy staff working in the pharmacy area where prescriptions were dropped off, filled, dispensed, and picked up or prepared for delivery.[9] The pharmacy staff consisted of senior pharmacists (at least three years university education and working time must more than 9 years in the pharmacy), junior pharmacists (at least three years university education and working time is less than 9 years in the pharmacy) and pharmacy intern who was still undergraduate and just work in a pharmacy in spare time.

To ensure the privacy of the respondents, the survey was strictly anonymous. Permission to conduct the investigation was granted by the hospital pharmacy directors before investigation. The participants were informed of the purpose of the survey and voluntarily completed a paper copy of the questionnaire by the research coordinators in different hospitals.



## Data screening and collection

After receiving the completed questionnaires, a preprocessing step was applied to remove incomplete or invalid data and based on the study by Hellings J.[14] We checked and examined the returned questionnaire. The exclusion criteria were similar to two studies: 1) there was no entire section completed; 2) there was fewer than half items answered or all the items answered the same.[4,14] All data was entered by two researchers (Jia PL and Zhang LH) independently, and then were cross-checked mutually by Epidata (version, 3.02). In case of doubts or disagreement in some answers, we looked into the original questionnaires. Negatively worded items were reversed to ensure that positive answers indicated a higher score. Most of the items in the questionnaire used the Likert 5- point response scale of agreement (Strongly disagree to Strongly agree) or frequency (Never to Always), so the lowest three scoring(1-3) answers (Strongly disagree/Disagree/Neither Agree nor Disagree or Never/Rarely/Sometimes), the highest two scoring (4-5) answers(Agree /Strongly agree or Most of the time/Always), as well as the highest two scoring answers were perceived as positive response answers, and the lowest three scoring answers were deemed other response answer. We calculated the positive response rate according to the formula by the User's Guide of PSOPSC.[9] Items marked as "Does Not Apply/Don't Know" response option by the respondents were excluded when displaying percentages of response and the positive response scores.[9]

## Data analysis

We analyzed the demographic characteristics using the Excel 2007. The number of positive response/positive response rate of all the items was also summarized. Positive response rate was used to evaluate the attitudes towards patient safety culture on different dimensions or items. We aggregated the results across all 20 pharmacies by looking at agreement indices .We used Chi-Square

1  
2 test to compare whether there was a statistical difference on pharmacy staff in hospital and  
3 qualification levels towards patient safety culture. A Chi-squared test was also used to infer if there  
4 was a statistical difference on “*patient safety grade*” in Chinese pharmacies compared with that of  
5 US pharmacies, with the significant level of  $P = 0.05$ .  
6  
7

8  
9 We calculated Cronbach’s  $\alpha$  and exploration factor analysis to evaluate the quality of the  
10 questionnaire. Internal consistency value (Cronbach’s  $\alpha \geq 0.70$ ) for newly developed scales was  
11 recommended.[4] Structure validity was explored using principal component factor analysis by  
12 Kaiser-Meyer-Olkin Measure of Sampling Adequacy ( $KMO > 0.7$ ) and by Bartlett’s Test of Sphericity  
13  $P < 0.05$ .  
14  
15  
16  
17  
18  
19

20 Intercorrelations among 11 dimensions were calculated using the non-parametric Spearman test  
21 as it is adapted to qualitative ordinal variables. The correlations should be less than 0.8 for the  
22 composites to be considered unique and avoid problems with multicollinearity.[12]  
23  
24  
25

26 A test–retest was administered in a specialized hospital to assess the reproducibility. Thirty-three  
27 randomly selected pharmacy staff were asked to answer the questionnaire twice with a 2-week  
28 interval between the test and the retest. Test–retest reliability was assessed by the one-way  
29 intra-class correlation coefficient (ICC type (1, 1)).[21] Reliability was considered good if ICC was  
30 greater than 0.70.[21]  
31  
32  
33  
34  
35  
36  
37  
38

## 39 Ethic

40 This was a non-interventional survey. We were informed that no required from the ethics committee  
41 needed this time by the hospital ethics committee. However, responding to the questionnaire was  
42 voluntary and all answers were de-identified to maintain confidentiality.  
43  
44  
45  
46  
47

## Results

### Sample and response statistics

A total of 630 questionnaires were distributed of which 527 were responded validly (84%). Three hundred and seventy nine (72%) of the respondents were female, 421 (80%) were junior pharmacists, followed by pharmacy interns (16%) and senior pharmacists (4%). The majority of the respondents (68%) was from Third-grade hospitals (Table 1).

**Table 1 Demographic characteristics of respondents**

| Characteristics                   | Senior pharmacist<br>(n = 20) | Junior pharmacist<br>(n = 421) | Pharmacy intern<br>(n = 86) | Total<br>(n = 527)     |
|-----------------------------------|-------------------------------|--------------------------------|-----------------------------|------------------------|
| <b>Sex</b>                        |                               |                                |                             |                        |
| Male                              | 4(2.7)                        | 115(77.7)                      | 29(19.6)                    | 148(100 <sup>a</sup> ) |
| Female                            | 16(4.2)                       | 306(80.8)                      | 57(15.0)                    | 379(100)               |
| <b>Working time in hospital</b>   |                               |                                |                             |                        |
| Less than 6 months                | 3(5.6)                        | 40(74.1)                       | 11(20.4)                    | 54(100)                |
| 6 months to less than 1 year      | 5(6.4)                        | 57(73.1)                       | 16(20.5)                    | 78(100)                |
| 1 to 3 years                      | 5(4.0)                        | 104(83.9)                      | 15(12.1)                    | 124(100)               |
| 3 to 6 years                      | 3(3.0)                        | 82(81.2)                       | 16(15.8)                    | 101(100)               |
| 6 to 12 years                     | 1(1.4)                        | 55(77.5)                       | 15(21.5)                    | 71(100)                |
| 12 years or more                  | 3(3.0)                        | 83(83.8)                       | 13(13.1)                    | 99(100)                |
| <b>Working hours per week</b>     |                               |                                |                             |                        |
| 1 to 16 hours                     | 0(0)                          | 14(87.5)                       | 2(12.5)                     | 16(100)                |
| 17 to 31 hours                    | 1(4.5)                        | 18(81.8)                       | 3(13.6)                     | 22(100)                |
| 32 to 40 hours                    | 14(4.7)                       | 244(73.2)                      | 42(14.0)                    | 300(100)               |
| More than 40 hours                | 5(2.6)                        | 145 (76.8)                     | 39(20.6)                    | 189(100)               |
| <b>Hospital level<sup>b</sup></b> |                               |                                |                             |                        |
| Third-grade hospital              | 14(3.9)                       | 290(81.2)                      | 53(14.8)                    | 357(100)               |
| Second-grade hospital             | 6(3.5)                        | 131(77.1)                      | 33(19.4)                    | 170(100)               |

<sup>a</sup> Parenthesis represent percentage

<sup>b</sup> Third-grade hospital: provincial and municipal hospital  
Second-grade hospital: regional hospital

1 In our study, the percentage of positive responses for the 11 patient safety culture dimensions ranged  
2 from 50% to 88%, the mean positive response rate was 71%. The lowest positive response rate of  
3 dimension was “*Staffing, Work Pressure, and Pace*” (50%), while the highest positive response rate  
4 of dimension was “*Staff Training and Skills*” (88%). There were two dimensions of which positive  
5 response rate were less than 60% such as “*Patient Counseling*”(57%), and “*Staffing, Work Pressure,  
6 and Pace*” (50%). The positive response rate for the rest of the items ranged from 37% to 90%. The  
7 highest positive response rate of the three items reached 90% , while the lowest positive response rate  
8 of the item was “*Staff feel like their mistakes are held against them*”(37%)(Table 2).  
9

10 However, the 2012 Preliminary Comparative Results: PSOPSC in US showed that the average  
11 positive response rate of 11 dimensions ranged from 41% to 90%, the overall average positive  
12 response rate for dimensions was 78%. The lowest positive response rate of item was “*We feel rushed  
13 when processing prescriptions*”(14%) and the highest positive response rate item was “*Our  
14 pharmacists tell patients important information about their new prescriptions*” (93%). There were 4  
15 items of which the positive response rate were less than 60% (Table 2).  
16

17 There were some differences (in the original version of U.S. PSOPSC, the A3: “*Technicians in  
18 this pharmacy receive the training they need to do their jobs*” and A10: “*Staff get enough training  
19 from this pharmacy*” are separate items, in our modified Chinese version, we combined the two items  
20 into a single item because they were almost the same meaning in Chinese translation.) between the  
21 adapted Chinese PSOPSC with that of original US PSOPSC, so only the same items were compared  
22 to explore the differences of perceptions towards patient safety culture between the two countries.  
23 The results showed that there was a significant difference on three items ( $P < 0.05$ ) of which the  
24 positive response rate on three items in China was higher than that of the US. These dimensions were  
25 (1) *Teamwork*, (2) *Staffing, Work Pressure, and Pace*. However, there was a significant difference on  
26 18 items ( $P < 0.05$ ), which of the positive response rate on 18 items in China was lower than that of  
27 the US (Table 2)  
28  
29  
30  
31  
32  
33  
34  
35  
36  
37  
38  
39  
40  
41  
42  
43  
44  
45  
46  
47  
48  
49  
50  
51  
52

**Table2 Positive response rate of each item , Cronbach's  $\alpha$  for dimensions and reproducibility**

| <b>Dimension/items(internal consistency reliability coefficient)</b>                                                                                            | <b>US</b> | <b>China</b> | <b>ICC</b> |
|-----------------------------------------------------------------------------------------------------------------------------------------------------------------|-----------|--------------|------------|
| <b>1 Physical Space and Environment</b> (Cronbach's $\alpha=0.60$ )                                                                                             | 72%       | 69%          |            |
| A1. This pharmacy is well organized.                                                                                                                            | 84%       | 84%          | 0.86       |
| A5. This pharmacy is free of clutter                                                                                                                            | 67%       | 53%          | 0.80       |
| A7. The physical layout of this pharmacy supports good workflow.                                                                                                | 65%       | 69%          | 0.69       |
| <b>2. Teamwork</b> (Cronbach's $\alpha=0.44$ )                                                                                                                  | 81%       | 84%          |            |
| A2. Staff treat each other with respect.                                                                                                                        | 79%       | 86%          | 0.74       |
| A4. Staff in this pharmacy clearly understand their roles and responsibilities.                                                                                 | 81%       | 90%          | 0.86       |
| A9. Staff work together as an effective team.                                                                                                                   | 82%       | 77%          | 0.80       |
| <b>3. Staff Training and Skills</b> (Cronbach's $\alpha=0.75$ )                                                                                                 | 79%       | 88%          |            |
| A3. Technicians in this pharmacy receive the training they need to do their jobs                                                                                | 81%       | 87%          | 0.78       |
| A6. Staff in this pharmacy have the skills they need to do their jobs well.                                                                                     | 86%       | 90%          | 0.86       |
| A8. Staff who are new to this pharmacy receive adequate orientation                                                                                             | 72%       | 88%          | 0.86       |
| <b>4. Communication Openness</b> (Cronbach's $\alpha=0.57$ )                                                                                                    | 87%       | 64%          |            |
| B1. Staff ideas and suggestions are valued in this pharmacy                                                                                                     | 81%       | 64%          | 0.30       |
| B5. Staff feel comfortable asking questions when they are unsure about something                                                                                | 91%       | 72%          | 0.88       |
| B10. It is easy for staff to speak up to their supervisor/ manager about patient safety concerns                                                                | 88%       | 57%          | 0.52       |
| <b>5. Patient Counseling</b> (Cronbach's $\alpha=0.69$ )                                                                                                        | 90%       | 57%          |            |
| B2. We encourage patients to talk to pharmacists about their medications.                                                                                       | 92%       | 56%          | 0.80       |
| B7. Our pharmacists spend enough time talking to patients about how to use their medications                                                                    | 86%       | 52%          | 0.94       |
| B11. Our pharmacists tell patients important information about their new prescriptions                                                                          | 93%       | 63%          | 0.73       |
| <b>6. Staffing, Work Pressure, and Pace</b> (Cronbach's $\alpha=0.50$ )                                                                                         | 41%       | 50%          |            |
| B3. Staff take adequate breaks during their shifts                                                                                                              | 56%       | 60%          | 0.92       |
| B9. We feel rushed when processing prescriptions. (negatively worded)                                                                                           | 14%       | 40%          | 0.81       |
| B12. We have enough staff to handle the workload.                                                                                                               | 56%       | 62%          | 0.92       |
| B16. Interruptions/distractions in this pharmacy (from phone calls, faxes, customers, etc.) make it difficult for staff to work accurately. (negatively worded) | 40%       | 37%          | 0.72       |
| <b>7. Communication About Prescriptions Across Shifts</b> (Cronbach's $\alpha=0.84$ )                                                                           | 81%       | 79%          |            |
| B4. We have clear expectations about exchanging important prescription information across shifts                                                                | 84%       | 83%          | 0.79       |
| B6. We have standard procedures for communicating prescription information across shifts.                                                                       | 78%       | 77%          | 0.72       |
| B14. The status of problematic prescriptions is well communicated across shifts                                                                                 | 81%       | 77%          | 0.76       |
| <b>8. Communication About Mistakes</b> (Cronbach's $\alpha=0.17$ )                                                                                              | 79%       | 62%          |            |
| B8. Staff in this pharmacy discuss mistakes.                                                                                                                    | 74%       | 50%          | 0.93       |
| B13. When patient safety issues occur in this pharmacy, staff discuss them.                                                                                     | 84%       | 57%          | 0.73       |
| B15. In this pharmacy, we talk about ways to prevent mistakes from happening again.                                                                             | 81%       | 78%          | 0.68       |
| <b>9. Response to Mistakes</b> (Cronbach's $\alpha=0.57$ )                                                                                                      | 79%       | 65%          |            |
| C1. Staff are treated fairly when they make mistakes                                                                                                            | 80%       | 81%          | 0.71       |
| C4. This pharmacy helps staff learn from their mistakes rather than punishing them                                                                              | 84%       | 66%          | 0.84       |
| C7. We look at staff actions and the way we do things to understand why mistakes happen in this pharmacy.                                                       | 84%       | 76%          | 0.86       |
| C8. Staff feel like their mistakes are held against them. (negatively worded)                                                                                   | 69%       | 37%          | 0.66       |
| <b>10. Organizational Learning—Continuous Improvement</b> (Cronbach's $\alpha=0.48$ )                                                                           | 83%       | 84%          |            |
| C2. When a mistake happens, we try to figure out what problems in the work process led to the mistake.                                                          | 90%       | 90%          | 0.74       |
| C5. When the same mistake keeps happening, we change the way we do things                                                                                       | 82%       | 81%          | 0.71       |
| C10. Mistakes have led to positive changes in this pharmacy                                                                                                     | 79%       | 82%          | 0.76       |
| <b>11. Overall Perceptions of Patient Safety</b> (Cronbach's $\alpha=0.45$ )                                                                                    | 84%       | 80%          |            |
| C3. This pharmacy places more emphasis on sales than on patient safety. (negatively worded)                                                                     | 80%       | 79%          | 0.73       |
| C6. This pharmacy is good at preventing mistakes.                                                                                                               | 85%       | 76%          | 0.94       |
| C9. The way we do things in this pharmacy reflects a strong focus on patient safety.                                                                            | 86%       | 84%          | 0.68       |
| ICC, intra-class correlation coefficient                                                                                                                        |           |              |            |

## Comparative results

The results showed that there was a significant difference on seven dimensions between Third-grade hospital and Second-grade hospital ( $P < 0.05$ ). The positive response rate of five items of Third-grade hospitals was lower than that of Second-grade hospitals: (1) *This pharmacy is free of clutter* (2) *Our pharmacists spend enough time talking to patients about how to use their medications* (3) *Staff take adequate breaks during their shifts* (4) *We feel rushed when processing prescription* (5) *Interruptions/distractions in this pharmacy make it difficult for staff to work accurately* ( $P < 0.05$ ).

The positive response rate of other items of Third-grade hospitals was higher than that of Second-grade hospitals (Table 3).

Incidence of patient safety events was closely related to the qualification levels of pharmacists. Our results showed that there was a significant difference in the positive response rate on two dimensions (“*Staffing, Work Pressure, and Pace*” and “*Communication About Prescriptions Across Shifts*”,  $P < 0.05$ ) for senior pharmacists, junior pharmacists and pharmacy intern. Furthermore, the positive response rate of pharmacists with high qualification (senior pharmacists) was higher than those with low qualification level (junior pharmacists) on the two items: “*Staff take adequate breaks during their shifts*” and “*We have standard procedures for communicating prescription information across shifts*”  $P < 0.05$  (Table 3).

1  
2  
3  
4  
5  
6  
7  
8  
9  
10  
11  
12  
13  
14  
15  
16  
17  
18  
19  
20  
21  
22  
23  
24  
25  
26  
27  
28  
29  
30  
31  
32  
33  
34  
35  
36  
37  
38  
39  
40  
41  
42  
43  
44  
45  
46  
47  
48  
49  
50  
51  
52  
53  
54  
55  
56  
57  
58  
59  
60

Table 3 The comparison of attitudes of different levels of hospitals and qualification of hospital pharmacists on patient safety culture

| Items                                                                                                            | Hospital Levels      |     |                       |     | $\chi^2$ | p     | Qualification Levels |     |                   |     |              |
|------------------------------------------------------------------------------------------------------------------|----------------------|-----|-----------------------|-----|----------|-------|----------------------|-----|-------------------|-----|--------------|
|                                                                                                                  | Third-grade Hospital |     | Second-grade Hospital |     |          |       | Senior Pharmacist    |     | Junior Pharmacist |     | Pharm Intern |
|                                                                                                                  | NPR                  | NOR | NPR                   | NOR |          |       | NPR                  | NOR | NPR               | NOR | NPR          |
| organized.                                                                                                       | 316                  | 41  | 123                   | 47  | 21.63    | 0.000 | 18                   | 2   | 355               | 66  | 66           |
| of clutter                                                                                                       | 171                  | 186 | 107                   | 63  | 10.45    | 0.001 | 12                   | 8   | 223               | 198 | 43           |
| this pharmacy supports good workflow.                                                                            | 236                  | 121 | 123                   | 47  | 2.07     | 0.15  | 16                   | 4   | 288               | 133 | 55           |
| with respect.                                                                                                    | 308                  | 49  | 141                   | 29  | 1.01     | 0.31  | 18                   | 2   | 360               | 61  | 71           |
| clearly understand their roles and responsibilities.                                                             | 321                  | 36  | 150                   | 27  | 0.34     | 0.56  | 19                   | 1   | 312               | 49  | 80           |
| an effective team.                                                                                               | 283                  | 74  | 116                   | 54  | 7.63     | 0.006 | 16                   | 4   | 321               | 100 | 62           |
| may receive the training they need to do their jobs                                                              | 308                  | 49  | 139                   | 31  | 1.82     | 0.18  | 14                   | 6   | 353               | 68  | 73           |
| have the skills they need to do their jobs well.                                                                 | 319                  | 38  | 150                   | 27  | 0.15     | 0.70  | 19                   | 1   | 376               | 45  | 74           |
| this pharmacy receive adequate orientation                                                                       | 309                  | 48  | 144                   | 26  | 0.33     | 0.57  | 17                   | 3   | 360               | 61  | 76           |
| are valued in this pharmacy                                                                                      | 220                  | 137 | 101                   | 69  | 0.24     | 0.63  | 16                   | 4   | 253               | 168 | 52           |
| ask the questions when they are unsure about something                                                           | 255                  | 102 | 110                   | 60  | 2.45     | 0.12  | 17                   | 3   | 289               | 132 | 59           |
| report up to their supervisor/ manager about patient safety concerns in this pharmacy.                           | 193                  | 164 | 92                    | 78  | 0.000    | 0.99  | 9                    | 11  | 232               | 189 | 44           |
| to talk to pharmacists about their medications.                                                                  | 192                  | 165 | 87                    | 83  | 0.31     | 0.58  | 14                   | 6   | 217               | 204 | 48           |
| enough time talking to patients about how to use their medications                                               | 274                  | 83  | 137                   | 33  | 0.99     | 0.32  | 13                   | 7   | 231               | 208 | 46           |
| patients important information about their new prescriptions                                                     | 214                  | 143 | 94                    | 76  | 1.03     | 0.31  | 12                   | 8   | 247               | 174 | 49           |
| breaks during their shifts                                                                                       | 187                  | 170 | 121                   | 49  | 16.75    | 0.000 | 18                   | 2   | 245               | 176 | 45           |
| processing prescriptions. (negatively worded)                                                                    | 110                  | 247 | 87                    | 83  | 20.40    | 0.000 | 8                    | 12  | 153               | 268 | 36           |
| to handle the workload.                                                                                          | 212                  | 145 | 202                   | 68  | 0.02     | 0.89  | 15                   | 5   | 251               | 170 | 48           |
| ons in this pharmacy (from phone calls, faxes, customers, etc.) make it difficult for<br>ly. (negatively worded) | 116                  | 241 | 71                    | 99  | 4.32     | 0.04  | 6                    | 14  | 147               | 274 | 34           |
| tion about exchanging important prescription information across shifts                                           | 171                  | 186 | 101                   | 69  | 6.11     | 0.01  | 17                   | 3   | 333               | 88  | 61           |
| edges for communicating prescription information across shifts.                                                  | 241                  | 116 | 126                   | 44  | 2.28     | 0.12  | 16                   | 4   | 303               | 118 | 48           |
| ation prescriptions is well communicated across shifts                                                           | 257                  | 100 | 126                   | 44  | 0.26     | 0.61  | 18                   | 2   | 307               | 114 | 58           |
| discrepancies mistakes.                                                                                          | 180                  | 177 | 72                    | 98  | 3.00     | 0.08  | 11                   | 9   | 201               | 220 | 40           |
| issues occur in this pharmacy, staff discuss them.                                                               | 208                  | 149 | 84                    | 86  | 3.65     | 0.06  | 11                   | 9   | 233               | 188 | 48           |
| talk about ways to prevent mistakes from happening again.                                                        | 283                  | 74  | 116                   | 54  | 7.63     | 0.006 | 16                   | 4   | 319               | 102 | 64           |
| when they make mistakes                                                                                          | 287                  | 70  | 131                   | 39  | 0.78     | 0.38  | 17                   | 3   | 330               | 91  | 71           |
| staff learn from their mistakes rather than punishing them                                                       | 222                  | 135 | 120                   | 50  | 3.57     | 0.06  | 15                   | 5   | 275               | 146 | 52           |
| is and the way we do things to understand why mistakes happen in this pharmacy.                                  | 268                  | 89  | 117                   | 53  | 2.28     | 0.13  | 15                   | 5   | 313               | 108 | 57           |
| mistakes are held against them. (negatively worded)                                                              | 118                  | 239 | 68                    | 102 | 2.43     | 0.12  | 5                    | 15  | 152               | 269 | 29           |
| ons, we try to figure out what problems in the work process led to the mistake.                                  | 323                  | 34  | 145                   | 25  | 3.11     | 0.08  | 19                   | 1   | 371               | 50  | 78           |
| we know what is happening, we change the way we do things                                                        | 291                  | 66  | 127                   | 43  | 3.25     | 0.07  | 18                   | 2   | 335               | 86  | 65           |
| positive changes in this pharmacy                                                                                | 298                  | 59  | 118                   | 52  | 13.70    | 0.000 | 16                   | 4   | 337               | 84  | 63           |
| more emphasis on sales than on patient safety. (negatively worded)                                               | 274                  | 83  | 132                   | 38  | 0.05     | 0.82  | 17                   | 3   | 323               | 98  | 66           |
| at preventing mistakes.                                                                                          | 276                  | 81  | 116                   | 54  | 4.98     | 0.03  | 17                   | 3   | 315               | 106 | 60           |
| in this pharmacy reflects a strong focus on patient safety.                                                      | 306                  | 51  | 129                   | 41  | 7.73     | 0.005 | 19                   | 1   | 351               | 70  | 65           |
| es the patient and could cause harm but does not, how often is it documented?                                    | 200                  | 157 | 99                    | 71  | 0.23     | 0.63  | 12                   | 8   | 243               | 178 | 44           |
| es the patient but has no potential to harm the patient, how often is it documented?                             | 207                  | 150 | 95                    | 75  | 0.21     | 0.65  | 13                   | 7   | 246               | 175 | 43           |
| ould have harmed the patient is corrected before he medication, leaves pharmacy,<br>ented?                       | 209                  | 148 | 95                    | 75  | 0.33     | 0.56  | 14                   | 6   | 244               | 177 | 41           |

of positive response answers; NOR, Number of other response

15

## Patient safety grade in China and the US and different qualification levels

The percentage of staff who rated the level of patient safety as “good”, “very good” or “Excellent” was 79% in our study, which was lower than the US score of 95%, there was a significant difference between the two groups ( $P < 0.001$ ). While there was no significant difference on “Patient safety grade” in different qualification levels ( $P = 0.66$ ) (Table 4). Meanwhile, there was a positive correlation between 11 dimensions on the PSOPSC and overall patient safety grade. All correlations were significant at  $P < 0.001$ . The correlation coefficient ranged from 0.30 to 0.46. In addition, there was also a positive correlation between scale and “overall patient safety grade”. The correlation coefficient was 0.43 and the correlation was significant at  $P < 0.001$ .

Table 4 The comparisons of patient safety grade between different position of hospital pharmacists

| Patient safety grade | Senior Pharmacist (%) | Junior Pharmacist (%) | Pharmacy Intern (%) | China (%) | US (%)  |
|----------------------|-----------------------|-----------------------|---------------------|-----------|---------|
| Excellent            | 2 <sup>a</sup> (6.5)  | 25(80.6)              | 4(12.9)             | 84(16)    | 191(40) |
| Very good            | 1(1.2)                | 69(85.2)              | 11(13.6)            | 227(43)   | 211(44) |
| Good                 | 6(5.6)                | 80(74.8)              | 21(19.6)            | 105(20)   | 53(11)  |
| Fair                 | 7(3.1)                | 184(81.4)             | 35(15.5)            | 79(15)    | 24(5)   |
| Poor                 | 4(4.9)                | 63(76.8)              | 15(18.30)           | 32(6)     | 0       |

<sup>a</sup> number of the respondents



## Reliability and validity

In our research, the Cronbach's alpha was of 0.89 for the questionnaire and ranged from 0.17 to 0.83 for dimensions. The dimension "*Communication About Mistakes*" had the lowest coefficients of 0.17 (Table 2). Yet in the US, the Cronbach's  $\alpha$  was ranged from 0.68 to 0.89 for dimensions of which "*Staffing, Work Pressure, and Pace*" had the lowest values of 0.68.

Bartlett's test of the 35 items on patient safety culture demonstrated a sufficient inter-item correlation:  $\chi^2 = 12037.98$ ,  $df = 595$ ,  $P < 0.01$ . Furthermore, the Kaiser–Meyer–Olkin measure of sampling adequacy was satisfactory, with a value of 0.935. Explorative factor analysis was performed using principal component analysis with varimax rotation drawing seven factors. The factors cumulatively explained 59 % of the variance in the survey and the result was acceptable.

Thirty-three participants answered twice to the questionnaire. For the 35 items, an ICC ranged from 0.30 to 0.94. Twenty-nine items had an ICC above 0.70, five items had an ICC between 0.50 and 0.70 and one item had an ICC under 0.50 (Table 2).

The inter-correlations of the 11 dimensions, and correlations between the scale scores were also calculated. No dimension had high correlations above 0.80, with other dimensions. "*Communication Openness*" and "*Patient Counseling*" ( $r = 0.74$ ) was most correlated, while "*Staffing, Work Pressure, and Pace*" and "*Overall Perceptions of Patient Safety*" ( $r = 0.01$ ) was least correlated. The highest intercorrelations was 0.78 between "*Communication Openness*" and the scale ( $r = 0.78$ ). The correlation between each dimension and the total scale were significantly different (Table 5).

Table 5 Correlation with the total scale and inter-correlations of the 11 dimensions

| Dimensions                                             | 1    | 2    | 3    | 4    | 5    | 6    | 7    | 8    | 9    | 10    | 11   | Total |
|--------------------------------------------------------|------|------|------|------|------|------|------|------|------|-------|------|-------|
| 1. Physical Space and Environment                      | 1.00 | 0.15 | 0.12 | 0.27 | 0.25 | 0.22 | 0.26 | 0.22 | 0.73 | 0.61  | 0.15 | 0.14* |
| 2. Teamwork                                            |      | 1.00 | 0.12 | 0.44 | 0.30 | 0.28 | 0.31 | 0.28 | 0.64 | 0.55  | 0.15 | 0.14* |
| 3. Staff Training and Skills                           |      |      | 1.00 | 0.39 | 0.34 | 0.33 | 0.44 | 0.33 | 0.56 | 0.44  | 0.09 | 0.16* |
| 4. Communication Openness                              |      |      |      | 1.00 | 0.74 | 0.63 | 0.37 | 0.57 | 0.37 | 0.36  | 0.03 | 0.78* |
| 5. Patient Counseling                                  |      |      |      |      | 1.00 | 0.70 | 0.70 | 0.70 | 0.20 | 0.02  | 0.05 | 0.76* |
| 6. Staffing, Work Pressure, and Pace                   |      |      |      |      |      | 1.00 | 0.68 | 0.69 | 0.02 | -0.05 | 0.01 | 0.77* |
| 7. Communication About Prescriptions<br>Across Shifts  |      |      |      |      |      |      | 1.00 | 0.68 | 0.20 | 0.05  | 0.07 | 0.75* |
| 8. Communication About Mistakes                        |      |      |      |      |      |      |      | 1.00 | 0.20 | -0.05 | 0.10 | 0.77* |
| 9. Response to Mistakes                                |      |      |      |      |      |      |      |      | 1.00 | 0.32  | 0.04 | 0.17* |
| 10. Organizational Learning—<br>Continuous Improvement |      |      |      |      |      |      |      |      |      | 1.00  | 0.12 | 0.18* |
| 11. Overall Perceptions of Patient Safety              |      |      |      |      |      |      |      |      |      |       | 1.00 | 0.13* |

\*All correlations are significant at  $P < 0.001$

1 Finally, table 6 presented the factor loadings for each item (all loadings > 0.30). Factor one loadings  
2 on five dimensions, and factor two loading on three dimensions (*“Physical*  
3 *Space and Environment”*, *“Teamwork”* and *“Staff Training and Skills”*), and factor three on *“Overall*  
4 *Perceptions of Patient Safety”*.  
5  
6  
7  
8  
9

Table 6 Factors loading in each item

| Items                                                                                                                                                          | 1    | 2    | 3     | 4    | 5     | 6    | 7     |
|----------------------------------------------------------------------------------------------------------------------------------------------------------------|------|------|-------|------|-------|------|-------|
| 1. This pharmacy is well organized.                                                                                                                            |      | 0.78 |       |      |       |      |       |
| 5. This pharmacy is free of clutter                                                                                                                            |      | 0.55 |       |      |       |      |       |
| 7. The physical layout of this pharmacy supports good workflow.                                                                                                |      | 0.72 |       |      |       |      |       |
| 12. Staff treat each other with respect.                                                                                                                       |      | 0.82 |       |      |       |      |       |
| 14. Staff in this pharmacy clearly understand their roles and responsibilities.                                                                                |      | 0.47 |       |      |       |      | 0.30  |
| 19. Staff work together as an effective team.                                                                                                                  |      | 0.80 |       |      |       |      |       |
| 10. Technicians in this pharmacy receive the training they need to do their jobs                                                                               |      | 0.41 |       |      |       |      |       |
| 14. Staff in this pharmacy have the skills they need to do their jobs well.                                                                                    |      | 0.41 |       |      |       |      |       |
| 12. Staff who are new to this pharmacy receive adequate orientation                                                                                            |      | 0.66 |       |      |       |      |       |
| 13. Staff ideas and suggestions are valued in this pharmacy                                                                                                    | 0.73 |      |       |      |       |      |       |
| 14. Staff feel comfortable asking questions when they are unsure about something                                                                               | 0.97 |      |       |      |       |      |       |
| 15. It is easy for staff to speak up to their supervisor/ manager about patient safety concerns in this pharmacy.                                              | 0.95 |      |       |      |       |      |       |
| 16. We encourage patients to talk to pharmacists about their medications.                                                                                      | 0.96 |      |       |      |       |      |       |
| 17. Our pharmacists spend enough time talking to patients about how to use their medications                                                                   | 0.96 |      |       |      |       |      |       |
| 18. Our pharmacists tell patients important information about their new prescriptions                                                                          | 0.61 |      |       |      |       |      |       |
| 19. Staff take adequate breaks during their shifts                                                                                                             | 0.73 |      |       |      |       |      |       |
| 20. We feel rushed when processing prescriptions. (negatively worded)                                                                                          | 0.92 |      |       |      |       |      |       |
| 21. We have enough staff to handle the workload.                                                                                                               | 0.61 |      |       |      |       |      |       |
| 22. Interruptions/distractions in this pharmacy (from phone calls, faxes, customers, etc.) make it difficult for staff to work accurately. (negatively worded) | 0.94 |      |       |      |       |      |       |
| 23. We have clear expectations about exchanging important prescription information across shifts                                                               | 0.73 |      |       |      |       |      |       |
| 24. We have standard procedures for communicating prescription information across shifts.                                                                      | 0.72 |      |       |      |       |      |       |
| 25. The status of problematic prescriptions is well communicated across shifts                                                                                 | 0.96 |      |       |      |       |      |       |
| 26. Staff in this pharmacy discuss mistakes.                                                                                                                   | 0.74 |      |       |      |       |      |       |
| 27. When patient safety issues occur in this pharmacy, staff discuss them.                                                                                     | 0.60 |      |       |      |       |      |       |
| 28. In this pharmacy, we talk about ways to prevent mistakes from happening again.                                                                             | 0.53 |      |       |      |       |      |       |
| 29. Staff are treated fairly when they make mistakes                                                                                                           |      |      |       | 0.92 |       |      |       |
| 30. This pharmacy helps staff learn from their mistakes rather than punishing them                                                                             |      | 0.65 |       |      |       |      |       |
| 31. We look at staff actions and the way we do things to understand why mistakes happen in this pharmacy.                                                      |      | 0.68 |       |      |       |      |       |
| 32. Staff feel like their mistakes are held against them. (negatively worded)                                                                                  |      | 0.41 |       |      | 0.54  |      |       |
| 33. When a mistake happens, we try to figure out what problems in the work process led to the mistake.                                                         |      |      |       |      | -0.75 |      |       |
| 34. When the same mistake keeps happening, we change the way we do things                                                                                      |      | 0.69 |       |      |       |      |       |
| 35. Mistakes have led to positive changes in this pharmacy                                                                                                     |      |      |       | 0.91 |       |      |       |
| 36. This pharmacy places more emphasis on sales than on patient safety. (negatively worded)                                                                    |      |      | -0.71 |      |       |      |       |
| 37. This pharmacy is good at preventing mistakes.                                                                                                              | 0.39 | 0.71 |       |      |       |      |       |
| 38. The way we do things in this pharmacy reflects a strong focus on patient safety.                                                                           |      | 0.43 |       |      |       | 0.33 | -0.35 |

## Discussion

The study is the first publication of its kind using the PSOPSC to explore patient culture in hospital pharmacy sector. It is, furthermore, the first Chinese study to report data on perspectives of patient culture in different levels of qualification and hospital in pharmacy setting. The PSOPSC has been introduced by AHRQ for about one year which was only conducted for pilot study in US pharmacies.[20] We adopted this survey in our research, because we take the consideration that this is a very comprehensive patient safety culture survey focused on the pharmacy sector which is best suitable for examining patient safety climate from a hospital pharmacy perspective. Moreover, the survey will enable the pharmacies to assess areas of strength and identify areas for improvement in their patient safety culture as part of their quality improvement activities.

In our study, the response rate was 84% which was higher than the pilot study implemented in US (75%).[20] A high response rate on a questionnaire about safety attitudes might be a measure of the staff's attentiveness to these issues.[22] Overall, the mean positive response rate for the 11 patient safety culture dimensions of the PSOPSC survey was 71%, slightly higher than the other two studies conducted in Taiwan by Chen 2012[23] and the mainland of China by Nie 2013.[4] Comparing with these two studies, we found that the three studies have a common feature that they predominantly used surveys to assess individual attitudes covering areas related to work environment, adherence to guidelines and safety concerns.[24] The only difference is that Chen and Nie used the Hospital Survey on Patient Safety Culture (HSPSC) for all health care workers within organizational level, while we

1  
2 used PSOPSC for hospital pharmacy workers which thereby, elicits a snapshot of the safety climate in  
3  
4 the specific setting. Meanwhile, in some other studies, the pharmacists surveyed were relatively in a  
5  
6 small size in their study populations, such as the HSPSC study in Japan by Shinya Ito, 155(2.4%)  
7  
8 pharmacists were included,[11] and the HSPSC study in US by Joann S Sorra, 1215(2%) pharmacists  
9  
10 were included.[12]  
11  
12

13  
14  
15 Our study found that there was substantial variability in the percent of positive scores across  
16  
17 11 dimensions. The dimension “*Staff Training and Skill*” appeared to receive the highest positive  
18  
19 response rate (88%). An explanation for this might be the fact that the national job training project for  
20  
21 pharmacists in China named ‘*Clinical Pharmacist pilot Training*’ for a long time put great effort into  
22  
23 providing clinical pharmacy training for pharmacists who are working or will work as clinical  
24  
25 pharmacists from different hospitals.[25] But another possible reason is that the relatively high  
26  
27 proportion of positive responses might be that the translation was inadequate, and that a ceiling effect  
28  
29 occurred.[10] Simultaneously, the dimension “*Teamwork*” received a positive response rate of 84% in  
30  
31 our study, which is similar to the studies reported by Belgium,[14] Turkey,[26] Swedish,[10] US,[27],  
32  
33 China[4] and Taiwan[23] ( 70%,76%,78%,80%,84%,and 94% ,respectively). The interpretation of the  
34  
35 results within a given setting is that if  $\geq 80\%$  of the respondents report positive assessments on a  
36  
37 specific item or set of items, then there is a strong positive consensus in that setting.[10] A score of  
38  
39 less than 60% is considered to be in the "needs improvement," range.[10] Hence,  $\geq 60\%$  is a  
40  
41 threshold for which safety climate can be considered acceptable.  
42  
43  
44  
45  
46  
47  
48  
49  
50  
51

1  
2  
3  
4  
5  
6  
7  
8  
9  
10  
11  
12  
13  
14  
15  
16  
17  
18  
19  
20  
21  
22  
23  
24  
25  
26  
27  
28  
29  
30  
31  
32  
33  
34  
35  
36  
37  
38  
39  
40  
41  
42  
43  
44  
45  
46  
47  
48  
49  
50  
51  
52  
53  
54  
55  
56  
57  
58  
59  
60

This study displayed that both in China and US, the dimensions that received the lowest positive rate was “*Staffing, Work Pressure, and Pace*”(50% and 41%, respectively), indicating that the respondents feel that staff allocation is not adequate to handle patient safety related workload.[4] Our results are according with those reported by Hellings and the study conducted in Taiwan and China. [4,14,23,28] Meanwhile, a study by Elisa E in Northern California hospital of US showed that the most common causes of medication errors were high workload (25.3%), fatigue or lack of sleep (16.5%).[29] Therefore it is important for pharmacy to allocate staffs and working hours more adequately to reduce the medication errors and improve patient safety. In addition, in our study, another relatively low positive response rate was the dimension “*Patient Counseling*” (57%) which reflected the problem in China: poor healthcare worker (including pharmacy staff)-patient communication. A study by Zou in China indicated that 49% medical lawsuits related to poor healthcare worker-patient communication.[30] A study by Moore P showed that of 635 complaints involved a doctor, 49 cases (15%) were because of "Lack of communication".[31] Lack of ‘communication openness’ was identified as a major safety culture problem. In other words, communication openness was seriously jeopardised by the lack of trust between health workers and patients in China reported by Liu in the recent study.[32]

The results showed that the positive response numbers of Third-grade hospital regarding patient safety culture was higher than that of Second-grade hospital. The reason account for this may be that in China, the Third-grade hospital always manage severe clinical cases so the pharmacies of

1  
2  
3 Third-grade hospital have a higher potential for life-threatening medical errors. As most risky medical  
4  
5 interventions take place in these hospitals, the staff have to get better training to deal with in  
6  
7 safety-related issues.[26] Simultaneously, our study found that the positive response rate of  
8  
9 pharmacists with high qualification (senior pharmacists) was higher than those with low qualification  
10  
11 level (junior pharmacists ) on the dimension “*Staffing, Work Pressure, and Pace*”. Seniority has been  
12  
13 found to bring about experience,[22] as they know the pitfalls of the pharmacy work and can avoid  
14  
15 them masterly which might reduce the risk for error making, so senior pharmacists might work more  
16  
17 effectively and had a positive attitude to their work pressure. This was also elucidated in the study by  
18  
19 Sorlie V that the more experience physicians gained, the more confident they would feel.[33] So we  
20  
21 can infer that the experiential proficiency is a prerequisite to this higher positive response.  
22  
23  
24  
25  
26  
27  
28

29 The pharmacy is an important link between the patient and medication, so developing a culture  
30  
31 of safety has become one of the pillars of the pharmacy. According to the report of China Food and  
32  
33 Drug Administration(CFDA), a total of 852,799 drug adverse events happened in China in 2011.[7]  
34  
35 Chinese Hospital Association (CHA) estimated that adverse events affect 1.6 ~ 7.6 million  
36  
37 hospitalizations annually in Chinese hospitals.[34] A study by Li,XL showed that 1165 medication  
38  
39 errors reported by 22 hospitals in Beijing in 2012[35]and another study by Li,XY in China indicating  
40  
41 that 32 (26.30%) dispensing errors were applied to the pharmacists and 5 (4.03%) dispensing errors  
42  
43 were related to the environment of the pharmacy.[36] The adaptation of this instrument to the Chinese  
44  
45 pharmacy context not only is an important milestone for safety research in pharmacies but also  
46  
47  
48  
49  
50  
51



1  
2 provides the pharmacies with an instrument that generates diagnostic and actionable information for  
3  
4 pharmacies and leaders to use in guiding improvement efforts.[37] The findings of the study  
5  
6 illustrated that the pharmacies and health care organizations in China should have imperatives to  
7  
8 develop strategies to improve pharmacy service quality and ensure patient safety. These strategies  
9  
10 include: strengthen patient safety training for pharmacy staffs, reasonable allocate staff and workload,  
11  
12 creating an environment conducive to reporting errors by focusing on the process or system failure  
13  
14 instead of the individual who committed the error.[38] What's more, we should raise awareness of the  
15  
16 important of patient engagement in improving medication safety because a global concerted effort is  
17  
18 need to address medication safety and it needs the involvement of all health-care stakeholders,  
19  
20 including patient. In addition, building trust between providers and patients and between managers  
21  
22 and health workers is essential for empowering health workers to address patient safety issues.[32]  
23  
24  
25  
26  
27  
28  
29  
30  
31

32 Finally, although patient safety activity is getting recognized in China, there have still many  
33  
34 challenges and difficulties in implementation this activity. E.g, our initial design was to include 1000  
35  
36 pharmacy staff from 50 hospitals across China. However, the hospitals where we investigated were  
37  
38 very sensitive and they did not like to "open" their 'data' or they were concerned whether this would  
39  
40 influence the reputation of hospitals. Therefore, each time, we needed to negotiate and explain our  
41  
42 purpose to get the approval from relative responsible persons which was a very time consuming  
43  
44 experience and making our survey last for about 6 months and which was also the reason why our  
45  
46 sample size was not big enough. We wish this would be changed with the implementation of patient  
47  
48  
49  
50  
51

1  
2  
3 safety activity in the country.  
4

## 5 **Reliability and validity**

6  
7  
8 Using the explorative factor analysis drew 7 factors. The factors cumulatively explained 59 % of the  
9  
10 variance in the survey and the result was acceptable. Using Cronbach's  $\alpha$ , all subscales had acceptable  
11  
12 levels of reliability, which varied from 0.84 for "*Communication About Prescriptions Across Shifts*"  
13  
14 to 0.44 for "*Teamwork*", with the exception of the dimension "*Communication about Mistakes*" which  
15  
16 had the lowest value 0.17. The results were less satisfactory as compared to AHRQ data.[20] The  
17  
18 dimension "*Communication about Mistakes*" received the lowest Cronbach's  $\alpha$  among the 11  
19  
20 dimensions, three reasons could account for this. Firstly, a possible explanation was the translation,  
21  
22 scale should not be translated and applied in another setting of a different cultural context directly.[4]  
23  
24 Secondly, factor structure of the PSOPSC model for these items might not fit the data well.[23]  
25  
26 Thirdly, the sample size of the data might not be large enough to achieve consistency.[23] But, the low  
27  
28 reliability also suggested the instability of the aspects measured by the questionnaire, which are based  
29  
30 on professionals' perceptions of safety (themselves linked to safety circumstances at a given time, and  
31  
32 inherently instable and subject to change). If culture does not change so rapidly, perceptions do.[21]  
33  
34 Finally, unlike other similar studies published anywhere focused on tool evaluation or developing the  
35  
36 survey tool, the primary objective of our study focused on "to explore the attitudes and perceptions of  
37  
38 patient safety culture for pharmacy workers in China by using a Pharmacy Survey on Patient Safety  
39  
40 Culture ", Hence, we did not conduct a confirmatory factor analysis to test  
41  
42  
43  
44  
45  
46  
47  
48  
49  
50  
51  
52

1  
2 hypotheses about a particular factor structure which might be a weakpoint in this study. However, we  
3  
4  
5 will take this into our consideration with larger sample size in our future study.  
6  
7

## 8 9 **Conclsion**

10  
11 The results demonstrated that among the pharmacy staff surveyed in China there was a positive  
12  
13 attitudes towards patient safety culture in their organizations. The Chinese translation of PSOPSC  
14  
15 questionnaire (version 2012) used in our study was acceptable.  
16  
17

## 18 19 **Footnotes**

## 20 21 **Acknowledgement**

22  
23 Thanks for all the respondents who took part in this study. Thanks Prof.Kang Deying for his statistical  
24  
25 support and Miss Kathren Sieminski for her help with English revising.  
26  
27

## 28 29 **Contributors**

30  
31 MMZ conceptualized and designed the study. PLJ and LHZ performed and interpreted the data  
32  
33 analysis. MMZ and PLJ drafted and revised the manuscript critically for intellectual content. The rest  
34  
35 of authors did data collection and checked data input. All authors read and approved the final  
36  
37 manuscript.  
38  
39  
40  
41  
42

## 43 44 **Competing interests**

45  
46 None  
47

## 48 49 **Funding**

1  
2  
3 This project was supported by National Natural Science foundation NO.70973083  
4

### 5 **Data sharing statement**

6  
7 No additional data are available.  
8  
9

### 10 **Reference**

- 11  
12  
13 1 Bond CA, Raehl CL, Franke T. Clinical pharmacy services, hospital pharmacy staffing, and  
14 medication errors in United States hospitals. *Pharmacotherapy* 2002;22:134-47.  
15  
16  
17  
18 2 Kaushal R, Shojania KG, Bates DW. Effects of computerized physician order entry and clinical  
19 decision support systems on medication safety. *Arch Intern Med* 2003;163:1409-16.  
20  
21  
22  
23  
24 3 Kelly WN. Potential risks and prevention, part 4: Reports of significant adverse drug events. *Am J*  
25  
26 *Health Syst Pharm* 2001;58:1406-12.  
27  
28  
29 4 Nie YL, Mao XY, Cui H, et al. Hospital survey on patient safety culture in China. *BMC Healt Serv*  
30  
31 *Res* 2013;13:228.  
32  
33  
34 5 Benjamin DM. Reducing Medication Errors and Increasing Patient Safety: Case Studies in Clinical  
35  
36 Pharmacology. *J Clin Pharmacol* 2003;43:768-83  
37  
38  
39 6 Patel I, Balkrishnan R. Medication error management around the globe: An overview. *Indian J*  
40  
41 *Pharm Sci* 2010;72:539-45.  
42  
43  
44  
45 7 The national annual report of adverse drug reaction monitoring in 2011.  
46  
47 <http://www.sda.gov.cn/WS01/CL0078/72193.html> (accessed May 2012)  
48  
49  
50 8 Hartigan-Go K. Developing a pharmacovigilance system in the Philippines, a country of diverse  
51  
52  
53  
54  
55  
56  
57  
58  
59  
60

1  
2 culture and strong traditional medicine background. *Toxicology* 2002;181-182:103-7.

3  
4  
5 9 Westat R, Martha F, Joann S. Pharmacy Survey on Patient Safety Culture: User's Guide.( Prepared

6  
7  
8 by Rockville, MD 20850 Contract No. HHS290200710024C). AHRQ Publication No.

9  
10  
11 12(13)-0085: Agency for Healthcare Research and Quality, 2012.

12  
13  
14 <http://www.ahrq.gov/professionals/quality-patient-safety/patientsafetyculture/pharmacy/index.html>

15  
16 10 Norden-Hägg A, Sexton J, Källemark-Sporrong S, et al. Assessing safety culture in pharmacies:

17  
18 The psychometric validation of the Safety Attitudes Questionnaire (SAQ) in a national sample of

19  
20  
21 community pharmacies in Sweden. *BMC Pharmacol Toxicol* 2010;10:8.

22  
23  
24 11 Ito S, Seto K, Kigawa M, et al. Development and applicability of Hospital Survey on Patient

25  
26  
27 Safety Culture (HSOPS) in Japan. *BMC Health Serv Res* 2011;11:28.

28  
29  
30 12 Sorra JS, Dyer N. Multilevel psychometric properties of the AHRQ hospital survey on patient

31  
32  
33 safety culture. *BMC Health Serv Res* 2010;10:199.

34  
35  
36 13 Singer SJ, Gaba DM, Geppert JJ, et al. The culture of safety: results of an organization-wide

37  
38  
39 survey in 15 California hospitals. *Qual Saf Health Care* 2003;2:112-8.

40  
41  
42 14 Hellings J, Schrooten W, Klazinga N, et al. Challenging patient safety culture: survey results. *Int J*

43  
44  
45 *Health Care Qual Assur* 2007;20:620-32.

46  
47  
48 15 Nieva VF, Sorra J. Safety culture assessment: A tool for improving patient safety in healthcare

49  
50  
51 organizations. *Qual Saf Health Care* 2003;12:ii17-ii23.

52  
53  
54 16 Kanse L, Schaaf TW Van Der, Vrijland ND, et al. Error recovery in a hospital pharmacy.

1  
2  
3  
4  
5  
6  
7  
8  
9  
10  
11  
12  
13  
14  
15  
16  
17  
18  
19  
20  
21  
22  
23  
24  
25  
26  
27  
28  
29  
30  
31  
32  
33  
34  
35  
36  
37  
38  
39  
40  
41  
42  
43  
44  
45  
46  
47  
48  
49  
50  
51  
52  
53  
54  
55  
56  
57  
58  
59  
60

*Ergonomics* 2006;49:503-16.

17 Phipps DL, De Bie J, Herborg H, et al. Evaluation of the Pharmacy Safety Climate Questionnaire  
in European community pharmacies. *Int J Qual Health Care* 2012;24:16-22.

18 Ashcroft DM, Morecroft C, Parker D, et al. Safety culture assessment in community pharmacy:  
development, face validity, and feasibility of the Manchester Patient Safety Assessment Framework  
*Qual Saf Health Care* 2005;14:417-21.

19 Ashcroft DM, Parker D. Development of the Pharmacy Safety Climate Questionnaire: a principal  
components analysis. *Quality and Safety in Health Care* 2009;18:28-31.

20 Westat, Rockville. 2012 Preliminary Comparative Results: Pharmacy Survey on Patient Safety  
Culture. (Prepared by Westat, Rockville Contract No. HHSA 290200710037). AHRQ Publication  
No. 12-0085-1-EF: U.S. Department of Health and Human Services, 2012.  
<http://www.ahrq.gov/professionals/quality-patient-safety/patientsafetyculture/pharmacy/index.html>

21 Occelli P, Quenon JL, Kret M et al. Validation of the French version of the Hospital Survey  
on Patient Safety Culture questionnaire. *Int J Qual Health Care* 2013;25:459-68.

22 Norden-Hagg A, Kalvemark-Sporrong S, Lindblad AK. Exploring the relationship between safety  
culture and reported dispensing errors in a large sample of Swedish community pharmacies. *BMC  
Pharmacol Toxicol* 2012;13:4.

23 Chen IC, Li H-H. Measuring patient safety culture in Taiwan using the Hospital Survey on Patient  
Safety Culture (HSOPSC). *BMC Health Serv Res* 2010;10:152.

- 1  
2  
3 24 Colla JB, Bracken AC, Kinney LM, et al. Measuring patient safety climate: a review of surveys.  
4  
5 *Qual Saf Health Care* 2005;14:364-6.  
6  
7  
8 25 Ning-Jiang Bao, Hong Shao, Xiao-Yan Nie, et al. Analysis of the status of clinical pharmacist pilot  
9  
10 training in Chinese hospitals. *Chinese Pharmaceutical Sciences* 2011;20:410-14.  
11  
12  
13 26 Bodur S, Filiz E. A survey on patient safety culture in primary healthcare services in Turkey. *Int J*  
14  
15 *Qual Health Care* 2009;21:348-55.  
16  
17  
18 27 Joann S, Theresa F, Naomid D, et al. 2012 User Comparative Database Report: Hospital Survey on  
19  
20 Patient Safety Culture.( Prepared by Westat, Rockville, MD under Contract No. HHSA  
21  
22 290200710024C). Agency for Healthcare Research and Quality,January 2012  
23  
24  
25  
26 <http://www.ahrq.gov/professionals/quality-patient-safety/patientsafetyculture/hospital/2012/index.html>  
27  
28  
29 28 Zhu J, Li L, Li Y, et al. What constitutes patient safety culture in Chinese hospitals. *Int J Qual*  
30  
31 *Health Care* 2012;24:250-57.  
32  
33  
34 29 Nguyen EE, Connolly PM, Wong V. Medication safety initiative in reducing medication errors. *J*  
35  
36 *Nurs Care Qual* 2010;25:224-30.  
37  
38  
39 30 Zou B,Zhao S. The application analysis of communication skill in reconstructing the harmonious  
40  
41 doctor-patient relationship. *The Journal of Medical Theory and Practice* 2013;26:1676-78.  
42  
43  
44 31 Moore p, Vargas A, Núñez S, et al. A study of hospital complaints and the role of the  
45  
46 doctor-patient communication. *Rev Med Chil* 2011;139:880-5.  
47  
48  
49 32 Liu C, Liu W, Wang Y, et al. Patient safety culture in China: a case study in an outpatient setting  
50  
51  
52  
53  
54  
55  
56  
57  
58  
59  
60

1  
2  
3 in Beijing. *BMJ Qual Saf* 2013;0:1–9.

4  
5 33 Sorlie V, Lindseth A, Uden G, et al. Women physicians' narratives about being in ethically difficult  
6  
7 care situations in paediatrics. *Nurs Ethics* 2000;7:47-62.

8  
9  
10 34 Cao RG. Medical quality and patient safety in China. *Chinese Hospitals* 2007;11:1-4.

11  
12  
13 35 Li XL, Yan SY, Wang YQ, et al. Analysis of 1165 medication errors among 22 hospitals in Beijing.  
14  
15  
16 *Adverse Drug Reactions Journal* 2013;2:64-68.

17  
18  
19 36 Li XY, Lai BL, Li SL, et al. Error analysis of hospital outpatient pharmacy from 2010 to 2011.  
20  
21  
22 *Pharmacy Today* 2012;8:496-97.

23  
24 37 Sexton JB, Paine LA, Manfuso J, et al. A culture check-up for safety in “my patient care area”  
25  
26  
27 *Jt Comm J Qual Patient Saf* 2007;33:699-703.

28  
29 38 Hughes RG, Clancy CM. Working conditions that support patient safety. *J Nurs Care Qual*  
30  
31  
32 2005;20:289-92.



**Title page**

**Manuscript title:** Safety Culture in Pharmacy Setting Using Pharmacy Survey on Patient Safety

Culture: A Cross-sectional Study in China

**Running title:** Patient Safety Culture in Pharmacy Setting

**Names and affiliations of contributing authors:**

PL Jia<sup>1#</sup>, LH Zhang<sup>1#</sup>, MM Zhang<sup>1§</sup>, LL Zhang<sup>2</sup>, C Zhang<sup>2</sup>, SF Qin<sup>3</sup>, XL Li<sup>4</sup>, KX Liu<sup>5</sup>

# Equal contributors

§Corresponding author

Pengli Jia (PLJ): Research assistant, Chinese Evidence-Based Medicine, West China Hospital,

Sichuan University, Chengdu 610041 P R China. Equal-First authors

Longhao Zhang (LHZ): Research assistant, Chinese Evidence-Based Medicine, West China Hospital,

Sichuan University, Chengdu 610041 P R China. Equal-First authors

Mingming Zhang (MMZ): MSc. Professor and WHO patient for patient safety champion, Chinese

Evidence-Based Medicine, West China Hospital, Sichuan University, Chengdu 610041 P R China.

Corresponding author

Linli Zhang (LLZ): Professor, Department of Pharmacy, West China Second University Hospital,

Chengdu 610041 P R China.

Chuan Zhang (CZ): Senior Pharmacist, Department of Pharmacy, West China Second University

Hospital, Chengdu 610041 P R China.

Shengfang Qin (SFQ): Associated Professor, Department of Fetal Medicine, Sichuan Provincial

Hospital for Women and Children, Chengdu 610045 P R China

Xinli Li (XLL): Associated Professor, Department of Pharmacy, The Sixth Chengdu Hospital, 610051

P R China

1 Kexin Liu (KXL):Pharmacist, Department of Pharmacy, West China Hospital, Sichuan University,  
2  
3 Chengdu 610041 P R China.  
4

5  
6 **Correspondence details for corresponding author:**  
7

8 Prof. Mingming Zhang, Chinese Evidence-Based Medicine Centre, West China Hospital  
9  
10 Sichuan University, Chengdu 610041. P.R. China.  
11

12  
13 Tel: 86-28-85422079  
14

15 Fax: 86-28-85422253  
16

17  
18 E-mail: mingming-zhang@163.com  
19

20 **Key words:** Patient safety; Safety culture; Pharmacists; Surveys  
21

22 **Word count:** 4360~~4161~~  
23  
24  
25  
26  
27  
28  
29  
30  
31  
32  
33  
34  
35  
36  
37  
38  
39  
40  
41  
42  
43  
44  
45  
46  
47  
48  
49  
50  
51  
52  
53  
54  
55  
56  
57  
58  
59  
60

## Abstract

**Objective** To explore the attitudes and perceptions of patient safety culture for pharmacy workers in China by using a Pharmacy Survey on Patient Safety Culture (PSOPSC), and to assess the psychometric properties of the translated Chinese-language version of the PSOPSC.

**Design** Cross-sectional study.

**Participants** Data were obtained from 20 hospital pharmacies in southwest part of China.

**Method** Chi-Square test was performed to explore the differences on pharmacy staff in different hospital and qualification levels and countries towards patient safety culture. We also computed descriptive statistics, internal consistency coefficients and inter-subscale correlation analysis, then conducted a exploratory factor analysis. A test-retest was performed to assess reproducibility of the items.

**Result** A total of 630 questionnaires were distributed of which 527 were responded validly (response rate 84 %). The positive response rate for each item ranged from 37% to 90%. The positive response rate on three dimensions (“*Teamwork*”, “*Staff Training and Skills*” and “*Staffing, Work Pressure, and Pace*”) was higher than that of Agency for Healthcare Research and Quality(AHRQ) data ( $P<0.05$ ). There was a statistical difference on the perception of patient safety culture in different hospital and qualification levels. The internal consistency of the total survey was comparatively satisfied (Cronbach’s  $\alpha=0.89$ ).

**Conclusion** The results demonstrated that among the pharmacy staffs surveyed in China, there was a positive attitudes towards patient safety culture in their organizations. Identifying perspectives of patient safety culture from pharmacists in different hospital and qualification levels are important, since this can help support decisions about action to improve safety culture at pharmacy settings. The Chinese translation of PSOPSC questionnaire (version 2012) applied in our study is

1  
2  
3  
4  
5  
6  
7  
8  
9  
10  
11  
12  
13  
14  
15  
16  
17  
18  
19  
20  
21  
22  
23  
24  
25  
26  
27  
28  
29  
30  
31  
32  
33  
34  
35  
36  
37  
38  
39  
40  
41  
42  
43  
44  
45  
46  
47  
48  
49  
50  
51  
52  
53  
54  
55  
56  
57  
58  
59  
60

acceptable.

## Strengths and limitations of this study

- This is the first kind of study that was conducted in China measuring patient safety culture in pharmacy setting. The results of this study may provide some evidence to help healthcare decision makers or policy makers in pharmacy settings from developing countries to develop effective strategies to assess areas of strength and identify areas for improvement in their patient safety culture as part of their quality improvement activities.
- Findings might be limited by selection bias as pharmacies were selected on a convenient basis. Our study was carried out only in the Second-grade and Third-grade hospitals which may not reflect the whole picture of patient safety culture in China. Meanwhile, this is the first kind of study using PSOPSC to measure safety culture in pharmacy setting, there are no similar studies from benchmark scores using PSOPSC for us to compare with, so the external comparison was restrictive. [Finally, because of small sample numbers included in our study, we did not conduct confirmatory factor analysis to test hypotheses about a particular factor structure.](#)

## Background

Medication errors are the largest component of medical errors accounting for about a quarter of the incidents which threaten patient safety.[1] An estimated 770000 people are injured or die in hospitals from adverse drug events(ADEs) each year which are injuries resulting from drug use. Approximately 28% of ADEs are associated with a medication error and therefore are judged to be preventable.[2] Fifty percent of these ADEs could have been prevented by a pharmacist.[3] It appears that pharmacists and clinical pharmacy services can substantially improve patient safety and reduce hospital costs associated with medication errors.[1] Meanwhile, the report by Institute of Medicine (IOM) indicated for a safety culture in which adverse events can be reported without people being blamed, and that when mistakes occur that lessons are learned.[4] Therefore, if hospital pharmacies want to improve patient safety, it is important to know more about the views of their staff in relation to the culture of patient safety.

Today, reducing medication errors and improving patient safety have become common topics of health services around the world.[5] Many developed countries have initiated the research into the role played by patient safety culture research. On a global basis, several international organizations promote the establishment of a culture of patient safety: the WHO Patient Safety Programme will launch in 2014 the Third Global Patient Safety Challenge, focusing on medication safety, the National Patient Safety Agency in the UK, the Agency for Healthcare Research and Quality in US, The Australia Commission of Safety and Quality, and The European Foundation for the Advancement of Healthcare Practitioners.[4,6] There are some developing countries that are oblivious to the problems created by medication errors. However, efforts are now being taken in these countries, especially India, China and Philippines, to set up pharmacovigilance system for collection of information on ADEs.[6-8]

As pharmacies continually strive to improve safety and quality, there is a growing recognition

1 of the importance of establishing a culture of patient safety. Achieving such a culture requires an  
2 understanding of the values, and beliefs about what is important in the organization and what attitudes  
3 and behaviors related to patient safety are expected.[9] The assessment of safety culture in  
4 pharmacies has recently begun to develop and the consistency of methods and instruments used  
5 across pharmacies needs to be further elaborated.[10] Quite often, hospital pharmacies have been  
6 included in overall hospital based safety culture assessments.[11-16] There are a few studies of  
7 pharmacy survey on patient safety culture by using different scales.[10,17-19] However, most of  
8 these studies focused on the evaluation of the psychometric properties of the scales or on developing,  
9 and examining the component structure and internal consistency of the survey instruments.[10,18,19]  
10 E.g. the study by Ashcroft aims to develop a Pharmacy Safety Climate Questionnaire (PSCQ) and  
11 examine the component structure and internal consistency in the community pharmacy setting in  
12 England.[19] Nevertheless, no study to date, to our knowledge, using survey developed for  
13 pharmacists has been published in which the safety culture in hospital pharmacies has been assessed.

14 In this study, ~~we measured~~ the patient safety culture in China's hospital pharmacies were  
15 measured by using the modified version of Pharmacy Survey on Patient Safety Culture (PSOPSC)  
16 developed by AHRQ (version 2012).[9] We also compared some of the findings with existing data  
17 from the AHRQ pilot study. Meanwhile, we intended to assess the quality of this investigative  
18 questionnaire.

## 19 **Methods**

### 20 **Questionnaire**

21 The Pharmacy Survey on Patient Safety Culture (PSOPSC) was translated and modified to suit the  
22 Chinese system. The original PSOPSC was developed by AHRQ in 2012 on the purpose of pilot  
23 study which was designed to assess 11 dimensions of pharmacy with 36 items of patient safety  
24  
25  
26  
27  
28  
29  
30  
31  
32  
33  
34  
35  
36  
37  
38  
39  
40  
41  
42  
43  
44  
45  
46  
47  
48  
49  
50  
51  
52  
53  
54  
55  
56  
57  
58  
59  
60

1 culture.[9] The questionnaire also included three questions that ask respondents to rate the frequency  
2 with which mistakes were documented and one question that provides an overall rating on patient  
3 safety.[20] Additionally, the original PSOPSC contained a section of “*Background Questions*” as  
4 well as an open ended section. We made a slight emendation of PSOPSC questionnaire by combining  
5 two items—( A3:“*Technicians in this pharmacy receive the training they need to do their jobs*” and  
6 A10: “*Staff get enough training from this pharmacy*”) into one item because they were almost the  
7 same meaning in Chinese translation. Furthermore, we added two items to the section “*Background*  
8 *Questions*”—(gender and hospital levels) and refreshed the qualification categories to adapt to  
9 Chinese context.

10  
11  
12 The survey used either 5-point agreement scales (“Strongly disagree” to “Strongly agree”) or  
13 frequency scales (“Never” to “Always”). Items include a “Does not apply or Don’t know” option.[20]

14  
15 The permission to use PSOPSC was obtained from AHRQ. The Chinese translation was carried  
16 out in several steps. First, the recommended guideline of PSOPSC: *User’s Guide* was carefully  
17 discussed within the research group before translation. The first translation was done by a graduate  
18 medical student with background in patient safety. Then, the translation was double checked and  
19 reviewed by the research group including experts in pharmacy, methodologists, and English. [Finally,](#)  
20 [we pre-test the translation in the pilot investigation for further improvement before formal](#)  
21 [investigation.](#) We had a further discussion regarding to some wordings and especially on some items  
22 that would cause misunderstanding in Chinese language. [\(e.g.the items of “We feel rushed when](#)  
23 [processing prescriptions”, “ Staff feel like their mistakes are held against them”, “Staff feel](#)  
24 [comfortable asking questions when they are unsure about something” and the last section of](#)  
25 [“Documenting Mistakes”\).](#)

## 26 27 28 29 30 31 32 33 34 35 36 37 38 39 40 41 42 43 44 45 46 47 48 49 50 **Sample**

1  
2 Convenient sampling was used to survey hospital pharmacies ([one of the hospital departments](#) )  
3  
4 throughout southwest part of China. The self-administered questionnaire was conducted over six  
5  
6 months from March through August 2013 with 20 hospital pharmacies included([pharmacy workers](#)  
7  
8 [ranging from 30 to 60 in each hospital](#)). We involved in all pharmacy staff ([including senior and](#)  
9  
10 [junior pharmacists and pharmacy interns](#)) working in the pharmacy area where prescriptions were  
11  
12 dropped off, filled, dispensed, and picked up or prepared for delivery.[9]

14 To ensure the privacy of the respondents, the survey was strictly anonymous. Permission to  
15  
16 conduct the investigation was granted by the hospital pharmacy directors before investigation. The  
17  
18 participants were informed of the purpose of the survey and voluntarily completed a paper copy of the  
19  
20 questionnaire by the research coordinators in different hospitals.

### 21 22 **Data screening and collection**

23  
24 After receiving the completed questionnaires, a preprocessing step was applied to remove incomplete  
25  
26 or invalid data and based on the study by Hellings J.[14] We checked and examined the returned  
27  
28 questionnaire. The exclusion criteria were similar to two studies: 1) there was no entire section  
29  
30 completed; 2) there was fewer than half items answered or all the items answered the same.[4,14] All  
31  
32 data was entered by two researchers (Jia PL and Zhang LH) independently, and then were  
33  
34 cross-checked mutually by Epidata (version, 3.02). In case of doubts or disagreement in some  
35  
36 answers, we looked into the original questionnaires. Negatively worded items were reversed to ensure  
37  
38 that positive answers indicated a higher score. Most of the items in the questionnaire used the Likert  
39  
40 5- point response scale of agreement (Strongly disagree to Strongly agree) or frequency (Never to  
41  
42 Always), so the lowest three scoring(1-3) answers (Strongly disagree/Disagree/Neither Agree nor  
43  
44 Disagree or Never/Rarely/Sometimes), the highest two scoring (4-5) answers(Agree /Strongly agree  
45  
46 or Most of the time/Always), as well as the highest two scoring answers were perceived as positive  
47  
48 response answers, and the lowest three scoring answers were deemed other response answer. We  
49  
50  
51  
52  
53  
54  
55  
56  
57  
58  
59  
60



1 calculated the positive response rate according to the formula by the User's Guide of PSOPSC.[9]  
2  
3 Items marked as "Does Not Apply/Don't Know" response option by the respondents were excluded  
4  
5 when displaying percentages of response and the positive response scores.[9]  
6  
7

## 8 **Data analysis**

9  
10 We analyzed the demographic characteristics using the Excel 2007. The number of positive  
11 response/positive response rate of all the items was also summarized. Positive response rate was used  
12 to evaluate the attitudes towards patient safety culture on different dimensions or items. We used  
13 Chi-Square test to compare whether there was a statistical difference on pharmacy staff in hospital  
14 and qualification levels towards patient safety culture. A Chi-squared test was also used to infer if  
15 there was a statistical difference on "*patient safety grade*" in Chinese pharmacies compared with that  
16 of US pharmacies, with the significant level of  $P = 0.05$ .  
17  
18  
19  
20  
21  
22  
23

24 We calculated Cronbach's  $\alpha$  and exploration factor analysis to evaluate the quality of the  
25 questionnaire. Internal consistency value (Cronbach's  $\alpha \geq 0.70$ ) for newly developed scales was  
26 recommended.[4] Structure validity was explored using principal component factor analysis by  
27 Kaiser-Meyer-Olkin Measure of Sampling Adequacy ( $KMO > 0.7$ ) and by Bartlett's Test of Sphericity  
28  $P < 0.05$ .  
29  
30  
31  
32  
33  
34

35 Intercorrelations among 11 dimensions were calculated using the non-parametric Spearman test  
36 as it is adapted to qualitative ordinal variables. The correlations should be less than 0.8 for the  
37 composites to be considered unique and avoid problems with multicollinearity.[12]  
38  
39  
40

41 A test-retest was administered in a specialized hospital to assess the reproducibility. Thirty-three  
42 randomly selected pharmacy staff were asked to answer the questionnaire twice with a 2-week  
43 interval between the test and the retest. Test-retest reliability was assessed by the one-way  
44 intra-class correlation coefficient (ICC type (1, 1)).[21] Reliability was considered good if ICC was  
45 greater than 0.70.[21]  
46  
47  
48  
49  
50  
51  
52  
53  
54  
55  
56  
57  
58  
59  
60

## Ethic

This was a non-interventional survey. We were informed that no required from the ethics committee needed this time by the hospital ethics committee. However, responding to the questionnaire was voluntary and all answers were de-identified to maintain confidentiality.

## Results

### Sample and response statistics

A total of 630 questionnaires were distributed of which 527 were responded validly (84%). Three hundred and seventy nine (72%) of the respondents were female, 421 (80%) were junior pharmacists, followed by pharmacy interns (16%) and senior pharmacists (4%). The majority of the respondents (68%) was from Third-grade hospitals (Table 1).

**Table 1 Demographic characteristics of respondents**

| Characteristics                   | Senior pharmacist<br>(n = 20) | Junior pharmacist<br>(n = 421) | Pharmacy intern<br>(n = 86) | Total<br>(n = 527)     |
|-----------------------------------|-------------------------------|--------------------------------|-----------------------------|------------------------|
| <b>Sex</b>                        |                               |                                |                             |                        |
| Male                              | 4(2.7)                        | 115(77.7)                      | 29(19.6)                    | 148(100 <sup>a</sup> ) |
| Female                            | 16(4.2)                       | 306(80.8)                      | 57(15.0)                    | 379(100)               |
| <b>Working time in hospital</b>   |                               |                                |                             |                        |
| Less than 6 months                | 3(5.6)                        | 40(74.1)                       | 11(20.4)                    | 54(100)                |
| 6 months to less than 1 year      | 5(6.4)                        | 57(73.1)                       | 16(20.5)                    | 78(100)                |
| 1 to 3 years                      | 5(4.0)                        | 104(83.9)                      | 15(12.1)                    | 124(100)               |
| 3 to 6 years                      | 3(3.0)                        | 82(81.2)                       | 16(15.8)                    | 101(100)               |
| 6 to 12 years                     | 1(1.4)                        | 55(77.5)                       | 15(21.5)                    | 71(100)                |
| 12 years or more                  | 3(3.0)                        | 83(83.8)                       | 13(13.1)                    | 99(100)                |
| <b>Working hours per week</b>     |                               |                                |                             |                        |
| 1 to 16 hours                     | 0(0)                          | 14(87.5)                       | 2(12.5)                     | 16(100)                |
| 17 to 31 hours                    | 1(4.5)                        | 18(81.8)                       | 3(13.6)                     | 22(100)                |
| 32 to 40 hours                    | 14(4.7)                       | 244(73.2)                      | 42(14.0)                    | 300(100)               |
| More than 40 hours                | 5(2.6)                        | 145 (76.8)                     | 39(20.6)                    | 189(100)               |
| <b>Hospital level<sup>b</sup></b> |                               |                                |                             |                        |
| Third-grade hospital              | 14(3.9)                       | 290(81.2)                      | 53(14.8)                    | 357(100)               |
| Second-grade hospital             | 6(3.5)                        | 131(77.1)                      | 33(19.4)                    | 170(100)               |

<sup>a</sup> Parenthesis represent percentage

<sup>b</sup> Third-grade hospital: provincial and municipal hospital

1  
2  
3  
4  
5  
6  
7  
8  
9  
10  
11  
12  
13  
14  
15  
16  
17  
18  
19  
20  
21  
22  
23  
24  
25  
26  
27  
28  
29  
30  
31  
32  
33  
34  
35  
36  
37  
38  
39  
40  
41  
42  
43  
44  
45  
46  
47  
48  
49  
50  
51  
52  
53  
54  
55  
56  
57  
58  
59  
60

Second-grade hospital: regional hospital

For peer review only

1  
2  
3  
4  
5  
6  
7  
8  
9  
10  
11  
12  
13  
14  
15  
16  
17  
18  
19  
20  
21  
22  
23  
24  
25  
26  
27  
28  
29  
30  
31  
32  
33  
34  
35  
36  
37  
38  
39  
40  
41  
42  
43  
44  
45  
46  
47  
48  
49  
50  
51  
52  
53  
54  
55  
56  
57  
58  
59  
60

In our study, the percentage of positive responses for the 11 patient safety culture dimensions ranged from 50% to 88%, the mean positive response rate was 71%. The lowest positive response rate of dimension was “*Staffing, Work Pressure, and Pace*” (50%), while the highest positive response rate of dimension was “*Staff Training and Skills*” (88%). There were two dimensions of which positive response rate were less than 60% such as “*Patient Counseling*”(57%), and “*Staffing, Work Pressure, and Pace*” (50%). The positive response rate for the rest of the items ranged from 37% to 90%. The highest positive response rate of the three items reached 90% , while the lowest positive response rate of the item was “*Staff feel like their mistakes are held against them*”(37%)(Table 2).

However, the 2012 Preliminary Comparative Results: PSOPSC in US showed that the average positive response rate of 11 dimensions ranged from 41% to 90%, the overall average positive response rate for dimensions was 78%. The lowest positive response rate of item was “*We feel rushed when processing prescriptions*”(14%) and the highest positive response rate item was “*Our pharmacists tell patients important information about their new prescriptions*” (93%). There were 4 items of which the positive response rate were less than 60% (Table 2).

There were some differences between the adapted Chinese PSOPSC with that of original US PSOPSC, so only the same items were compared to explore the differences of perceptions towards patient safety culture between the two countries. The results showed that there was a significant difference on three items ( $P < 0.05$ ) of which the positive response rate on three items in China was higher than that of the US. These dimensions were (1) *Teamwork*, (2) *Staffing, Work Pressure, and Pace*. However, there was a significant difference on 18 items ( $P < 0.05$ ), which of the positive response rate on 18 items in China was lower than that of the US (Table 2).

**Table2 Positive response rate of each item , Cronbach's  $\alpha$  for dimensions and reproducibility**

| <b>Dimension/items(internal consistency reliability coefficient)</b>                                                                                            | <b>US</b> | <b>China</b> | <b>ICC</b> |
|-----------------------------------------------------------------------------------------------------------------------------------------------------------------|-----------|--------------|------------|
| <b>1 Physical Space and Environment</b> (Cronbach's $\alpha=0.60$ )                                                                                             | 72%       | 69%          |            |
| A1. This pharmacy is well organized.                                                                                                                            | 84%       | 84%          | 0.86       |
| A5. This pharmacy is free of clutter                                                                                                                            | 67%       | 53%          | 0.80       |
| A7. The physical layout of this pharmacy supports good workflow.                                                                                                | 65%       | 69%          | 0.69       |
| <b>2. Teamwork</b> (Cronbach's $\alpha=0.44$ )                                                                                                                  | 81%       | 84%          |            |
| A2. Staff treat each other with respect.                                                                                                                        | 79%       | 86%          | 0.74       |
| A4. Staff in this pharmacy clearly understand their roles and responsibilities.                                                                                 | 81%       | 90%          | 0.86       |
| A9. Staff work together as an effective team.                                                                                                                   | 82%       | 77%          | 0.80       |
| <b>3. Staff Training and Skills</b> (Cronbach's $\alpha=0.75$ )                                                                                                 | 79%       | 88%          |            |
| A3. Technicians in this pharmacy receive the training they need to do their jobs                                                                                | 81%       | 87%          | 0.78       |
| A6. Staff in this pharmacy have the skills they need to do their jobs well.                                                                                     | 86%       | 90%          | 0.86       |
| A8. Staff who are new to this pharmacy receive adequate orientation                                                                                             | 72%       | 88%          | 0.86       |
| <b>4. Communication Openness</b> (Cronbach's $\alpha=0.57$ )                                                                                                    | 87%       | 64%          |            |
| B1. Staff ideas and suggestions are valued in this pharmacy                                                                                                     | 81%       | 64%          | 0.30       |
| B5. Staff feel comfortable asking questions when they are unsure about something                                                                                | 91%       | 72%          | 0.88       |
| B10. It is easy for staff to speak up to their supervisor/ manager about patient safety concerns                                                                | 88%       | 57%          | 0.52       |
| <b>5. Patient Counseling</b> (Cronbach's $\alpha=0.69$ )                                                                                                        | 90%       | 57%          |            |
| B2. We encourage patients to talk to pharmacists about their medications.                                                                                       | 92%       | 56%          | 0.80       |
| B7. Our pharmacists spend enough time talking to patients about how to use their medications                                                                    | 86%       | 52%          | 0.94       |
| B11. Our pharmacists tell patients important information about their new prescriptions                                                                          | 93%       | 63%          | 0.73       |
| <b>6. Staffing, Work Pressure, and Pace</b> (Cronbach's $\alpha=0.50$ )                                                                                         | 41%       | 50%          |            |
| B3. Staff take adequate breaks during their shifts                                                                                                              | 56%       | 60%          | 0.92       |
| B9. We feel rushed when processing prescriptions. (negatively worded)                                                                                           | 14%       | 40%          | 0.81       |
| B12. We have enough staff to handle the workload.                                                                                                               | 56%       | 62%          | 0.92       |
| B16. Interruptions/distractions in this pharmacy (from phone calls, faxes, customers, etc.) make it difficult for staff to work accurately. (negatively worded) | 40%       | 37%          | 0.72       |
| <b>7. Communication About Prescriptions Across Shifts</b> (Cronbach's $\alpha=0.84$ )                                                                           | 81%       | 79%          |            |
| B4. We have clear expectations about exchanging important prescription information across shifts                                                                | 84%       | 83%          | 0.79       |
| B6. We have standard procedures for communicating prescription information across shifts.                                                                       | 78%       | 77%          | 0.72       |
| B14. The status of problematic prescriptions is well communicated across shifts                                                                                 | 81%       | 77%          | 0.76       |
| <b>8. Communication About Mistakes</b> (Cronbach's $\alpha=0.17$ )                                                                                              | 79%       | 62%          |            |
| B8. Staff in this pharmacy discuss mistakes.                                                                                                                    | 74%       | 50%          | 0.93       |
| B13. When patient safety issues occur in this pharmacy, staff discuss them.                                                                                     | 84%       | 57%          | 0.73       |
| B15. In this pharmacy, we talk about ways to prevent mistakes from happening again.                                                                             | 81%       | 78%          | 0.68       |
| <b>9. Response to Mistakes</b> (Cronbach's $\alpha=0.57$ )                                                                                                      | 79%       | 65%          |            |
| C1. Staff are treated fairly when they make mistakes                                                                                                            | 80%       | 81%          | 0.71       |
| C4. This pharmacy helps staff learn from their mistakes rather than punishing them                                                                              | 84%       | 66%          | 0.84       |
| C7. We look at staff actions and the way we do things to understand why mistakes happen in this pharmacy.                                                       | 84%       | 76%          | 0.86       |
| C8. Staff feel like their mistakes are held against them. (negatively worded)                                                                                   | 69%       | 37%          | 0.66       |
| <b>10. Organizational Learning—Continuous Improvement</b> (Cronbach's $\alpha=0.48$ )                                                                           | 83%       | 84%          |            |
| C2. When a mistake happens, we try to figure out what problems in the work process led to the mistake.                                                          | 90%       | 90%          | 0.74       |
| C5. When the same mistake keeps happening, we change the way we do things                                                                                       | 82%       | 81%          | 0.71       |
| C10. Mistakes have led to positive changes in this pharmacy                                                                                                     | 79%       | 82%          | 0.76       |
| <b>11. Overall Perceptions of Patient Safety</b> (Cronbach's $\alpha=0.45$ )                                                                                    | 84%       | 80%          |            |
| C3. This pharmacy places more emphasis on sales than on patient safety. (negatively worded)                                                                     | 80%       | 79%          | 0.73       |
| C6. This pharmacy is good at preventing mistakes.                                                                                                               | 85%       | 76%          | 0.94       |
| C9. The way we do things in this pharmacy reflects a strong focus on patient safety.                                                                            | 86%       | 84%          | 0.68       |
| ICC, intra-class correlation coefficient                                                                                                                        |           |              |            |

## Comparative results

The results showed that there was a significant difference on seven dimensions between Third-grade hospital and Second-grade hospital ( $P < 0.05$ ). The positive response rate of five items of Third-grade hospitals was lower than that of Second-grade hospitals: (1) *This pharmacy is free of clutter* (2) *Our pharmacists spend enough time talking to patients about how to use their medications* (3) *Staff take adequate breaks during their shifts* (4) *We feel rushed when processing prescription* (5) *Interruptions/distractions in this pharmacy make it difficult for staff to work accurately* ( $P < 0.05$ ).

The positive response rate of other items of Third-grade hospitals was higher than that of Second-grade hospitals (Table 3).

Incidence of patient safety events was closely related to the qualification levels of pharmacists. Our results showed that there was a significant difference in the positive response rate on two dimensions (“*Staffing, Work Pressure, and Pace*” and “*Communication About Prescriptions Across Shifts*”,  $P < 0.05$ ) for senior pharmacists, junior pharmacists and pharmacy intern. Furthermore, the positive response rate of pharmacists with high qualification (senior pharmacists) was higher than those with low qualification level (junior pharmacists) on the two items: “*Staff take adequate breaks during their shifts*” and “*We have standard procedures for communicating prescription information across shifts*”  $P < 0.05$  (Table 3).

1  
2  
3  
4  
5  
6  
7  
8  
9  
10  
11  
12  
13  
14  
15  
16  
17  
18  
19  
20  
21  
22  
23  
24  
25  
26  
27  
28  
29  
30  
31  
32  
33  
34  
35  
36  
37  
38  
39  
40  
41  
42  
43  
44  
45  
46  
47  
48  
49  
50  
51  
52  
53  
54  
55  
56  
57  
58  
59  
60

Table 3 The comparison of attitudes of different levels of hospitals and qualification of hospital pharmacists on patient safety culture

| Items                                                                                                                                           | Hospital Levels      |     |                       |     | $\chi^2$ | p     | Qualification Levels |     |                   |     |              |
|-------------------------------------------------------------------------------------------------------------------------------------------------|----------------------|-----|-----------------------|-----|----------|-------|----------------------|-----|-------------------|-----|--------------|
|                                                                                                                                                 | Third-grade Hospital |     | Second-grade Hospital |     |          |       | Senior Pharmacist    |     | Junior Pharmacist |     | Pharm Intern |
|                                                                                                                                                 | NPR                  | NOR | NPR                   | NOR |          |       | NPR                  | NOR | NPR               | NOR | NPR          |
| organized.                                                                                                                                      | 316                  | 41  | 123                   | 47  | 21.63    | 0.000 | 18                   | 2   | 355               | 66  | 66           |
| of clutter                                                                                                                                      | 171                  | 186 | 107                   | 63  | 10.45    | 0.001 | 12                   | 8   | 223               | 198 | 43           |
| this pharmacy supports good workflow.                                                                                                           | 236                  | 121 | 123                   | 47  | 2.07     | 0.15  | 16                   | 4   | 288               | 133 | 55           |
| with respect.                                                                                                                                   | 308                  | 49  | 141                   | 29  | 1.01     | 0.31  | 18                   | 2   | 360               | 61  | 71           |
| clearly understand their roles and responsibilities.                                                                                            | 321                  | 36  | 150                   | 27  | 0.34     | 0.56  | 19                   | 1   | 312               | 49  | 80           |
| an effective team.                                                                                                                              | 283                  | 74  | 116                   | 54  | 7.63     | 0.006 | 16                   | 4   | 321               | 100 | 62           |
| pharmacists receive the training they need to do their jobs                                                                                     | 308                  | 49  | 139                   | 31  | 1.82     | 0.18  | 14                   | 6   | 353               | 68  | 73           |
| have the skills they need to do their jobs well.                                                                                                | 319                  | 38  | 150                   | 27  | 0.15     | 0.70  | 19                   | 1   | 376               | 45  | 74           |
| this pharmacy receive adequate orientation                                                                                                      | 309                  | 48  | 144                   | 26  | 0.33     | 0.57  | 17                   | 3   | 360               | 61  | 76           |
| pharmacists are valued in this pharmacy                                                                                                         | 220                  | 137 | 101                   | 69  | 0.24     | 0.63  | 16                   | 4   | 253               | 168 | 52           |
| ask the questions when they are unsure about something                                                                                          | 255                  | 102 | 110                   | 60  | 2.45     | 0.12  | 17                   | 3   | 289               | 132 | 59           |
| report up to their supervisor/ manager about patient safety concerns in this pharmacy.                                                          | 193                  | 164 | 92                    | 78  | 0.000    | 0.99  | 9                    | 11  | 232               | 189 | 44           |
| to talk to pharmacists about their medications.                                                                                                 | 192                  | 165 | 87                    | 83  | 0.31     | 0.58  | 14                   | 6   | 217               | 204 | 48           |
| enough time talking to patients about how to use their medications                                                                              | 274                  | 83  | 137                   | 33  | 0.99     | 0.32  | 13                   | 7   | 231               | 208 | 46           |
| patients important information about their new prescriptions                                                                                    | 214                  | 143 | 94                    | 76  | 1.03     | 0.31  | 12                   | 8   | 247               | 174 | 49           |
| breaks during their shifts                                                                                                                      | 187                  | 170 | 121                   | 49  | 16.75    | 0.000 | 18                   | 2   | 245               | 176 | 45           |
| processing prescriptions. (negatively worded)                                                                                                   | 110                  | 247 | 87                    | 83  | 20.40    | 0.000 | 8                    | 12  | 153               | 268 | 36           |
| to handle the workload.                                                                                                                         | 212                  | 145 | 202                   | 68  | 0.02     | 0.89  | 15                   | 5   | 251               | 170 | 48           |
| tasks in this pharmacy (from phone calls, faxes, customers, etc.) make it difficult for pharmacists to respond to patients. (negatively worded) | 116                  | 241 | 71                    | 99  | 4.32     | 0.04  | 6                    | 14  | 147               | 274 | 34           |
| pharmacists about exchanging important prescription information across shifts                                                                   | 171                  | 186 | 101                   | 69  | 6.11     | 0.01  | 17                   | 3   | 333               | 88  | 61           |
| methods for communicating prescription information across shifts.                                                                               | 241                  | 116 | 126                   | 44  | 2.28     | 0.12  | 16                   | 4   | 303               | 118 | 48           |
| patient prescriptions is well communicated across shifts                                                                                        | 257                  | 100 | 126                   | 44  | 0.26     | 0.61  | 18                   | 2   | 307               | 114 | 58           |
| discuss mistakes.                                                                                                                               | 180                  | 177 | 72                    | 98  | 3.00     | 0.08  | 11                   | 9   | 201               | 220 | 40           |
| issues occur in this pharmacy, staff discuss them.                                                                                              | 208                  | 149 | 84                    | 86  | 3.65     | 0.06  | 11                   | 9   | 233               | 188 | 48           |
| talk about ways to prevent mistakes from happening again.                                                                                       | 283                  | 74  | 116                   | 54  | 7.63     | 0.006 | 16                   | 4   | 319               | 102 | 64           |
| when they make mistakes                                                                                                                         | 287                  | 70  | 131                   | 39  | 0.78     | 0.38  | 17                   | 3   | 330               | 91  | 71           |
| staff learn from their mistakes rather than punishing them                                                                                      | 222                  | 135 | 120                   | 50  | 3.57     | 0.06  | 15                   | 5   | 275               | 146 | 52           |
| reasons and the way we do things to understand why mistakes happen in this pharmacy.                                                            | 268                  | 89  | 117                   | 53  | 2.28     | 0.13  | 15                   | 5   | 313               | 108 | 57           |
| mistakes are held against them. (negatively worded)                                                                                             | 118                  | 239 | 68                    | 102 | 2.43     | 0.12  | 5                    | 15  | 152               | 269 | 29           |
| pharmacists try to figure out what problems in the work process led to the mistake.                                                             | 323                  | 34  | 145                   | 25  | 3.11     | 0.08  | 19                   | 1   | 371               | 50  | 78           |
| when a mistake is happening, we change the way we do things                                                                                     | 291                  | 66  | 127                   | 43  | 3.25     | 0.07  | 18                   | 2   | 335               | 86  | 65           |
| positive changes in this pharmacy                                                                                                               | 298                  | 59  | 118                   | 52  | 13.70    | 0.000 | 16                   | 4   | 337               | 84  | 63           |
| more emphasis on sales than on patient safety. (negatively worded)                                                                              | 274                  | 83  | 132                   | 38  | 0.05     | 0.82  | 17                   | 3   | 323               | 98  | 66           |
| at preventing mistakes.                                                                                                                         | 276                  | 81  | 116                   | 54  | 4.98     | 0.03  | 17                   | 3   | 315               | 106 | 60           |
| in this pharmacy reflects a strong focus on patient safety.                                                                                     | 306                  | 51  | 129                   | 41  | 7.73     | 0.005 | 19                   | 1   | 351               | 70  | 65           |
| pharmacists know the patient and could cause harm but does not, how often is it documented?                                                     | 200                  | 157 | 99                    | 71  | 0.23     | 0.63  | 12                   | 8   | 243               | 178 | 44           |
| pharmacists know the patient but has no potential to harm the patient, how often is it documented?                                              | 207                  | 150 | 95                    | 75  | 0.21     | 0.65  | 13                   | 7   | 246               | 175 | 43           |
| pharmacists know the patient and could cause harm but does not, how often is it documented?                                                     | 209                  | 148 | 95                    | 75  | 0.33     | 0.56  | 14                   | 6   | 244               | 177 | 41           |

of positive response answers; NOR, Number of other response

## Patient safety grade in China and the US and different qualification levels

The percentage of staff who rated the level of patient safety as “good”, “very good” or “Excellent” was 79% in our study, which was lower than the US score of 95%, there was a significant difference between the two groups ( $P < 0.001$ ). While there was no significant difference on “Patient safety grade” in different qualification levels ( $P = 0.66$ ) (Table 4).

Table 4 The comparisons of patient safety grade between different position of hospital pharmacists

| Patient safety grade | Senior Pharmacist (%) | Junior Pharmacist (%) | Pharmacy Intern (%) | China (%) | US (%)  |
|----------------------|-----------------------|-----------------------|---------------------|-----------|---------|
| Excellent            | 2 <sup>a</sup> (6.5)  | 25(80.6)              | 4(12.9)             | 84(16)    | 191(40) |
| Very good            | 1(1.2)                | 69(85.2)              | 11(13.6)            | 227(43)   | 211(44) |
| Good                 | 6(5.6)                | 80(74.8)              | 21(19.6)            | 105(20)   | 53(11)  |
| Fair                 | 7(3.1)                | 184(81.4)             | 35(15.5)            | 79(15)    | 24(5)   |
| Poor                 | 4(4.9)                | 63(76.8)              | 15(18.30)           | 32(6)     | 0       |

<sup>a</sup> number of the respondents



## Reliability and validity

In our research, the Cronbach's alpha was of 0.89 for the questionnaire and ranged from 0.17 to 0.83 for dimensions. The dimension "*Communication About Mistakes*" had the lowest coefficients of 0.17 (Table 2). Yet in the US, the Cronbach's  $\alpha$  was ranged from 0.68 to 0.89 for dimensions of which "*Staffing, Work Pressure, and Pace*" had the lowest values of 0.68.

Bartlett's test of the 35 items on patient safety culture demonstrated a sufficient inter-item correlation:  $\chi^2 = 12037.98$ ,  $df = 595$ ,  $P < 0.01$ . Furthermore, the Kaiser–Meyer–Olkin measure of sampling adequacy was satisfactory, with a value of 0.935. Explorative factor analysis was performed using principal component analysis with varimax rotation drawing seven factors. The factors cumulatively explained 59 % of the variance in the survey and the result was acceptable.

Thirty-three participants answered twice to the questionnaire. For the 35 items, an ICC ranged from 0.30 to 0.94. Twenty-nine items had an ICC above 0.70, five items had an ICC between 0.50 and 0.70 and one item had an ICC under 0.50 (Table 2).

The inter-correlations of the 11 dimensions, and correlations between the scale scores were also calculated. No dimension had high correlations above 0.80, with other dimensions. "*Communication Openness*" and "*Patient Counseling*" ( $r = 0.74$ ) was most correlated, while "*Staffing, Work Pressure, and Pace*" and "*Overall Perceptions of Patient Safety*" ( $r = 0.01$ ) was least correlated. The highest intercorrelations was 0.78 between "*Communication Openness*" and the scale ( $r = 0.78$ ). The correlation between each dimension and the total scale were significantly different (Table 5).

Table 5 Correlation with the total scale and inter-correlations of the 11 dimensions

| Dimensions                                             | 1    | 2    | 3    | 4    | 5    | 6    | 7    | 8    | 9    | 10    | 11   | Total |
|--------------------------------------------------------|------|------|------|------|------|------|------|------|------|-------|------|-------|
| 1. Physical Space and Environment                      | 1.00 | 0.15 | 0.12 | 0.27 | 0.25 | 0.22 | 0.26 | 0.22 | 0.73 | 0.61  | 0.15 | 0.14* |
| 2. Teamwork                                            |      | 1.00 | 0.12 | 0.44 | 0.30 | 0.28 | 0.31 | 0.28 | 0.64 | 0.55  | 0.15 | 0.14* |
| 3. Staff Training and Skills                           |      |      | 1.00 | 0.39 | 0.34 | 0.33 | 0.44 | 0.33 | 0.56 | 0.44  | 0.09 | 0.16* |
| 4. Communication Openness                              |      |      |      | 1.00 | 0.74 | 0.63 | 0.37 | 0.57 | 0.37 | 0.36  | 0.03 | 0.78* |
| 5. Patient Counseling                                  |      |      |      |      | 1.00 | 0.70 | 0.70 | 0.70 | 0.20 | 0.02  | 0.05 | 0.76* |
| 6. Staffing, Work Pressure, and Pace                   |      |      |      |      |      | 1.00 | 0.68 | 0.69 | 0.02 | -0.05 | 0.01 | 0.77* |
| 7. Communication About Prescriptions<br>Across Shifts  |      |      |      |      |      |      | 1.00 | 0.68 | 0.20 | 0.05  | 0.07 | 0.75* |
| 8. Communication About Mistakes                        |      |      |      |      |      |      |      | 1.00 | 0.20 | -0.05 | 0.10 | 0.77* |
| 9. Response to Mistakes                                |      |      |      |      |      |      |      |      | 1.00 | 0.32  | 0.04 | 0.17* |
| 10. Organizational Learning—<br>Continuous Improvement |      |      |      |      |      |      |      |      |      | 1.00  | 0.12 | 0.18* |
| 11. Overall Perceptions of Patient Safety              |      |      |      |      |      |      |      |      |      |       | 1.00 | 0.13* |

\*All correlations are significant at  $P < 0.001$

1 Finally, table 6 presented the factor loadings for each item (all loadings > 0.30). Factor one loadings  
2 on five dimensions, and factor two loading on three dimensions (*“Physical*  
3 *Space and Environment”*, *“Teamwork”* and *“Staff Training and Skills”*), and factor three on *“Overall*  
4 *Perceptions of Patient Safety”*.  
5  
6  
7  
8  
9  
10  
11  
12  
13  
14  
15  
16  
17  
18  
19  
20  
21  
22  
23  
24  
25  
26  
27  
28  
29  
30  
31  
32  
33  
34  
35  
36  
37  
38  
39  
40  
41  
42  
43  
44  
45  
46  
47  
48  
49  
50  
51  
52  
53  
54  
55  
56  
57  
58  
59  
60

Table 6 Factors loading in each item

| Items                                                                                                                                                          | 1    | 2    | 3     | 4    | 5     | 6    | 7     |
|----------------------------------------------------------------------------------------------------------------------------------------------------------------|------|------|-------|------|-------|------|-------|
| 1. This pharmacy is well organized.                                                                                                                            |      | 0.78 |       |      |       |      |       |
| 2. This pharmacy is free of clutter                                                                                                                            |      | 0.55 |       |      |       |      |       |
| 3. The physical layout of this pharmacy supports good workflow.                                                                                                |      | 0.72 |       |      |       |      |       |
| 4. Staff treat each other with respect.                                                                                                                        |      | 0.82 |       |      |       |      |       |
| 5. Staff in this pharmacy clearly understand their roles and responsibilities.                                                                                 |      | 0.47 |       |      |       |      | 0.30  |
| 6. Staff work together as an effective team.                                                                                                                   |      | 0.80 |       |      |       |      |       |
| 7. Technicians in this pharmacy receive the training they need to do their jobs                                                                                |      | 0.41 |       |      |       |      |       |
| 8. Staff in this pharmacy have the skills they need to do their jobs well.                                                                                     |      | 0.41 |       |      |       |      |       |
| 9. Staff who are new to this pharmacy receive adequate orientation                                                                                             |      | 0.66 |       |      |       |      |       |
| 10. Staff ideas and suggestions are valued in this pharmacy                                                                                                    | 0.73 |      |       |      |       |      |       |
| 11. Staff feel comfortable asking questions when they are unsure about something                                                                               | 0.97 |      |       |      |       |      |       |
| 12. It is easy for staff to speak up to their supervisor/ manager about patient safety concerns in this pharmacy.                                              | 0.95 |      |       |      |       |      |       |
| 13. We encourage patients to talk to pharmacists about their medications.                                                                                      | 0.96 |      |       |      |       |      |       |
| 14. Our pharmacists spend enough time talking to patients about how to use their medications                                                                   | 0.96 |      |       |      |       |      |       |
| 15. Our pharmacists tell patients important information about their new prescriptions                                                                          | 0.61 |      |       |      |       |      |       |
| 16. Staff take adequate breaks during their shifts                                                                                                             | 0.73 |      |       |      |       |      |       |
| 17. We feel rushed when processing prescriptions. (negatively worded)                                                                                          | 0.92 |      |       |      |       |      |       |
| 18. We have enough staff to handle the workload.                                                                                                               | 0.61 |      |       |      |       |      |       |
| 19. Interruptions/distractions in this pharmacy (from phone calls, faxes, customers, etc.) make it difficult for staff to work accurately. (negatively worded) | 0.94 |      |       |      |       |      |       |
| 20. We have clear expectations about exchanging important prescription information across shifts                                                               | 0.73 |      |       |      |       |      |       |
| 21. We have standard procedures for communicating prescription information across shifts.                                                                      | 0.72 |      |       |      |       |      |       |
| 22. The status of problematic prescriptions is well communicated across shifts                                                                                 | 0.96 |      |       |      |       |      |       |
| 23. Staff in this pharmacy discuss mistakes.                                                                                                                   | 0.74 |      |       |      |       |      |       |
| 24. When patient safety issues occur in this pharmacy, staff discuss them.                                                                                     | 0.60 |      |       |      |       |      |       |
| 25. In this pharmacy, we talk about ways to prevent mistakes from happening again.                                                                             | 0.53 |      |       |      |       |      |       |
| 26. Staff are treated fairly when they make mistakes                                                                                                           |      |      |       | 0.92 |       |      |       |
| 27. This pharmacy helps staff learn from their mistakes rather than punishing them                                                                             |      | 0.65 |       |      |       |      |       |
| 28. We look at staff actions and the way we do things to understand why mistakes happen in this pharmacy.                                                      |      | 0.68 |       |      |       |      |       |
| 29. Staff feel like their mistakes are held against them. (negatively worded)                                                                                  |      | 0.41 |       |      | 0.54  |      |       |
| 30. When a mistake happens, we try to figure out what problems in the work process led to the mistake.                                                         |      |      |       |      | -0.75 |      |       |
| 31. When the same mistake keeps happening, we change the way we do things                                                                                      |      | 0.69 |       |      |       |      |       |
| 32. Mistakes have led to positive changes in this pharmacy                                                                                                     |      |      |       | 0.91 |       |      |       |
| 33. This pharmacy places more emphasis on sales than on patient safety. (negatively worded)                                                                    |      |      | -0.71 |      |       |      |       |
| 34. This pharmacy is good at preventing mistakes.                                                                                                              | 0.39 | 0.71 |       |      |       |      |       |
| 35. The way we do things in this pharmacy reflects a strong focus on patient safety.                                                                           |      | 0.43 |       |      |       | 0.33 | -0.35 |

## Discussion

The study is the first publication of its kind using the PSOPSC to explore patient culture in hospital pharmacy sector. It is, furthermore, the first Chinese study to report data on perspectives of patient culture in different levels of qualification and hospital in pharmacy setting. The PSOPSC has been introduced by AHRQ for about one year which was only conducted for pilot study in US pharmacies.[20] We adopted this survey in our research, because we take the consideration that this is a very comprehensive patient safety culture survey focused on the pharmacy sector which is best suitable for examining patient safety climate from a hospital pharmacy perspective. Moreover, the survey will enable the pharmacies to assess areas of strength and identify areas for improvement in their patient safety culture as part of their quality improvement activities.

In our study, the response rate was 84% which was higher than the pilot study implemented in US (75%).[20] A high response rate on a questionnaire about safety attitudes might be a measure of the staff's attentiveness to these issues.[22] Overall, the mean positive response rate for the 11 patient safety culture dimensions of the PSOPSC survey was 71%, slightly higher than the other two studies conducted in Taiwan by Chen 2012[23] and the mainland of China by Nie 2013.[4] Comparing with these two studies, we found that the three studies have a common feature that they predominantly used surveys to assess individual attitudes covering areas related to work environment, adherence to guidelines and safety concerns.[24] The only difference is that Chen and Nie used the Hospital Survey on Patient Safety Culture (HSPSC) for all health care workers within organizational level, while we

1  
2 used PSOPSC for hospital pharmacy workers which thereby, elicits a snapshot of the safety climate in  
3  
4 the specific setting. Meanwhile, in some other studies, the pharmacists surveyed were relatively in a  
5  
6 small size in their study populations, such as the HSPSC study in Japan by Shinya Ito, 155(2.4%)  
7  
8 pharmacists were included,[11] and the HSPSC study in US by Joann S Sorra, 1215(2%) pharmacists  
9  
10 were included.[12]  
11  
12

13  
14  
15 Our study found that there was substantial variability in the percent of positive scores across  
16  
17 11 dimensions. The dimension “*Staff Training and Skill*” appeared to receive the highest positive  
18  
19 response rate (88%). An explanation for this might be the fact that the national job training project for  
20  
21 pharmacists in China named ‘*Clinical Pharmacist pilot Training*’ for a long time put great effort into  
22  
23 providing clinical pharmacy training for pharmacists who are working or will work as clinical  
24  
25 pharmacists from different hospitals.[25] But another possible reason is that the relatively high  
26  
27 proportion of positive responses might be that the translation was inadequate, and that a ceiling effect  
28  
29 occurred.[10] Simultaneously, the dimension “*Teamwork*” received a positive response rate of 84% in  
30  
31 our study, which is similar to the studies reported by Belgium,[14] Turkey,[26] Swedish,[10] US,[27],  
32  
33 China[4] and Taiwan[23] ( 70%,76%,78%,80%,84%,and 94% ,respectively). The interpretation of the  
34  
35 results within a given setting is that if  $\geq 80\%$  of the respondents report positive assessments on a  
36  
37 specific item or set of items, then there is a strong positive consensus in that setting.[10] A score of  
38  
39 less than 60% is considered to be in the "needs improvement," range.[10] Hence,  $\geq 60\%$  is a  
40  
41 threshold for which safety climate can be considered acceptable. ~~Hooly, we can conclude that the~~  
42  
43  
44  
45  
46  
47  
48  
49  
50  
51  
52  
53  
54  
55  
56  
57  
58  
59  
60

1  
2  
3 ~~respondents were delight in cooperating with others and well functioning relative to hospital~~  
4  
5 ~~departments.~~  
6

7  
8 This study displayed that both in China and US, the dimensions that received the lowest positive  
9  
10 rate was “*Staffing, Work Pressure, and Pace*”(50% and 41%, respectively), indicating that the  
11  
12 respondents feel that staff allocation is not adequate to handle patient safety related workload.[4] Our  
13  
14 results are according with those reported by Hellings and the study conducted in Taiwan and China.  
15  
16 [4,14,23,28] Meanwhile, a study by Elisa E in Northern California hospital of US showed that the  
17  
18 most common causes of medication errors were high workload (25.3%), fatigue or lack of sleep  
19  
20 (16.5%).[29] Therefore it is important for pharmacy to allocate staffs and working hours more  
21  
22 adequately to reduce the medication errors and improve patient safety. In addition, in our study,  
23  
24 another relatively low positive response rate was the dimension “*Patient Counseling*” (57%) which  
25  
26 reflected the problem in China: poor ~~healthcare worker (including pharmacy staff)doctor~~-patient  
27  
28 communication. A study by Zou in China indicated that 49% medical lawsuits related to poor  
29  
30 ~~healthcare worker~~doctor-patient communication.[30] A study by Moore P showed that of 635  
31  
32 complaints involved a doctor, 49 cases (15%) were because of "Lack of communication".[31] Lack of  
33  
34 ‘communication openness’ was identified as a major safety culture problem. In other words,  
35  
36 communication openness was seriously jeopardised by the lack of trust between health workers and  
37  
38 patients in China reported by Liu in the recent study.[32]  
39  
40  
41  
42  
43  
44  
45  
46  
47  
48  
49

50 The results showed that the positive response numbers of Third-grade hospital regarding  
51  
52  
53  
54  
55  
56  
57  
58  
59  
60

1  
2 patient safety culture was higher than that of Second-grade hospital. The reason account for this may  
3  
4 be that in China, the Third-grade hospital always manage severe clinical cases so the pharmacies of  
5  
6 Third-grade hospital have a higher potential for life-threatening medical errors. As most risky medical  
7  
8 interventions take place in these hospitals, the staff have to get better training to deal with in  
9  
10 safety-related issues.[26] Simultaneously, our study found that the positive response rate of  
11  
12 pharmacists with high qualification (senior pharmacists) was higher than those with low qualification  
13  
14 level (junior pharmacists ) on the dimension “*Staffing, Work Pressure, and Pace*”. Seniority has been  
15  
16 found to bring about experience,[22] as they know the pitfalls of the pharmacy work and can avoid  
17  
18 them masterly which might reduce the risk for error making, so senior pharmacists might work more  
19  
20 effectively and had a positive attitude to their work pressure. This was also elucidated in the study by  
21  
22 Sorlie V that the more experience physicians gained, the more confident they would feel.[33] So we  
23  
24 can infer that the experiential proficiency is a prerequisite to this higher positive response.  
25  
26  
27  
28  
29  
30  
31  
32  
33

34 The pharmacy is an important link between the patient and medication, so developing a culture  
35  
36 of safety has become one of the pillars of the pharmacy. According to the report of China Food and  
37  
38 Drug Administration(CFDA), a total of 852,799 drug adverse events happened in China in 2011.[7]  
39  
40 Chinese Hospital Association (CHA) estimated that adverse events affect 1.6 ~ 7.6 million  
41  
42 hospitalizations annually in Chinese hospitals.[34] A study by Li,XL showed that 1165 medication  
43  
44 errors reported by 22 hospitals in Beijing in 2012[35]and another study by Li,XY in China indicating  
45  
46 that 32 (26.30%) dispensing errors were applied to the pharmacists and 5 (4.03%) dispensing errors  
47  
48  
49  
50  
51  
52  
53  
54  
55  
56  
57  
58  
59  
60



1  
2 were related to the environment of the pharmacy.[36] The adaptation of this instrument to the Chinese  
3  
4 pharmacy context not only is an important milestone for safety research in pharmacies but also  
5  
6 provides the pharmacies with an instrument that generates diagnostic and actionable information for  
7  
8 pharmacies and leaders to use in guiding improvement efforts.[37] The findings of the study  
9  
10 illustrated that the pharmacies and health care organizations in China should have imperatives to  
11  
12 develop strategies to improve pharmacy service quality and ensure patient safety. These strategies  
13  
14 include: strengthen patient safety training for pharmacy staffs, reasonable allocate staff and workload,  
15  
16 creating an environment conducive to reporting errors by focusing on the process or system failure  
17  
18 instead of the individual who committed the error.[38] What's more, we should raise awareness of the  
19  
20 important of patient engagement in improving medication safety because a global concerted effort is  
21  
22 need to address medication safety and it needs the involvement of all health-care stakeholders,  
23  
24 including patient. In addition, building trust between providers and patients and between managers  
25  
26 and health workers is essential for empowering health workers to address patient safety issues.[32]

### 37 **Reliability and validity**

38 [Using the explorative factor analysis drew 7 factors. The factors cumulatively explained 59 % of the](#)  
39  
40 [variance in the survey and the result was acceptable.](#) Using Cronbach's  $\alpha$ , all subscales had acceptable  
41  
42 levels of reliability, which varied from 0.84 for "*Communication About Prescriptions Across Shifts*"  
43  
44 to 0.44 for "*Teamwork*", with the exception of the dimension "*Communication about Mistakes*" which  
45  
46 had the lowest value 0.17. The results were less satisfactory as compared to AHRQ data.[20] The  
47  
48  
49  
50  
51  
52  
53  
54  
55  
56  
57  
58  
59  
60

1  
2 dimension “*Communication about Mistakes*” received the lowest Cronbach’s  $\alpha$  among the 11  
3  
4  
5 dimensions, three reasons could account for this. Firstly, a possible explanation was the translation,  
6  
7  
8 scale should not be translated and applied in another setting of a different cultural context directly.[4]  
9  
10 Secondly, factor structure of the PSOPSC model for these items might not fit the data well.[23]  
11  
12  
13 Thirdly, the sample size of the data might not be large enough to achieve consistency.[23] But, the low  
14  
15 reliability also suggested the instability of the aspects measured by the questionnaire, which are based  
16  
17  
18 on professionals’ perceptions of safety (themselves linked to safety circumstances at a given time, and  
19  
20  
21 inherently instable and subject to change). If culture does not change so rapidly, perceptions do.[21]  
22

23  
24 Finally, unlike other similar studies published anywhere focused on tool evaluation or developing the  
25  
26 survey tool, the primary objective of our study focused on “to explore the attitudes and perceptions of  
27  
28 patient safety culture for pharmacy workers in China by using a Pharmacy Survey on Patient Safety  
29  
30 Culture ”. Hence, we did not conduct a confirmatory factor analysis to test  
31  
32 hypotheses about a particular factor structure which might be a weakpoint in this study. However, we  
33  
34 will take this into our consideration with larger sample size in our future study  
35  
36  
37  
38  
39  
40

## 41 **Conclision**

42  
43  
44 The results demonstrated that among the pharmacy staff surveyed in China there was a positive  
45  
46  
47 attitudes towards patient safety culture in their organizations. The Chinese translation of PSOPSC  
48  
49  
50 questionnaire (version 2012) used in our study was acceptable.  
51  
52  
53  
54  
55  
56  
57  
58  
59  
60

## Footnotes

## Acknowledgement

Thanks for all the respondents who took part in this study. Thanks Prof.Kang Deying for his statistical support and Miss Kathren Sieminski for her help with English revising.

## Contributors

MMZ conceptualized and designed the study. PLJ and LHZ performed and interpreted the data analysis. MMZ and PLJ drafted and revised the manuscript critically for intellectual content. The rest of authors did data collection and checked data input. All authors read and approved the final manuscript.

## Competing interests

None

## Funding

This project was supported by National Natural Science foundation NO.70973083

## Data sharing statement

No additional data are available.

## Reference

- 1 Bond CA, Raehl CL, Franke T. Clinical pharmacy services, hospital pharmacy staffing, and medication errors in United States hospitals. *Pharmacotherapy* 2002;22:134-47.
- 2 Kaushal R, Shojania KG, Bates DW. Effects of computerized physician order entry and clinical

- 1  
2  
3 decision support systems on medication safety. *Arch Intern Med* 2003;163:1409-16.
- 4  
5  
6 3 Kelly WN. Potential risks and prevention, part 4: Reports of significant adverse drug events. *Am J*  
7  
8 *Health Syst Pharm* 2001;58:1406-12.
- 9  
10  
11 4 Nie YL, Mao XY, Cui H, et al. Hospital survey on patient safety culture in China. *BMC Health Serv*  
12  
13 *Res* 2013;13:228.
- 14  
15  
16 5 Benjamin DM. Reducing Medication Errors and Increasing Patient Safety: Case Studies in Clinical  
17  
18 Pharmacology. *J Clin Pharmacol* 2003;43:768-83
- 19  
20  
21 6 Patel I, Balkrishnan R. Medication error management around the globe: An overview. *Indian J*  
22  
23 *Pharm Sci* 2010;72:539-45.
- 24  
25  
26 7 The national annual report of adverse drug reaction monitoring in 2011.  
27  
28  
29 <http://www.sda.gov.cn/WS01/CL0078/72193.html> (accessed May 2012)
- 30  
31  
32 8 Hartigan-Go K. Developing a pharmacovigilance system in the Philippines, a country of diverse  
33  
34 culture and strong traditional medicine background. *Toxicology* 2002;181-182:103-7.
- 35  
36  
37 9 Westat R, Martha F, Joann S. Pharmacy Survey on Patient Safety Culture: User's Guide.( Prepared  
38  
39 by Rockville, MD 20850 Contract No. HHSA290200710024C). AHRQ Publication No.  
40  
41 12(13)-0085: Agency for Healthcare Research and Quality, 2012.  
42  
43 <http://www.ahrq.gov/professionals/quality-patient-safety/patientsafetyculture/pharmacy/index.html>
- 44  
45  
46  
47  
48 10 Norden-Hägg A, Sexton J, Källemark-Sporrong S, et al. Assessing safety culture in pharmacies:  
49  
50 The psychometric validation of the Safety Attitudes Questionnaire (SAQ) in a national sample of  
51  
52  
53  
54  
55  
56  
57  
58  
59  
60

- 1  
2  
3 community pharmacies in Sweden. *BMC Pharmacol Toxicol* 2010;10:8.  
4  
5 11 Ito S, Seto K, Kigawa M, et al. Development and applicability of Hospital Survey on Patient  
6  
7 Safety Culture (HSOPS) in Japan. *BMC Health Serv Res* 2011;11:28.  
8  
9  
10 12 Sorra JS, Dyer N. Multilevel psychometric properties of the AHRQ hospital survey on patient  
11  
12 safety culture. *BMC Health Serv Res* 2010;10:199.  
13  
14  
15 13 Singer SJ, Gaba DM, Geppert JJ, et al. The culture of safety: results of an organization-wide  
16  
17 survey in 15 California hospitals. *Qual Saf Health Care* 2003;2:112-8.  
18  
19  
20 14 Hellings J, Schrooten W, Klazinga N, et al. Challenging patient safety culture: survey results. *Int J*  
21  
22 *Health Care Qual Assur* 2007;20:620-32.  
23  
24  
25 15 Nieva VF, Sorra J. Safety culture assessment: A tool for improving patient safety in healthcare  
26  
27 organizations. *Qual Saf Health Care* 2003;12:ii17-ii23.  
28  
29  
30 16 Kanse L, Schaaf TW Van Der, Vrijland ND, et al. Error recovery in a hospital pharmacy.  
31  
32 *Ergonomics* 2006;49:503-16.  
33  
34  
35 17 Phipps DL, De Bie J, Herborg H, et al. Evaluation of the Pharmacy Safety Climate Questionnaire  
36  
37 in European community pharmacies. *Int J Qual Health Care* 2012;24:16-22.  
38  
39  
40 18 Ashcroft DM, Morecroft C, Parker D, et al. Safety culture assessment in community pharmacy:  
41  
42 development, face validity, and feasibility of the Manchester Patient Safety Assessment Framework  
43  
44 *Qual Saf Health Care* 2005;14:417-21.  
45  
46  
47 19 Ashcroft DM, Parker D. Development of the Pharmacy Safety Climate Questionnaire: a principal  
48  
49  
50  
51  
52  
53  
54  
55  
56  
57  
58  
59  
60

- 1  
2  
3 components analysis. *Quality and Safety in Health Care* 2009;18:28-31.  
4  
5  
6 20 Westat, Rockville. 2012 Preliminary Comparative Results:Pharmacy Survey on Patient Safety  
7  
8 Culture.(Prepared by Westat, Rockville Contract No. HHS 290200710037). AHRQ Publication  
9  
10 No. 12-0085-1-EF: U.S. Department of Health and Human Services, 2012.  
11  
12 <http://www.ahrq.gov/professionals/quality-patient-safety/patientsafetyculture/pharmacy/index.html>  
13  
14  
15  
16 21 Occelli P, Quenon JL, Kret M et al. Validation of the French version of the Hospital Survey  
17  
18 on Patient Safety Culture questionnaire. *Int J Qual Health Care* 2013;25:459–68.  
19  
20  
21 22 Norden-Hagg A, Kalvemark-Sporrong S, Lindblad AK. Exploring the relationship between safety  
22  
23 culture and reported dispensing errors in a large sample of Swedish community pharmacies. *BMC*  
24  
25 *Pharmacol Toxicol* 2012;13:4.  
26  
27  
28  
29 23 Chen IC, Li H-H. Measuring patient safety culture in Taiwan using the Hospital Survey on Patient  
30  
31 Safety Culture (HSOPSC). *BMC Health Serv Res* 2010;10:152.  
32  
33  
34  
35 24 Colla JB, Bracken AC, Kinney LM, et al. Measuring patient safety climate: a review of surveys.  
36  
37 *Qual Saf Health Care* 2005;14:364-6.  
38  
39  
40 25 Ning-Jiang Bao, Hong Shao, Xiao-Yan Nie, et al. Analysis of the status of clinical pharmacist pilot  
41  
42 training in Chinese hospitals. *Chinese Pharmaceutical Sciences* 2011;20:410-14.  
43  
44  
45 26 Bodur S, Filiz E. A survey on patient safety culture in primary healthcare services in Turkey. *Int J*  
46  
47 *Qual Health Care* 2009;21:348-55.  
48  
49  
50 27 Joann S, Theresa F, Naomid D, et al. 2012 User Comparative Database Report: Hospital Survey on  
51  
52  
53  
54  
55  
56  
57  
58  
59  
60

1  
2 Patient Safety Culture.( Prepared by Westat, Rockville, MD under Contract No. HHSA  
3  
4  
5 290200710024C). Agency for Healthcare Research and Quality,January 2012  
6  
7

8 <http://www.ahrq.gov/professionals/quality-patient-safety/patientsafetyculture/hospital/2012/index.html>  
9

10 28 Zhu J, Li L, Li Y, et al. What constitutes patient safety culture in Chinese hospitals. *Int J Qual*  
11  
12 *Health Care* 2012;24:250-57.  
13

14  
15 29 Nguyen EE, Connolly PM, Wong V. Medication safety initiative in reducing medication errors. *J*  
16  
17 *Nurs Care Qual* 2010;25:224-30.  
18  
19

20  
21 30 Zou B,Zhao S. The application analysis of communication skill in reconstructing the harmonious  
22  
23 doctor-patient relationship. *The Journal of Medical Theory and Practice* 2013;26:1676-78.  
24  
25

26  
27 31 Moore p, Vargas A, Núñez S, et al. A study of hospital complaints and the role of the  
28  
29 doctor-patient communication. *Rev Med Chil* 2011;139:880-5.  
30  
31

32 32 Liu C, Liu W, Wang Y, et al. Patient safety culture in China: a case study in an outpatient setting  
33  
34 in Beijing. *BMJ Qual Saf* 2013;0:1–9.  
35  
36

37 33 Sorlie V, Lindseth A, Uden G, et al. Women physicians' narratives about being in ethically difficult  
38  
39 care situations in paediatrics. *Nurs Ethics* 2000;7:47-62.  
40  
41

42 34 Cao RG. Medical quality and patient safety in China. *Chinese Hospitals* 2007;11:1-4.  
43  
44

45 35 Li XL, Yan SY, Wang YQ, et al. Analysis of 1165 medication errors among 22 hoapitals in Beijing.  
46  
47 *Adverse Drug Reactions Journal* 2013;2:64-68.  
48  
49

50 36 Li XY, Lai BL, Li SL,et al. Error analysis of hospital outpatient pharmacy from 2010 to 2011.  
51  
52  
53  
54  
55  
56  
57  
58  
59  
60

1  
2  
3 *Pharmacy Today* 2012;8:496-97.  
4

5 37 Sexton JB, Paine LA, Manfuso J, et al. A culture check-up for safety in “my patient care area”  
6

7 *Jt Comm J Qual Patient Saf* 2007;33:699-703.  
8  
9

10 38 Hughes RG, Clancy CM. Working conditions that support patient safety. *J Nurs Care Qual*  
11  
12 2005;20:289-92.  
13  
14  
15  
16  
17  
18  
19  
20  
21  
22  
23  
24  
25  
26  
27  
28  
29  
30  
31  
32  
33  
34  
35  
36  
37  
38  
39  
40  
41  
42  
43  
44  
45  
46  
47  
48  
49  
50  
51  
52  
53  
54  
55  
56  
57  
58  
59  
60



## Supplemental file

Table 1 the modified Chinese English version

---

**The questionnaire of the modified Chinese English version**


---

**Dimension/items****1 Physical Space and Environment**

- A1. This pharmacy is well organized.  
 A5. This pharmacy is free of clutter  
 A7. The physical layout of this pharmacy supports good workflow.

**2. Teamwork**

- A2. Staff treat each other with respect.  
 A4. Staff in this pharmacy clearly understand their roles and responsibilities.  
 A9. Staff work together as an effective team.

**3. Staff Training and Skills**

- A3. Technicians in this pharmacy receive the training they need to do their jobs  
 A6. Staff in this pharmacy have the skills they need to do their jobs well.  
 A8. Staff who are new to this pharmacy receive adequate orientation

**4. Communication Openness**

- B1. Staff ideas and suggestions are valued in this pharmacy  
 B5. Staff feel comfortable asking questions when they are unsure about something  
 B10. It is easy for staff to speak up to their supervisor/ manager about patient safety concerns in this

**5. Patient Counseling**

- B2. We encourage patients to talk to pharmacists about their medications.  
 B7. Our pharmacists spend enough time talking to patients about how to use their medications  
 B11. Our pharmacists tell patients important information about their new prescriptions

**6. Staffing, Work Pressure, and Pace**

- B3. Staff take adequate breaks during their shifts  
 B9. We feel rushed when processing prescriptions. (negatively worded)  
 B12. We have enough staff to handle the workload.  
 B16. Interruptions/distractions in this pharmacy (from phone calls, faxes, customers, etc.) make it difficult for staff to work accurately. (negatively worded)

**7. Communication About Prescriptions Across Shifts**

- B4. We have clear expectations about exchanging important prescription information across shifts  
 B6. We have standard procedures for communicating prescription information across shifts.  
 B14. The status of problematic prescriptions is well communicated across shifts

**8. Communication About Mistakes**

- B8. Staff in this pharmacy discuss mistakes.  
 B13. When patient safety issues occur in this pharmacy, staff discuss them.  
 B15. In this pharmacy, we talk about ways to prevent mistakes from happening again.

**9. Response to Mistakes**

- C1. Staff are treated fairly when they make mistakes  
 C4. This pharmacy helps staff learn from their mistakes rather than punishing them  
 C7. We look at staff actions and the way we do things to understand why mistakes happen in this pharmacy.  
 C8. Staff feel like their mistakes are held against them. (negatively worded)

**10. Organizational Learning—Continuous Improvement**

- C2. When a mistake happens, we try to figure out what problems in the work process led to the mistake.  
 C5. When the same mistake keeps happening, we change the way we do things  
 C10. Mistakes have led to positive changes in this pharmacy

**11. Overall Perceptions of Patient Safety**

- C3. This pharmacy places more emphasis on sales than on patient safety. (negatively worded)  
 C6. This pharmacy is good at preventing mistakes.  
 C9. The way we do things in this pharmacy reflects a strong focus on patient safety.

**Documenting Mistakes**

- D1. When a mistake reaches the patient and could cause harm but does not,  
 D2. When a mistake reaches the patient but has no potential to harm the patient,  
 D3. When a mistake that could have harmed the patient is corrected before

**Overall Rating**

- E1. How do you rate this pharmacy on patient safety?

**Background questions**

- F1. How long have you worked in this pharmacy?  
 F2. Typically, how many hours per week do you work in this pharmacy?  
 F3. What is your position in this pharmacy? Check ONE category that best applies to your job.  
 F4. Your gender  
 F5. Your hospital level

**Your Comments**

- G1. Please feel free to write any comments about how things are done or could be done in your pharmacy
-

1  
2  
3  
4  
5  
6  
7  
8  
9  
10  
11  
12  
13  
14  
15  
16  
17  
18  
19  
20  
21  
22  
23  
24  
25  
26  
27  
28  
29  
30  
31  
32  
33  
34  
35  
36  
37  
38  
39  
40  
41  
42  
43  
44  
45  
46  
47  
48  
49  
50  
51  
52  
53  
54  
55  
56  
57

For peer review only
